# Supplementary material for: Rickettsia Phylogenomics: Unwinding the Intricacies of Obligate Intracellular Life
Source: PubMed Central journal article supplement (PMC2635572; doi:10.1371/journal.pone.0002018), 2008-04-16

Figure S2

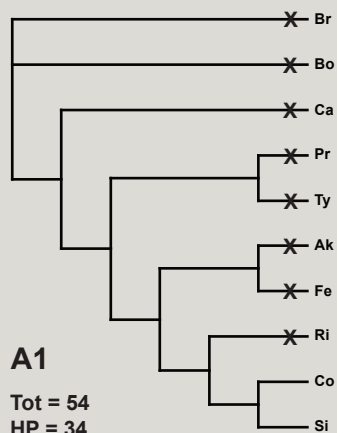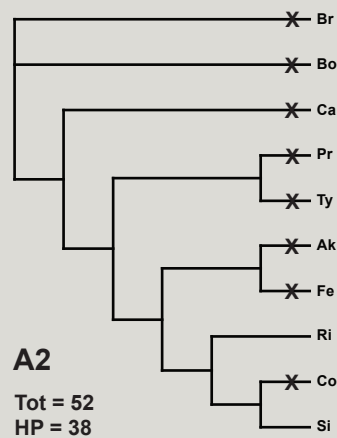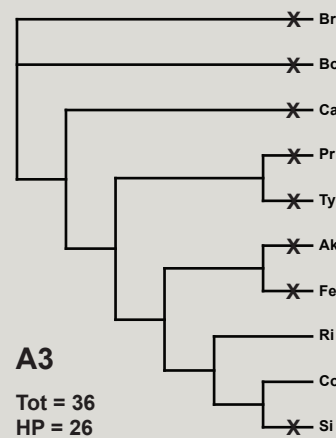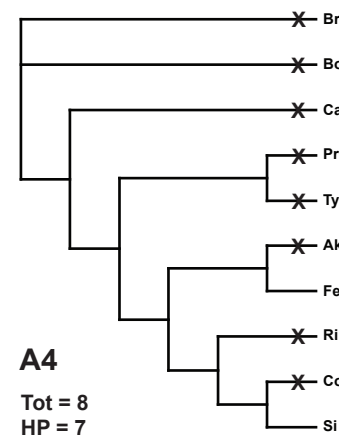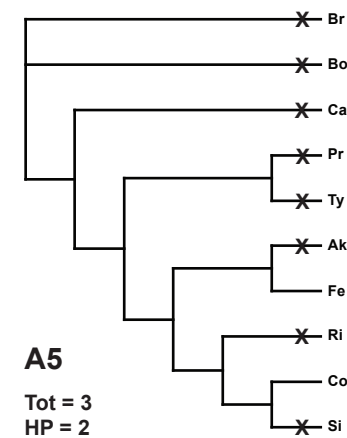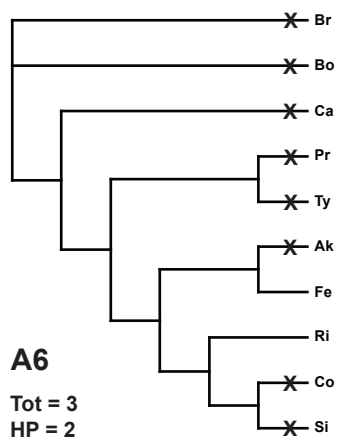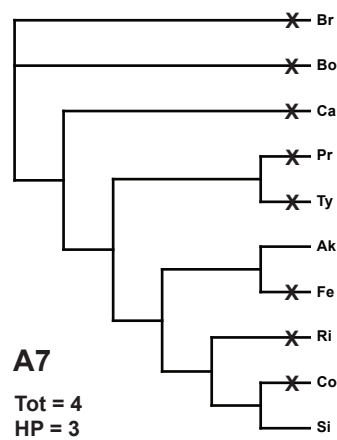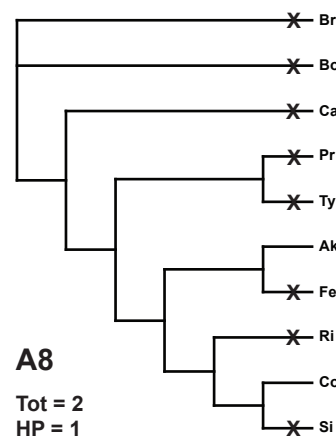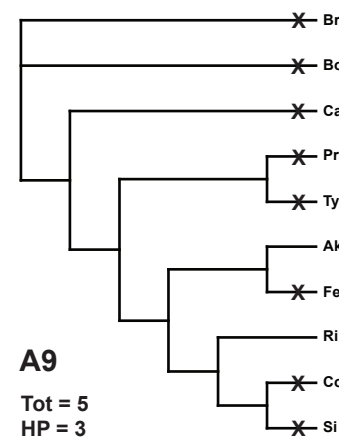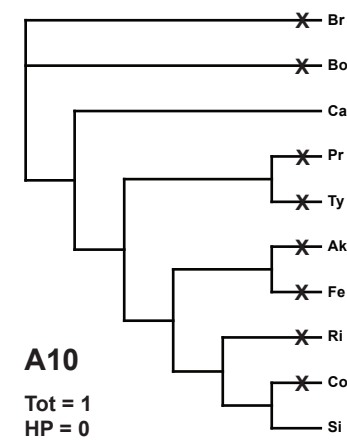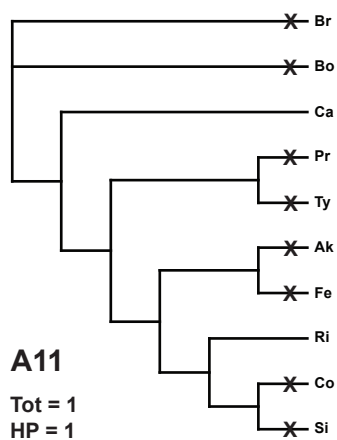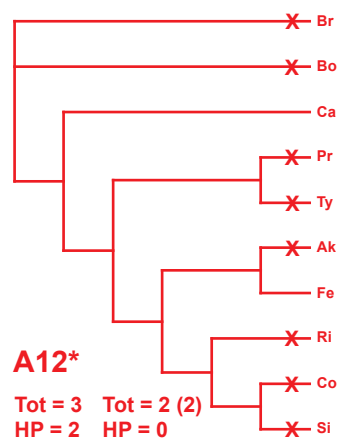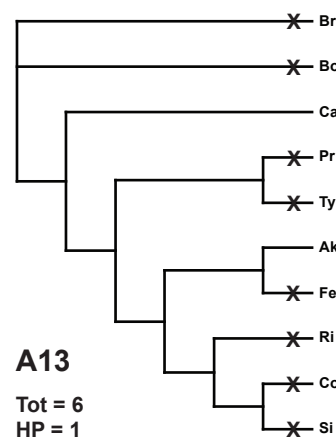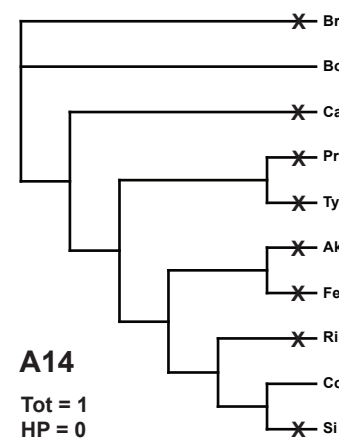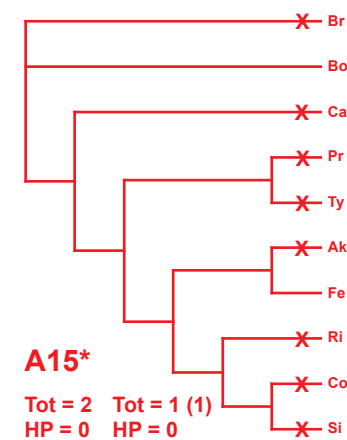

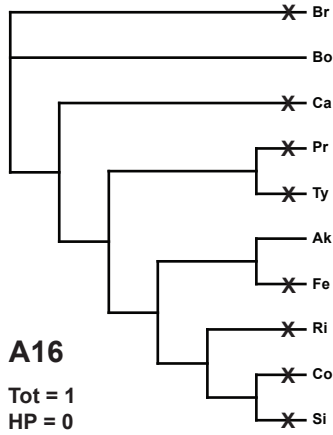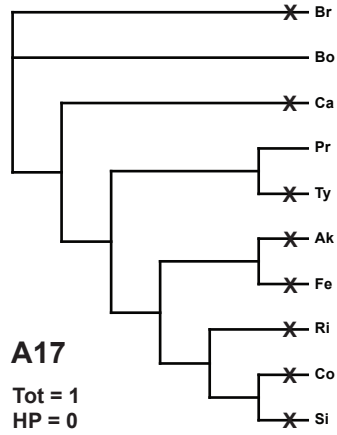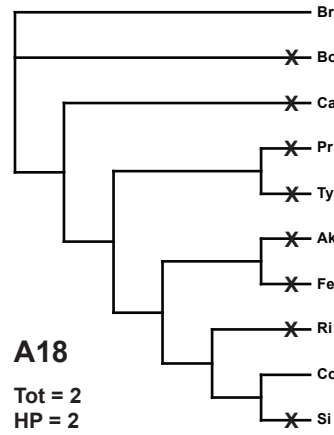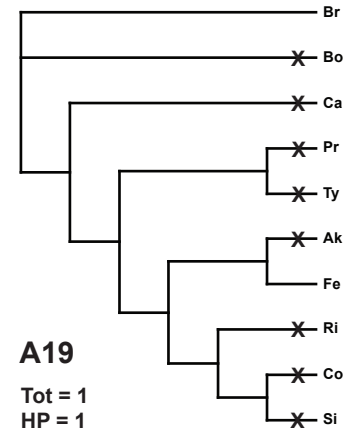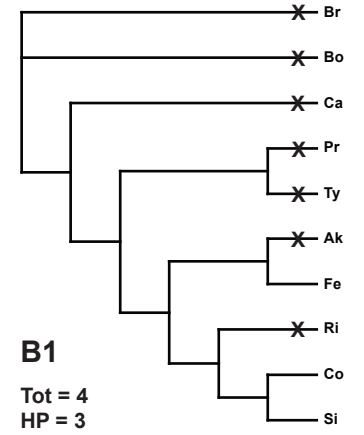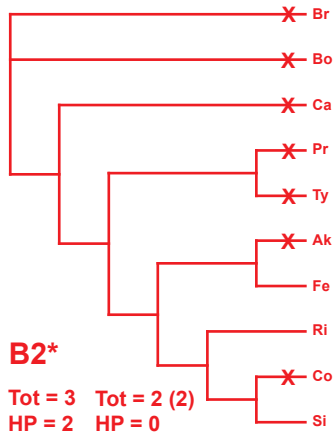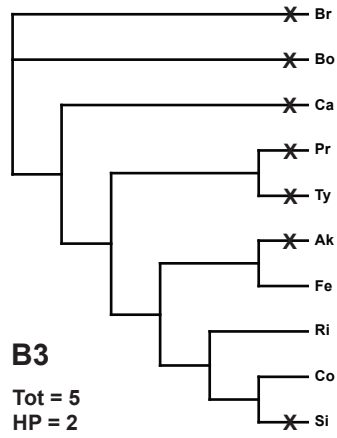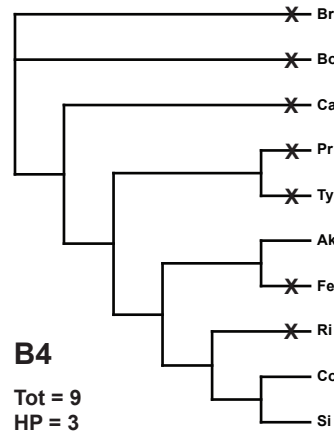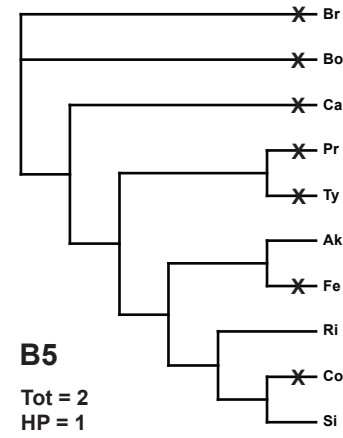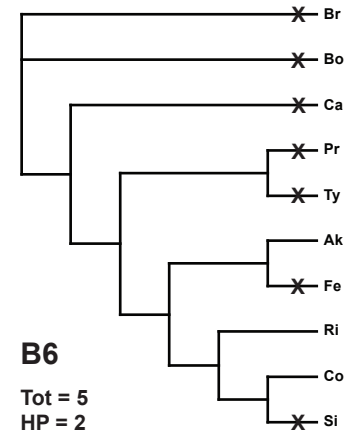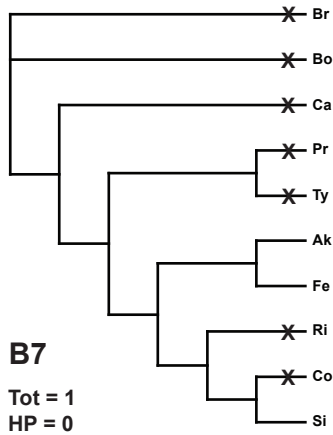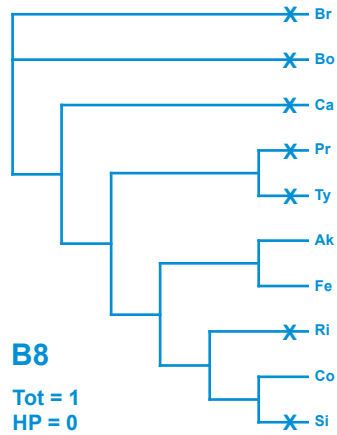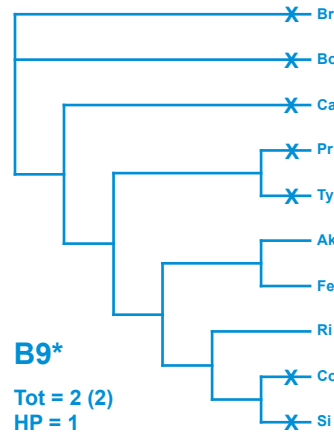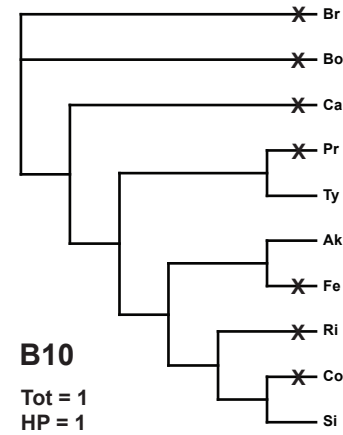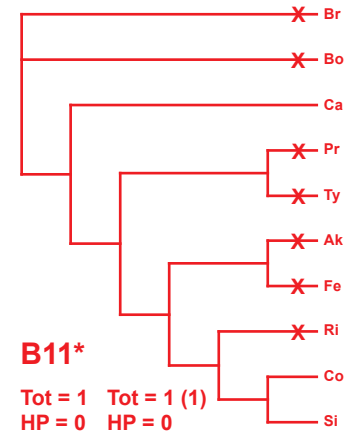

Figure S2

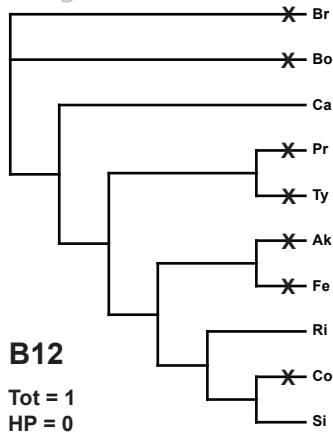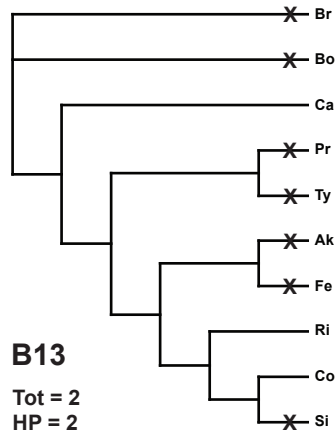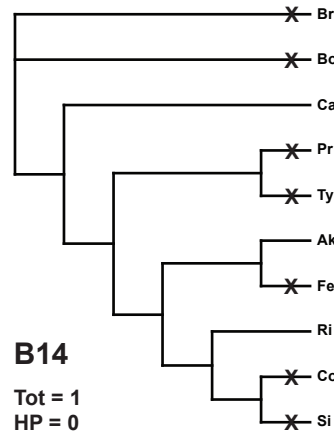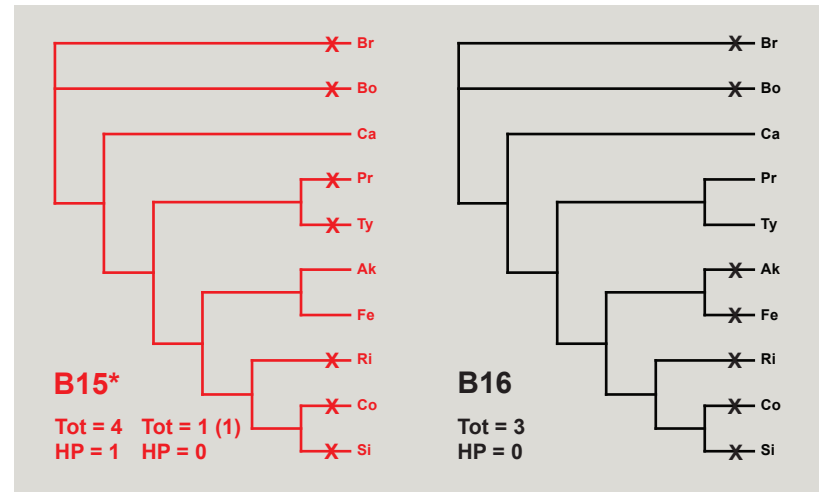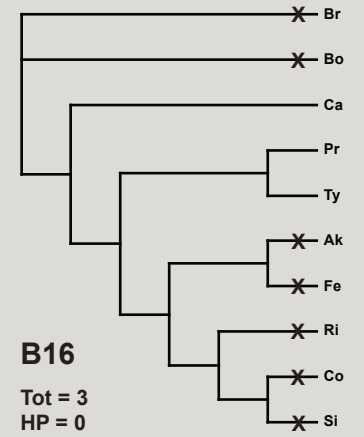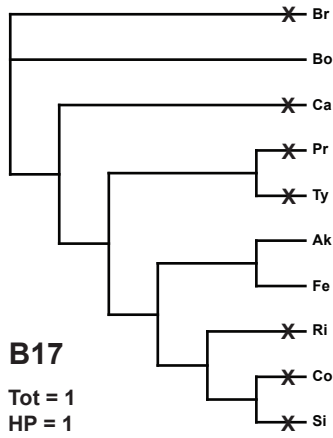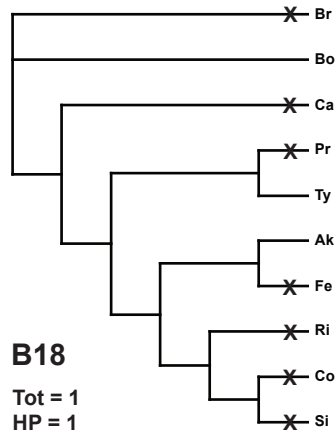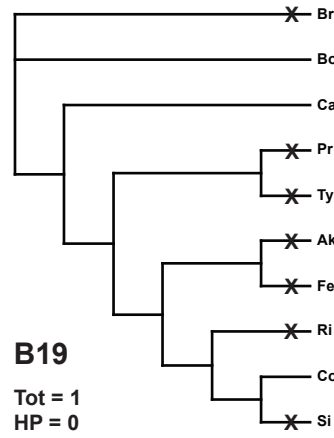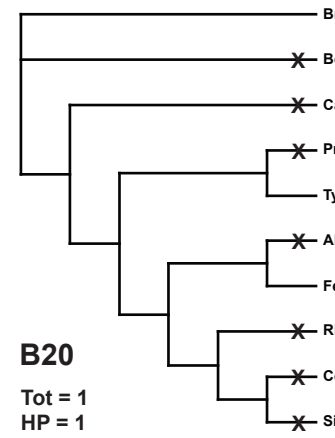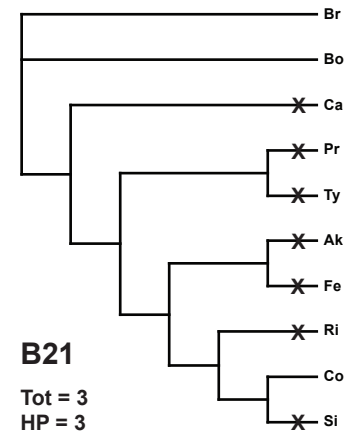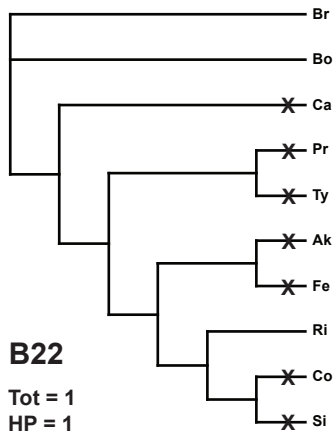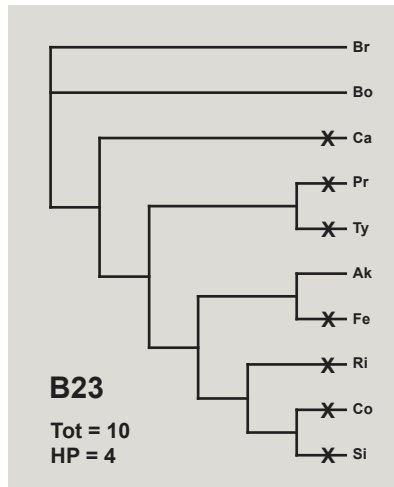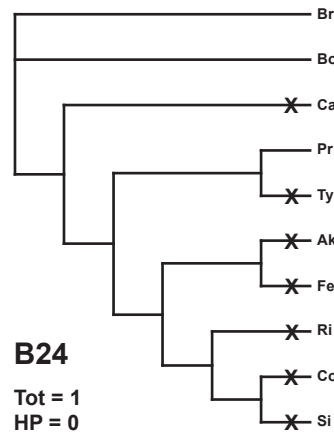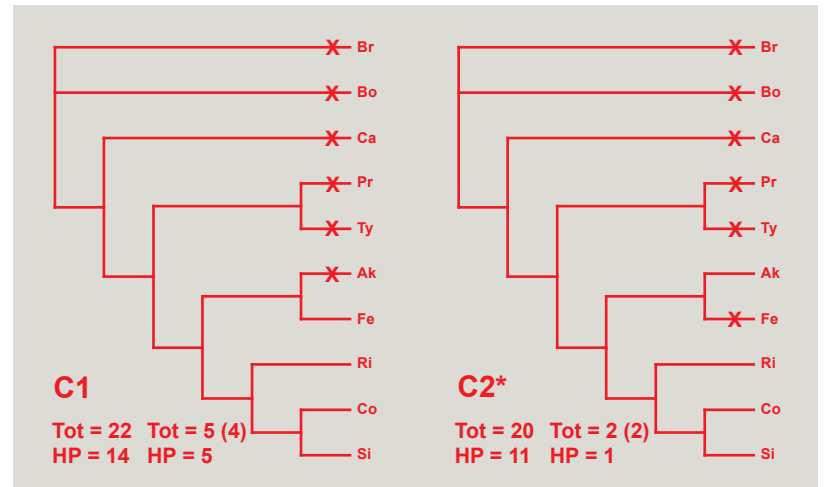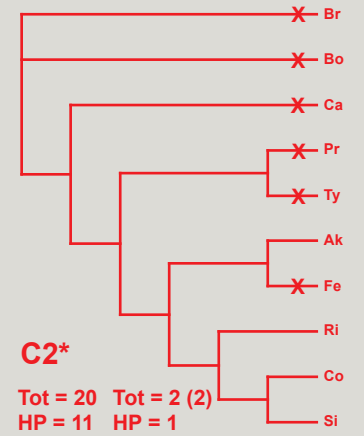

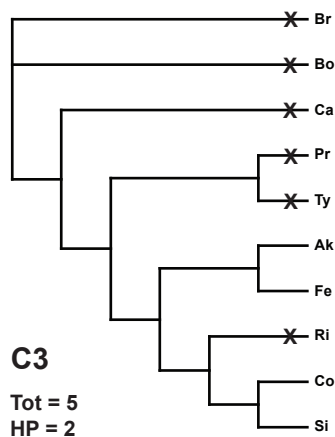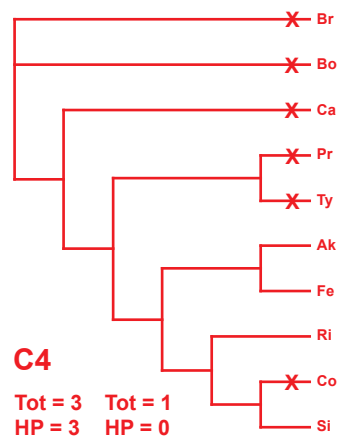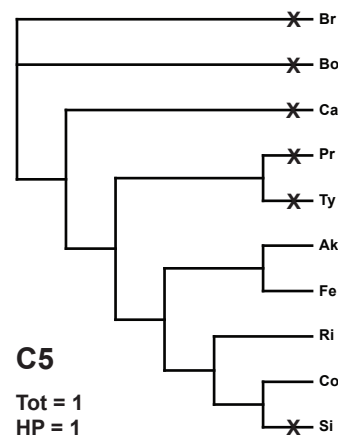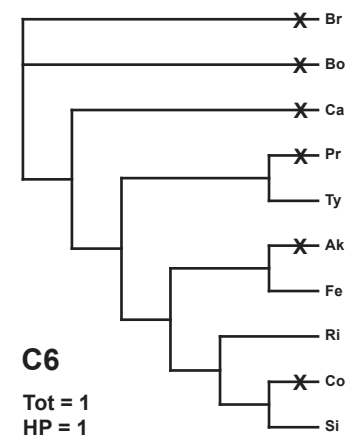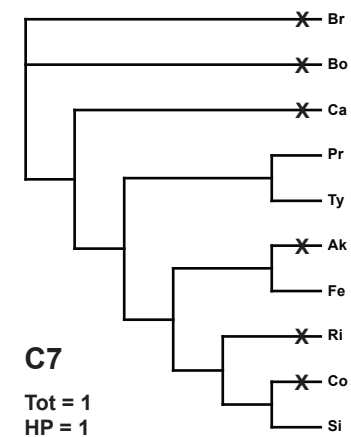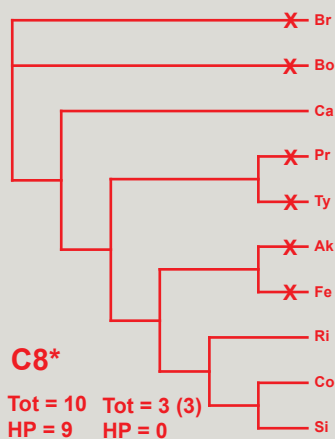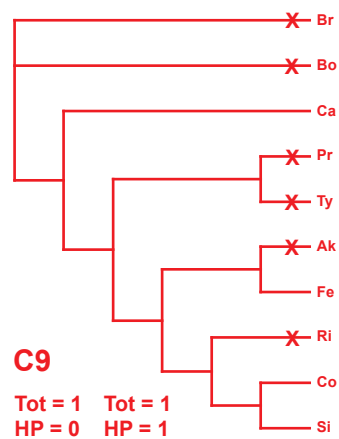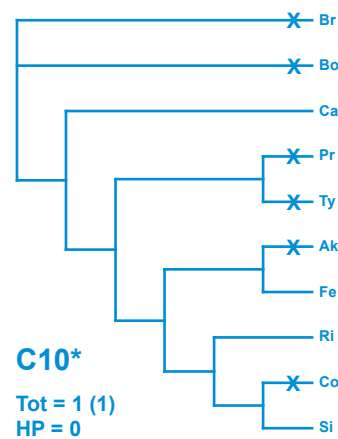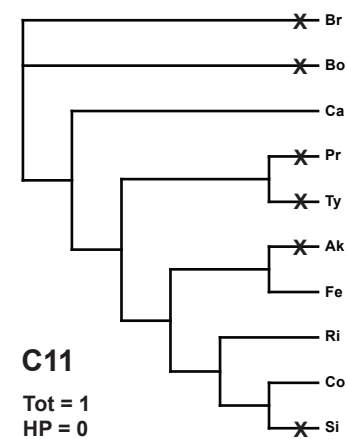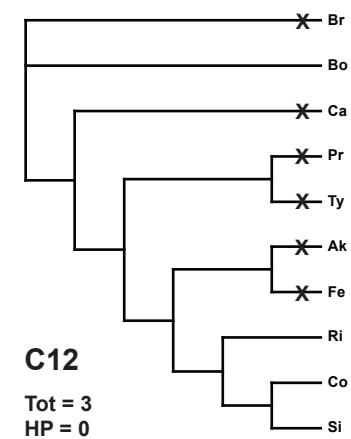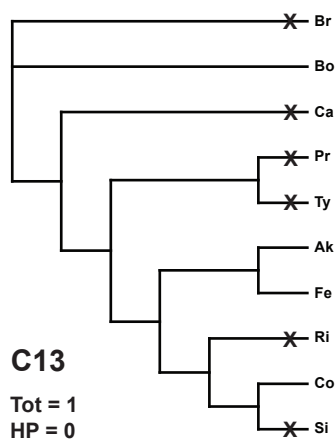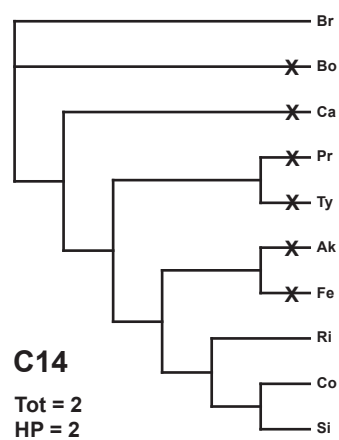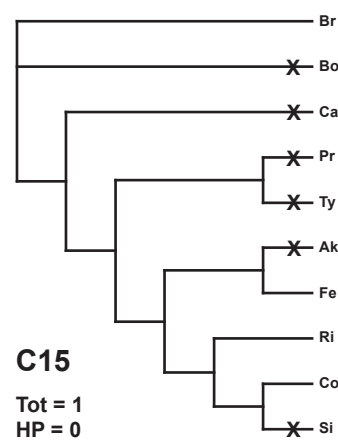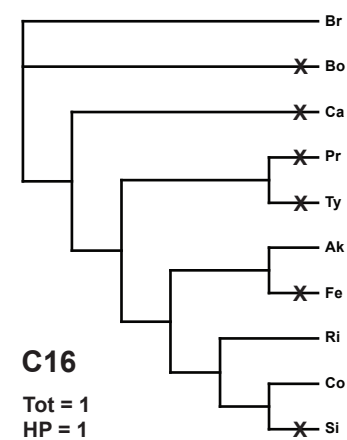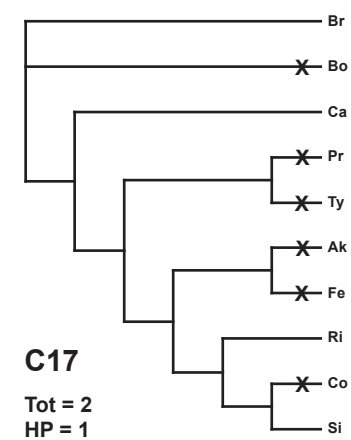

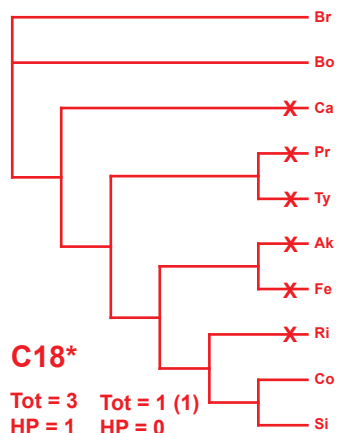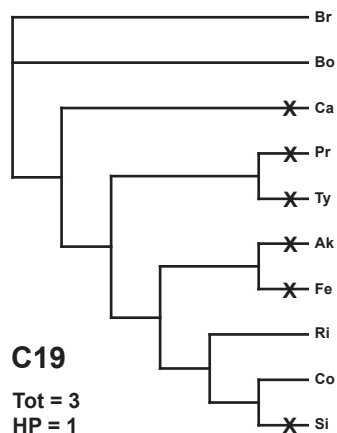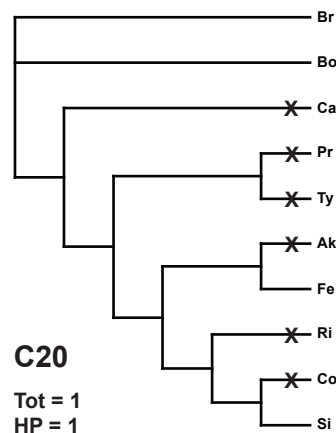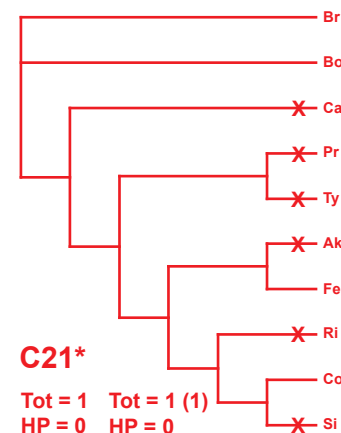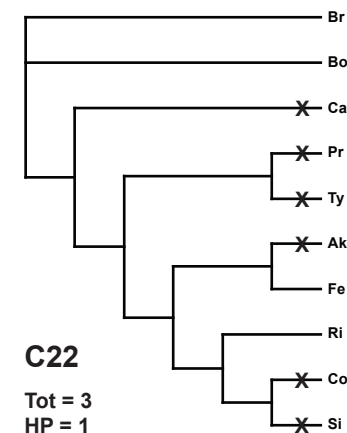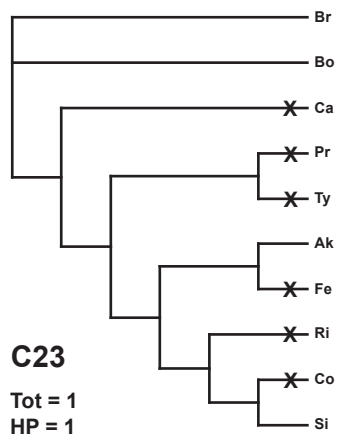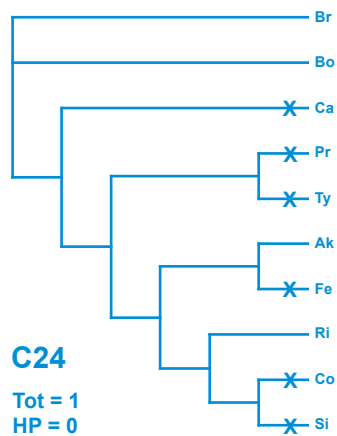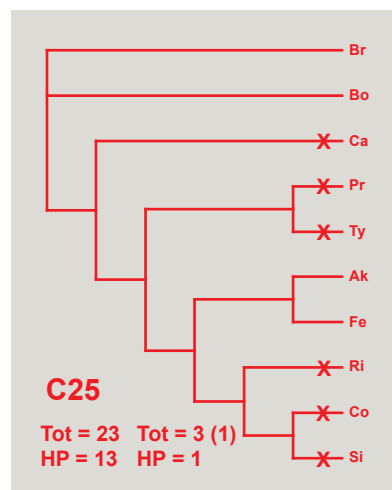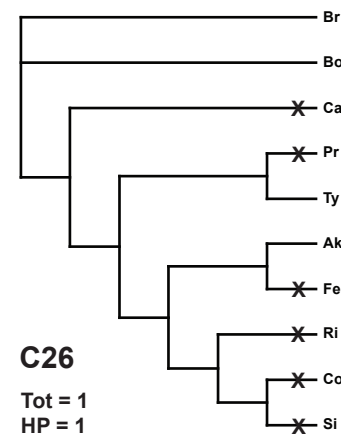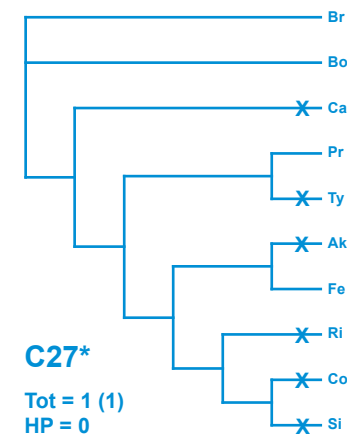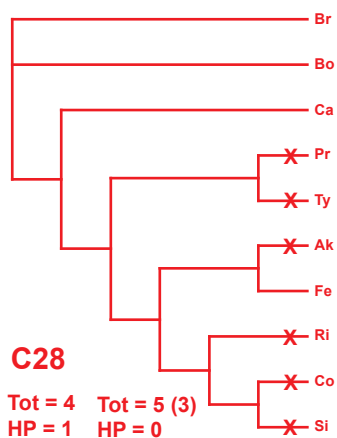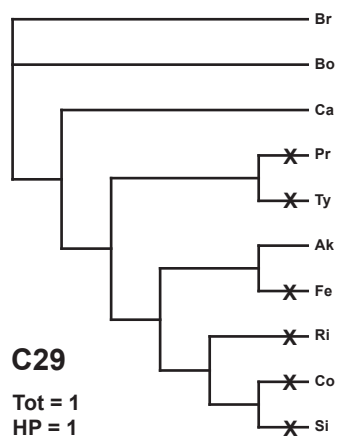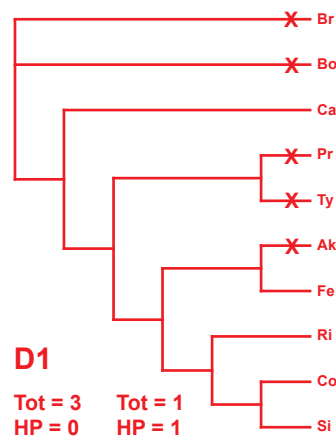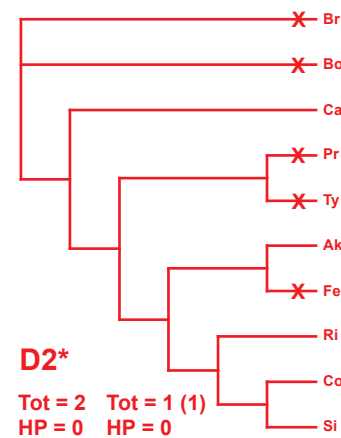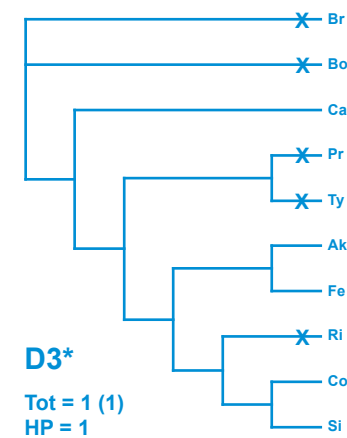

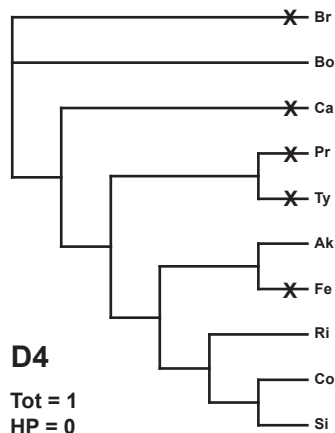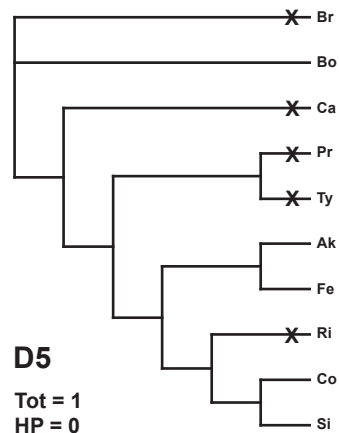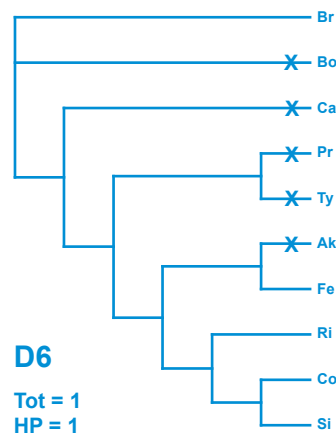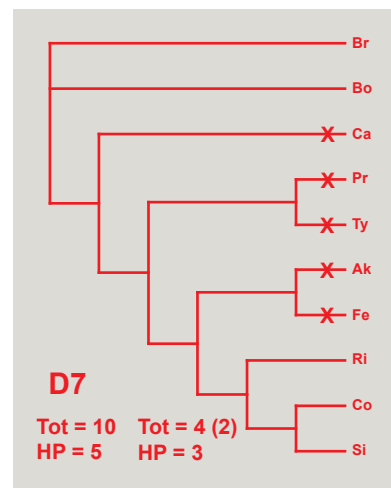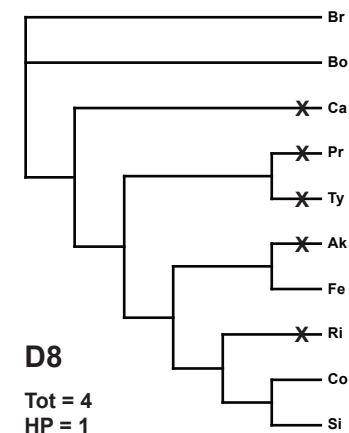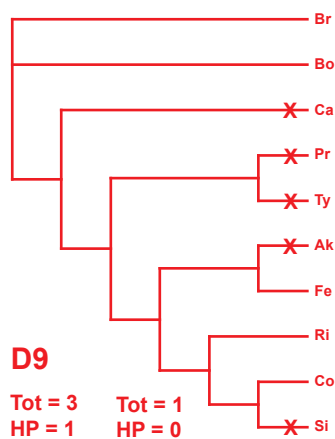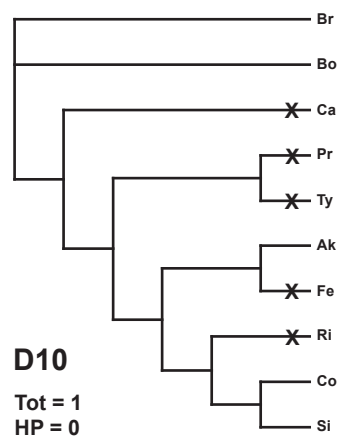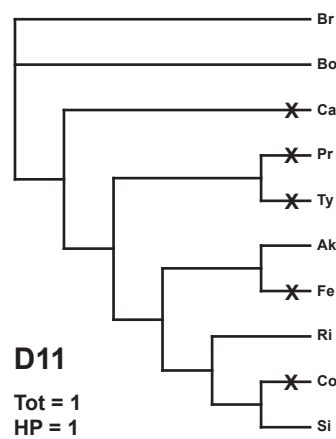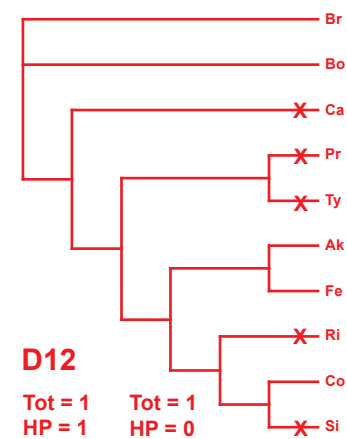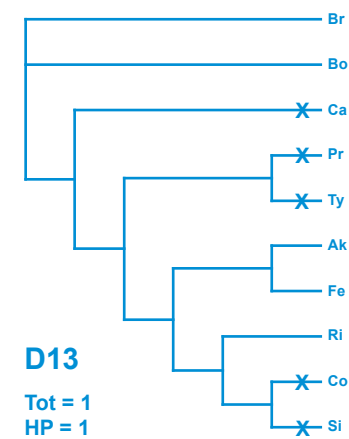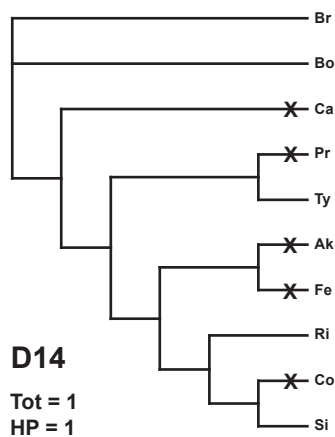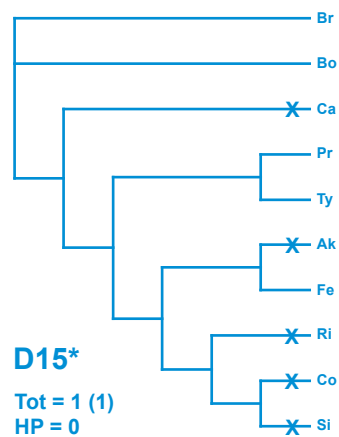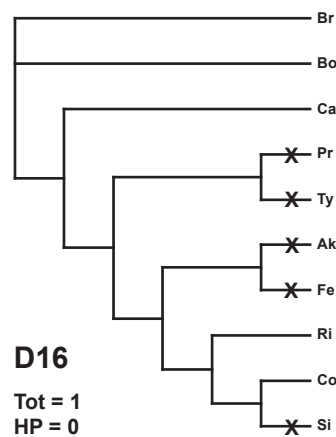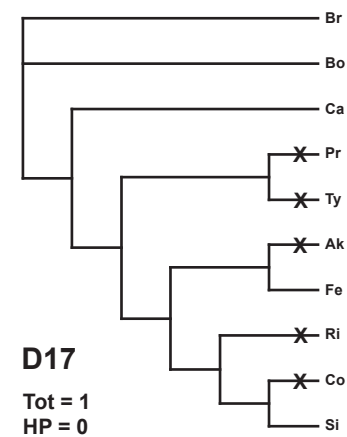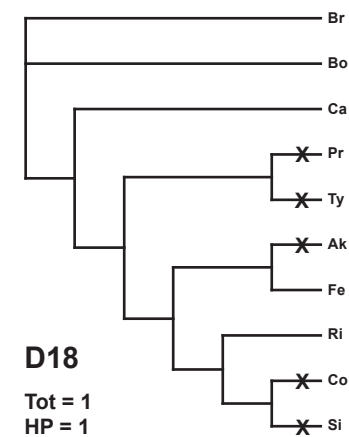

Figure S2

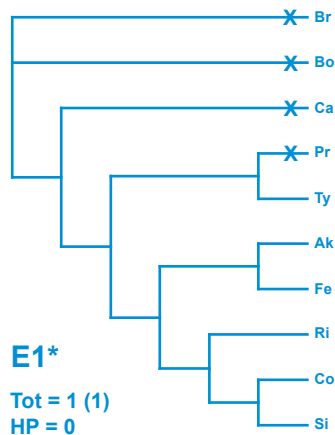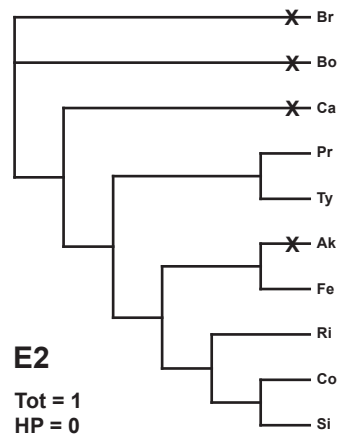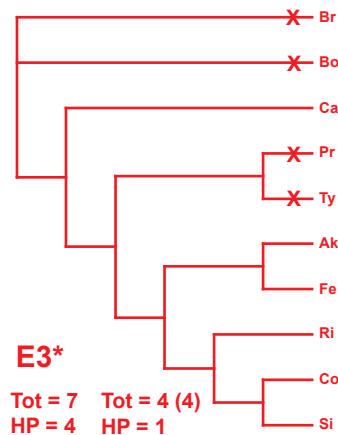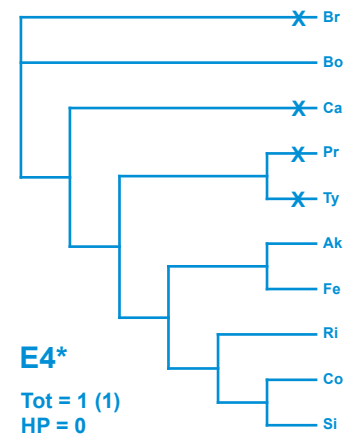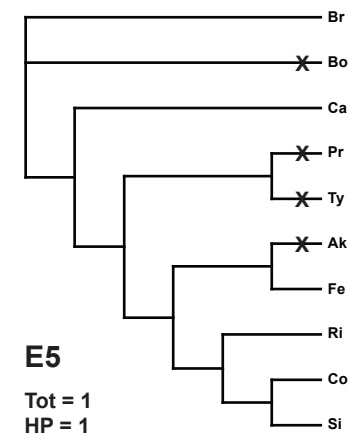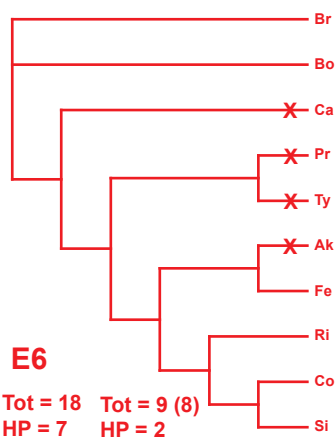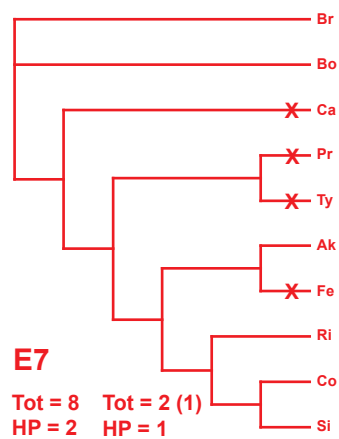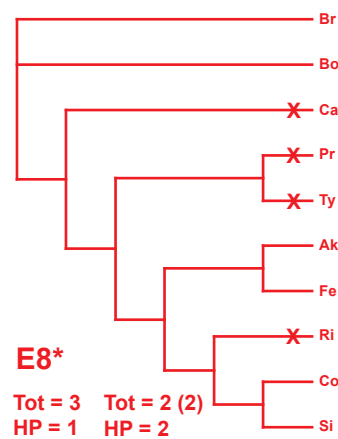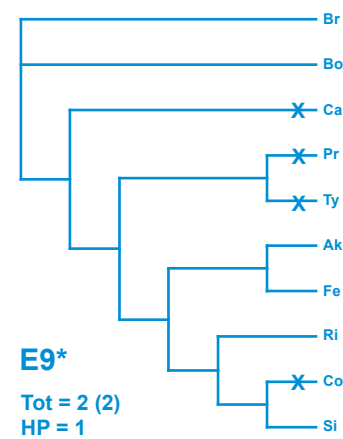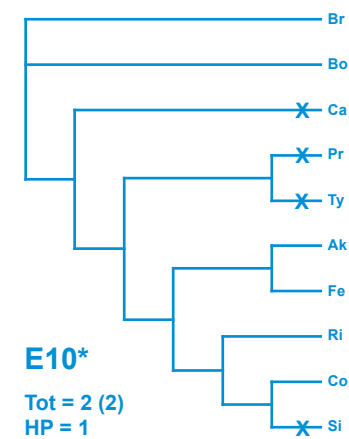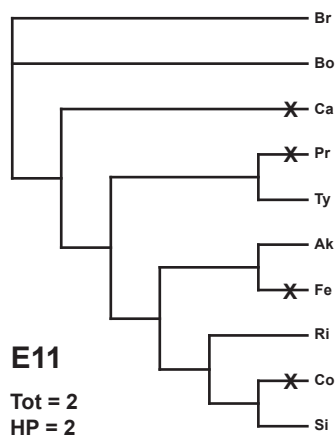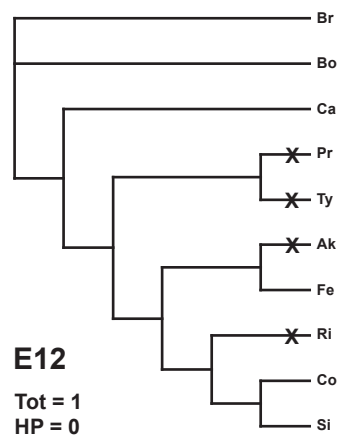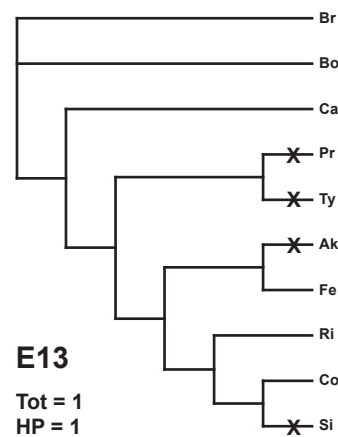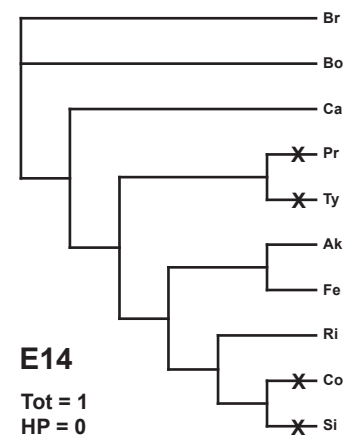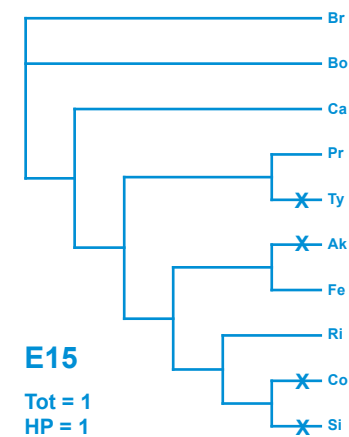

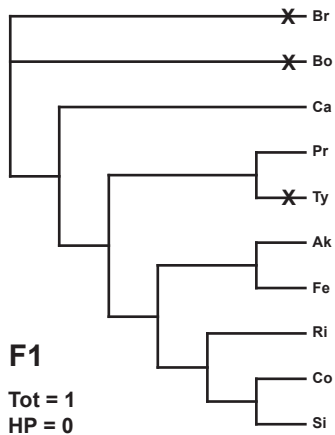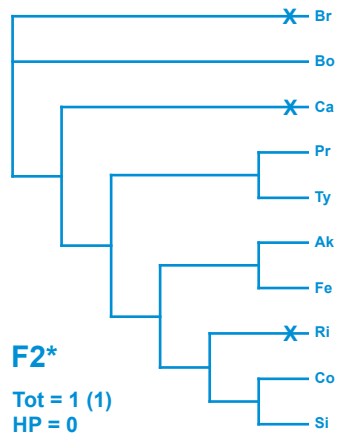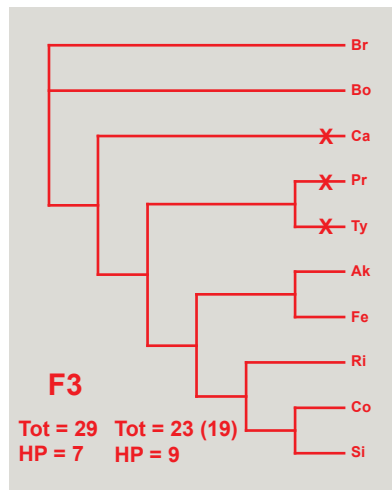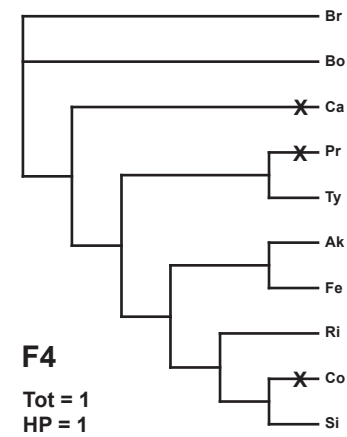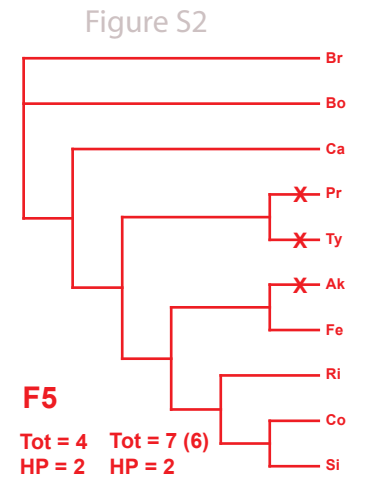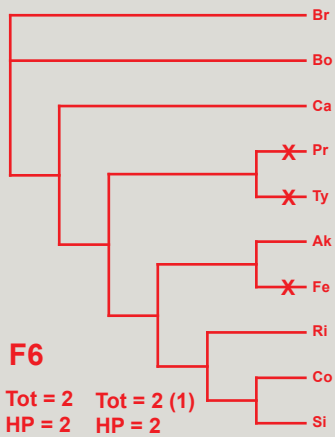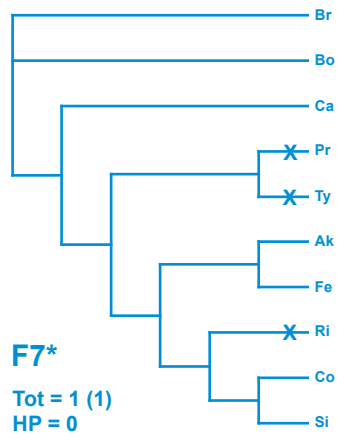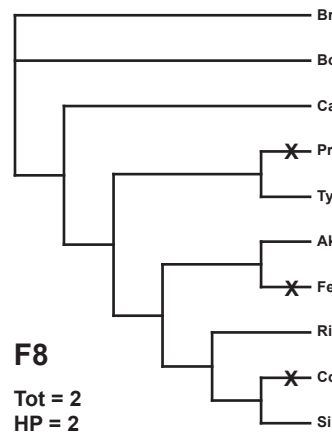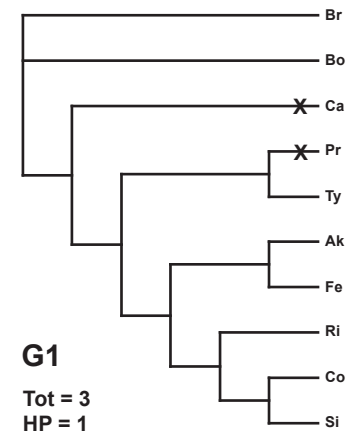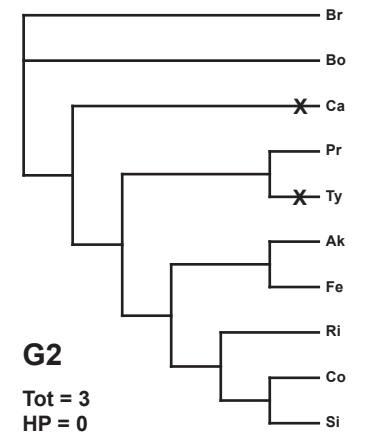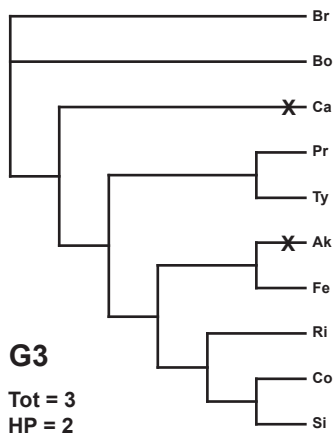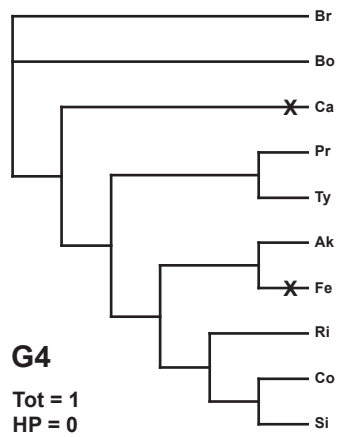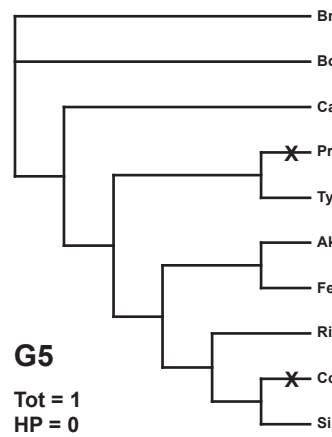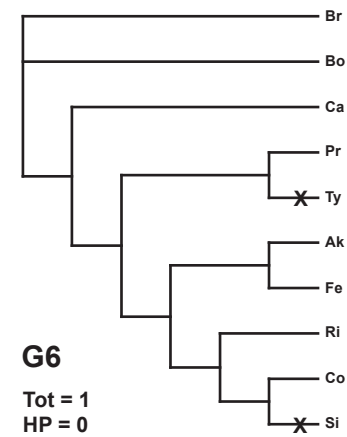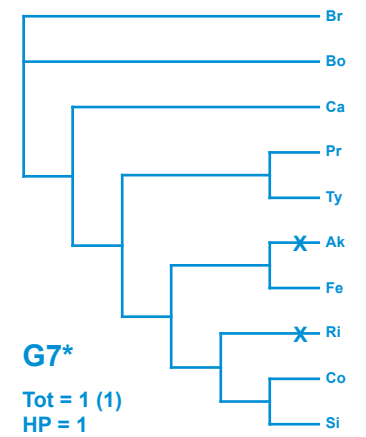

Figure S2



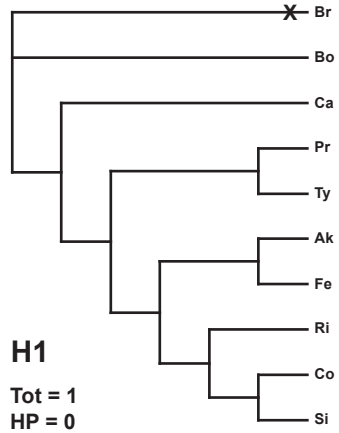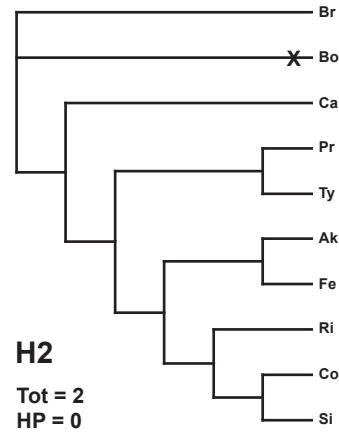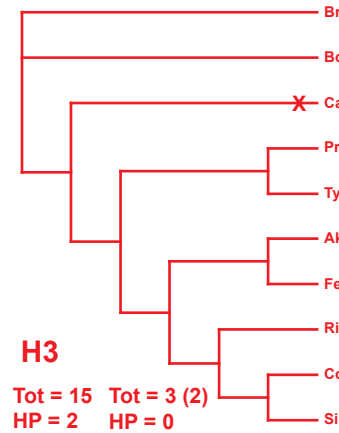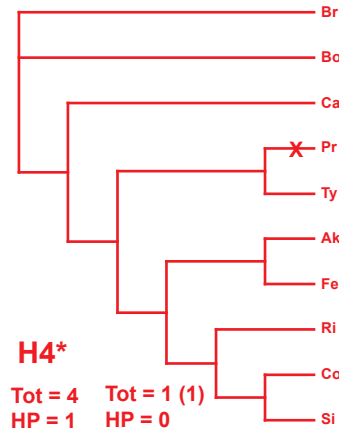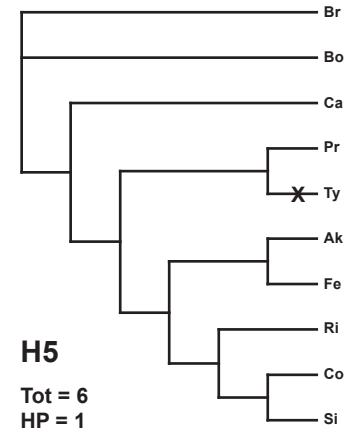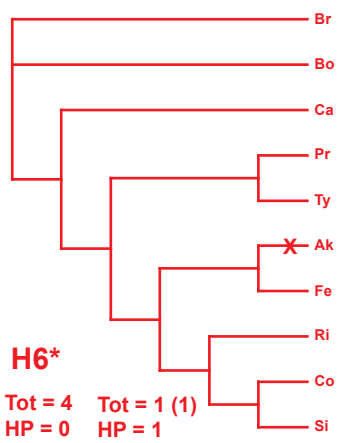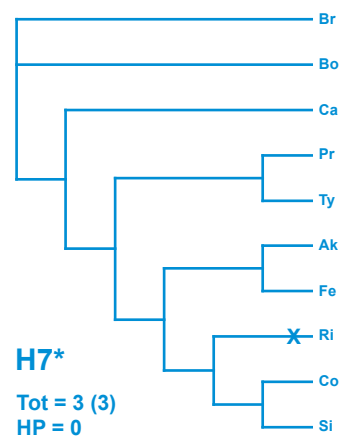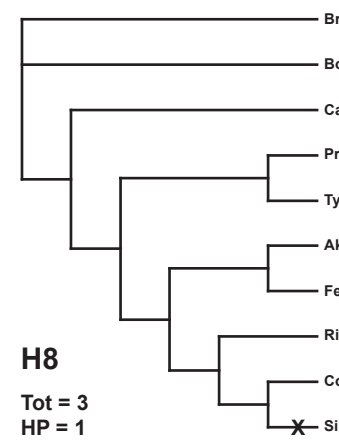

Supplement: pone.0002018.s002.pdf [file pone.0002018.s002.pdf]
