# Supplementary material for: Rickettsia Phylogenomics: Unwinding the Intricacies of Obligate Intracellular Life
Source: PubMed Central journal article supplement (PMC2635572; doi:10.1371/journal.pone.0002018), 2008-04-16
Supplement: pone.0002018.s001.pdf [file pone.0002018.s001.pdf]

**A**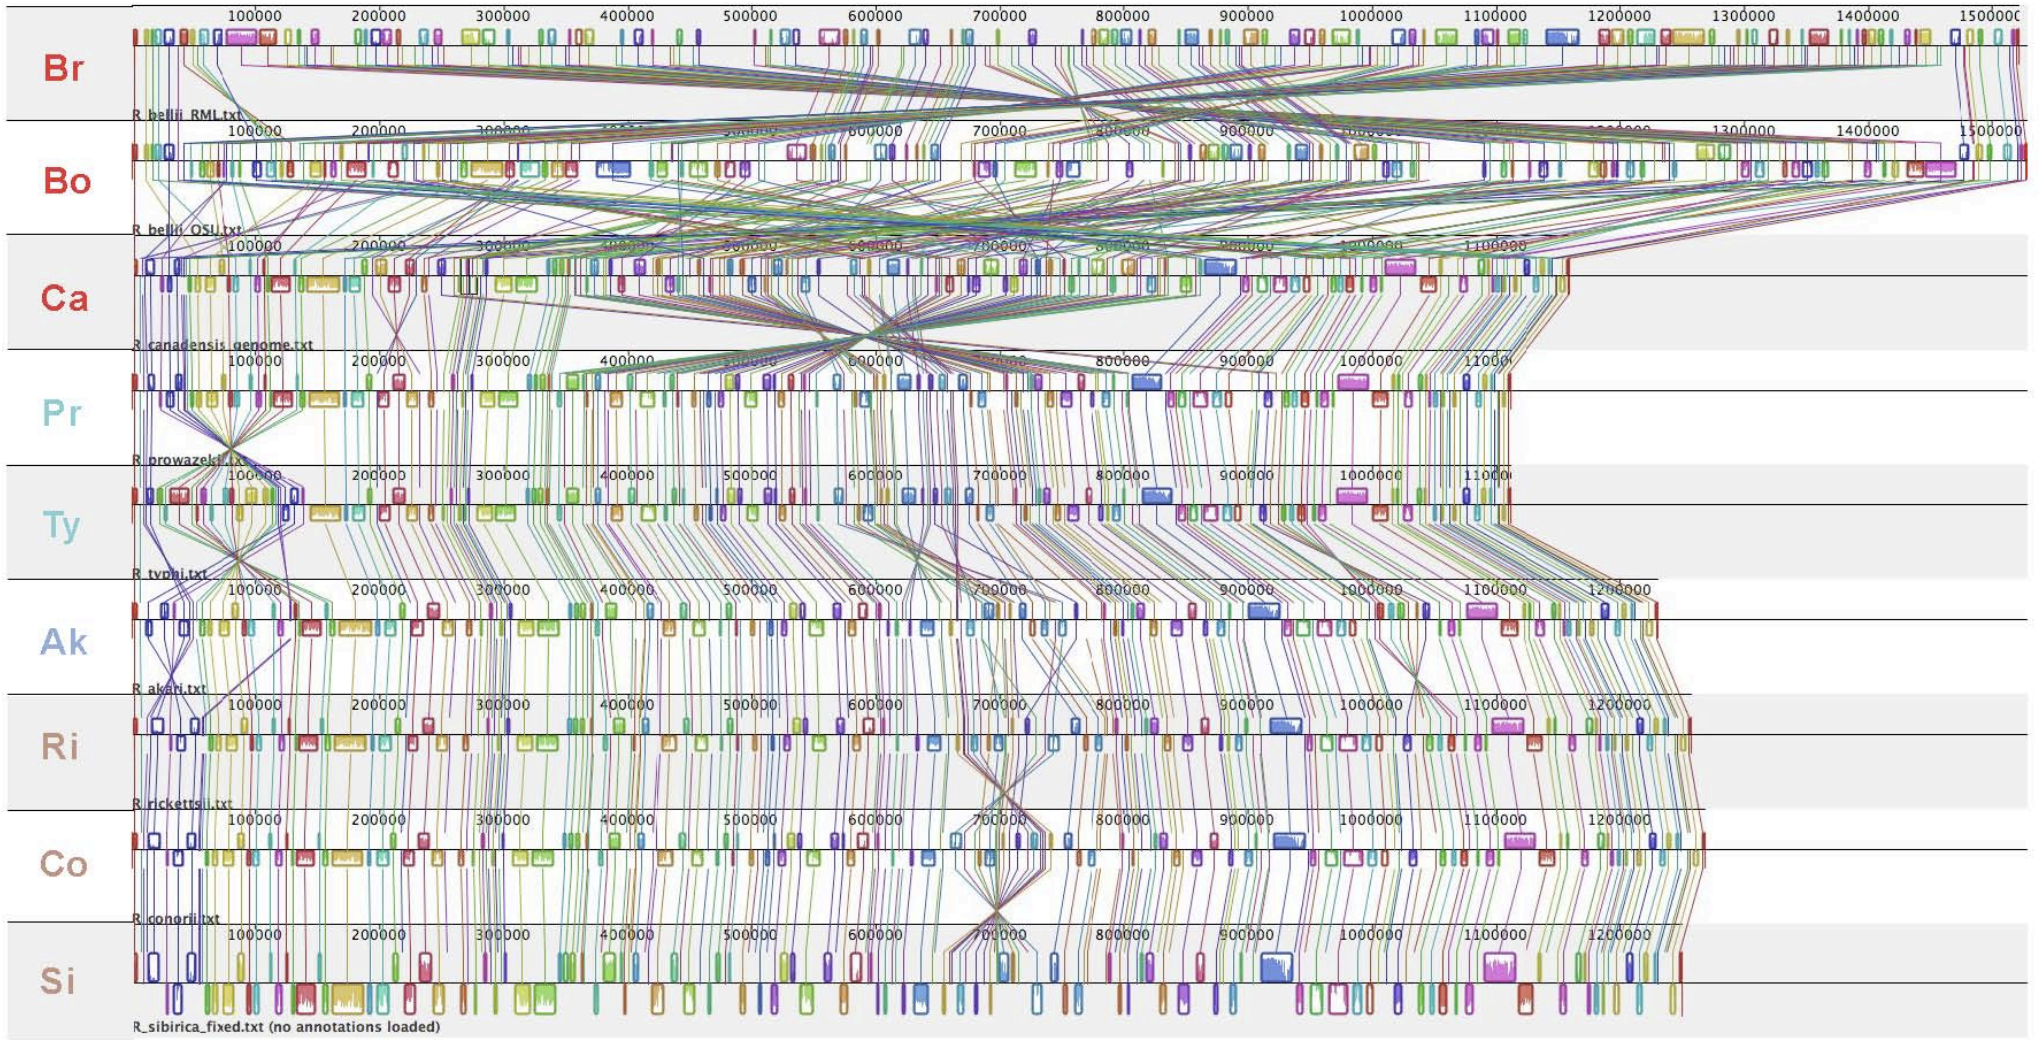

Figure S1-A

**B**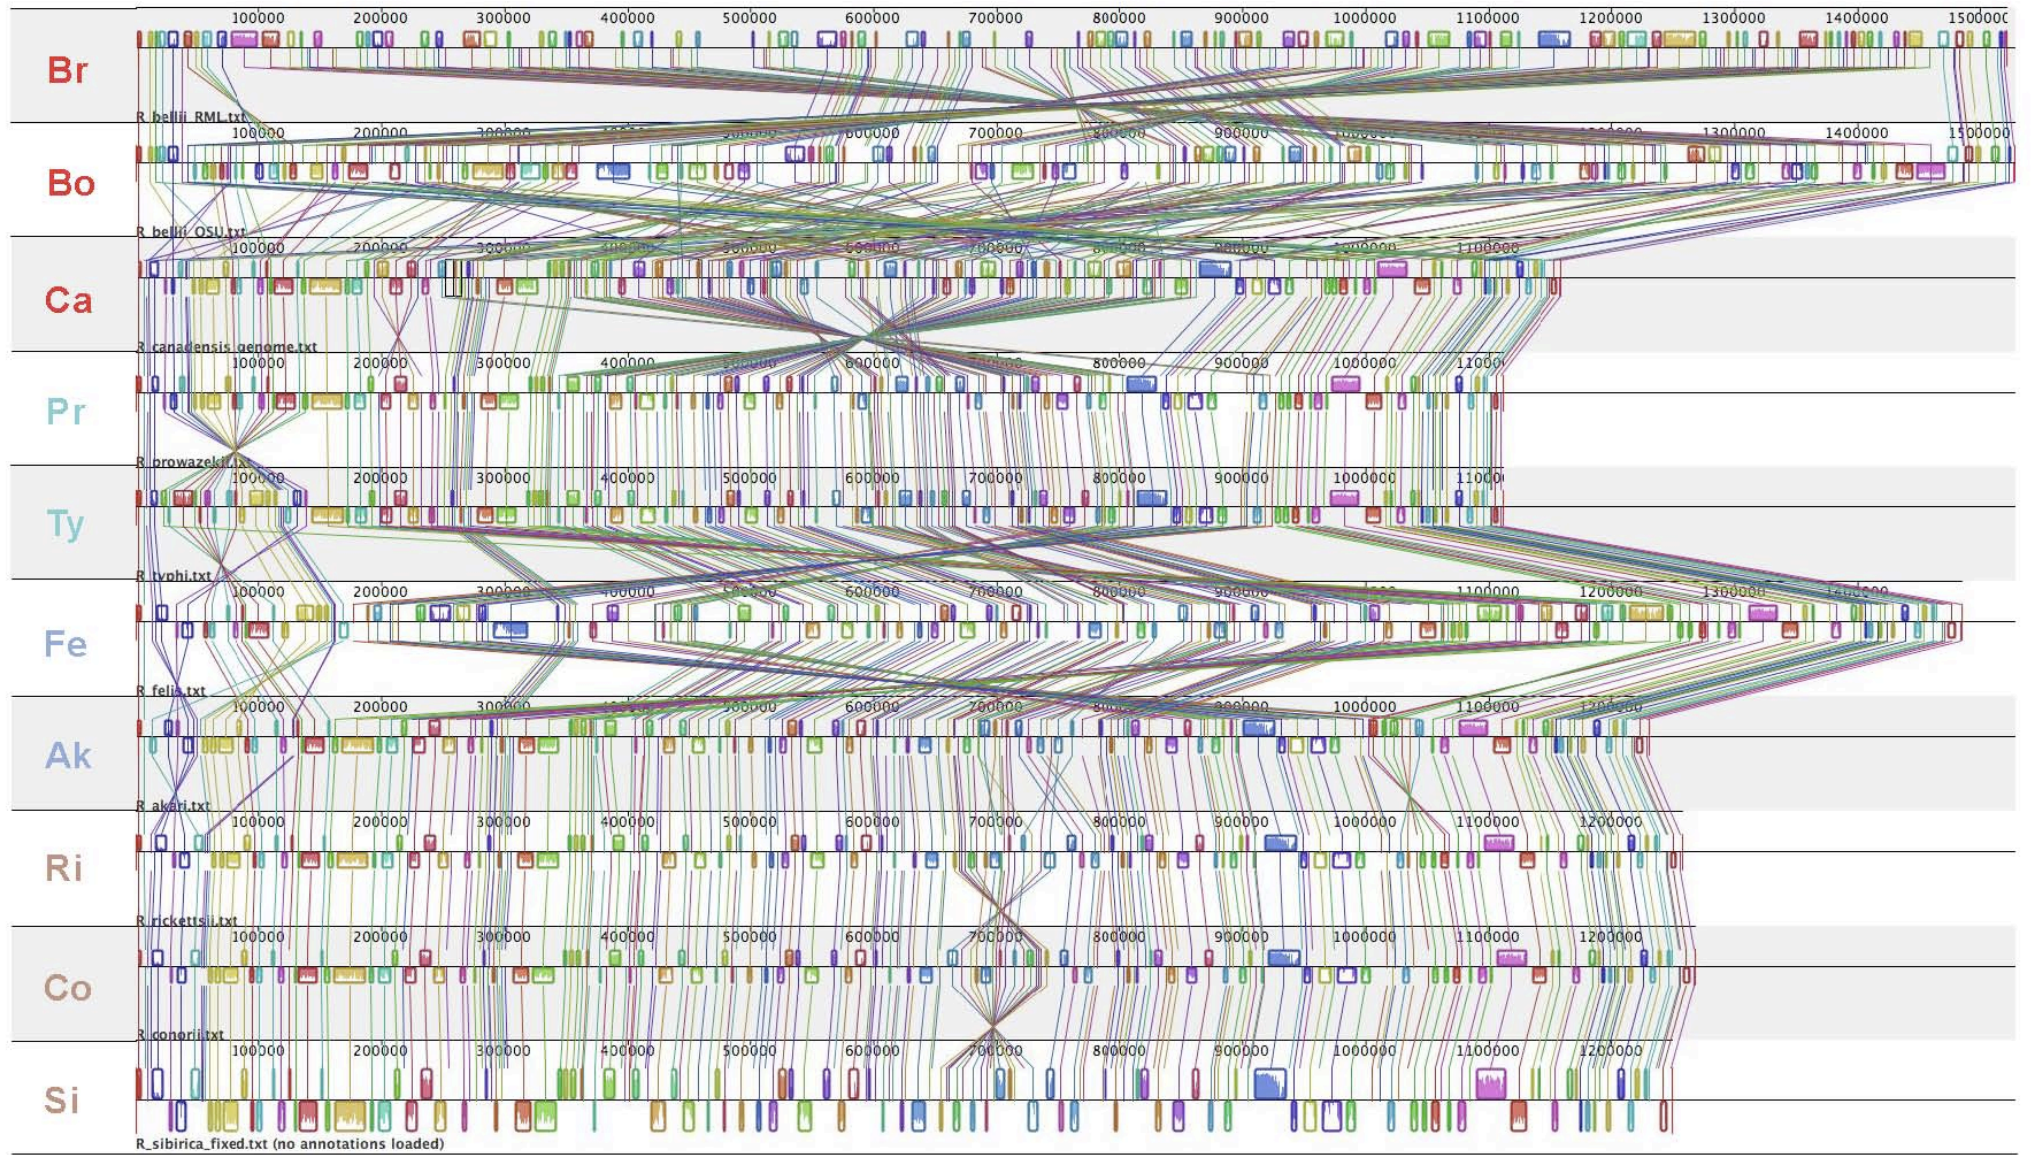

Figure S1-B

**C**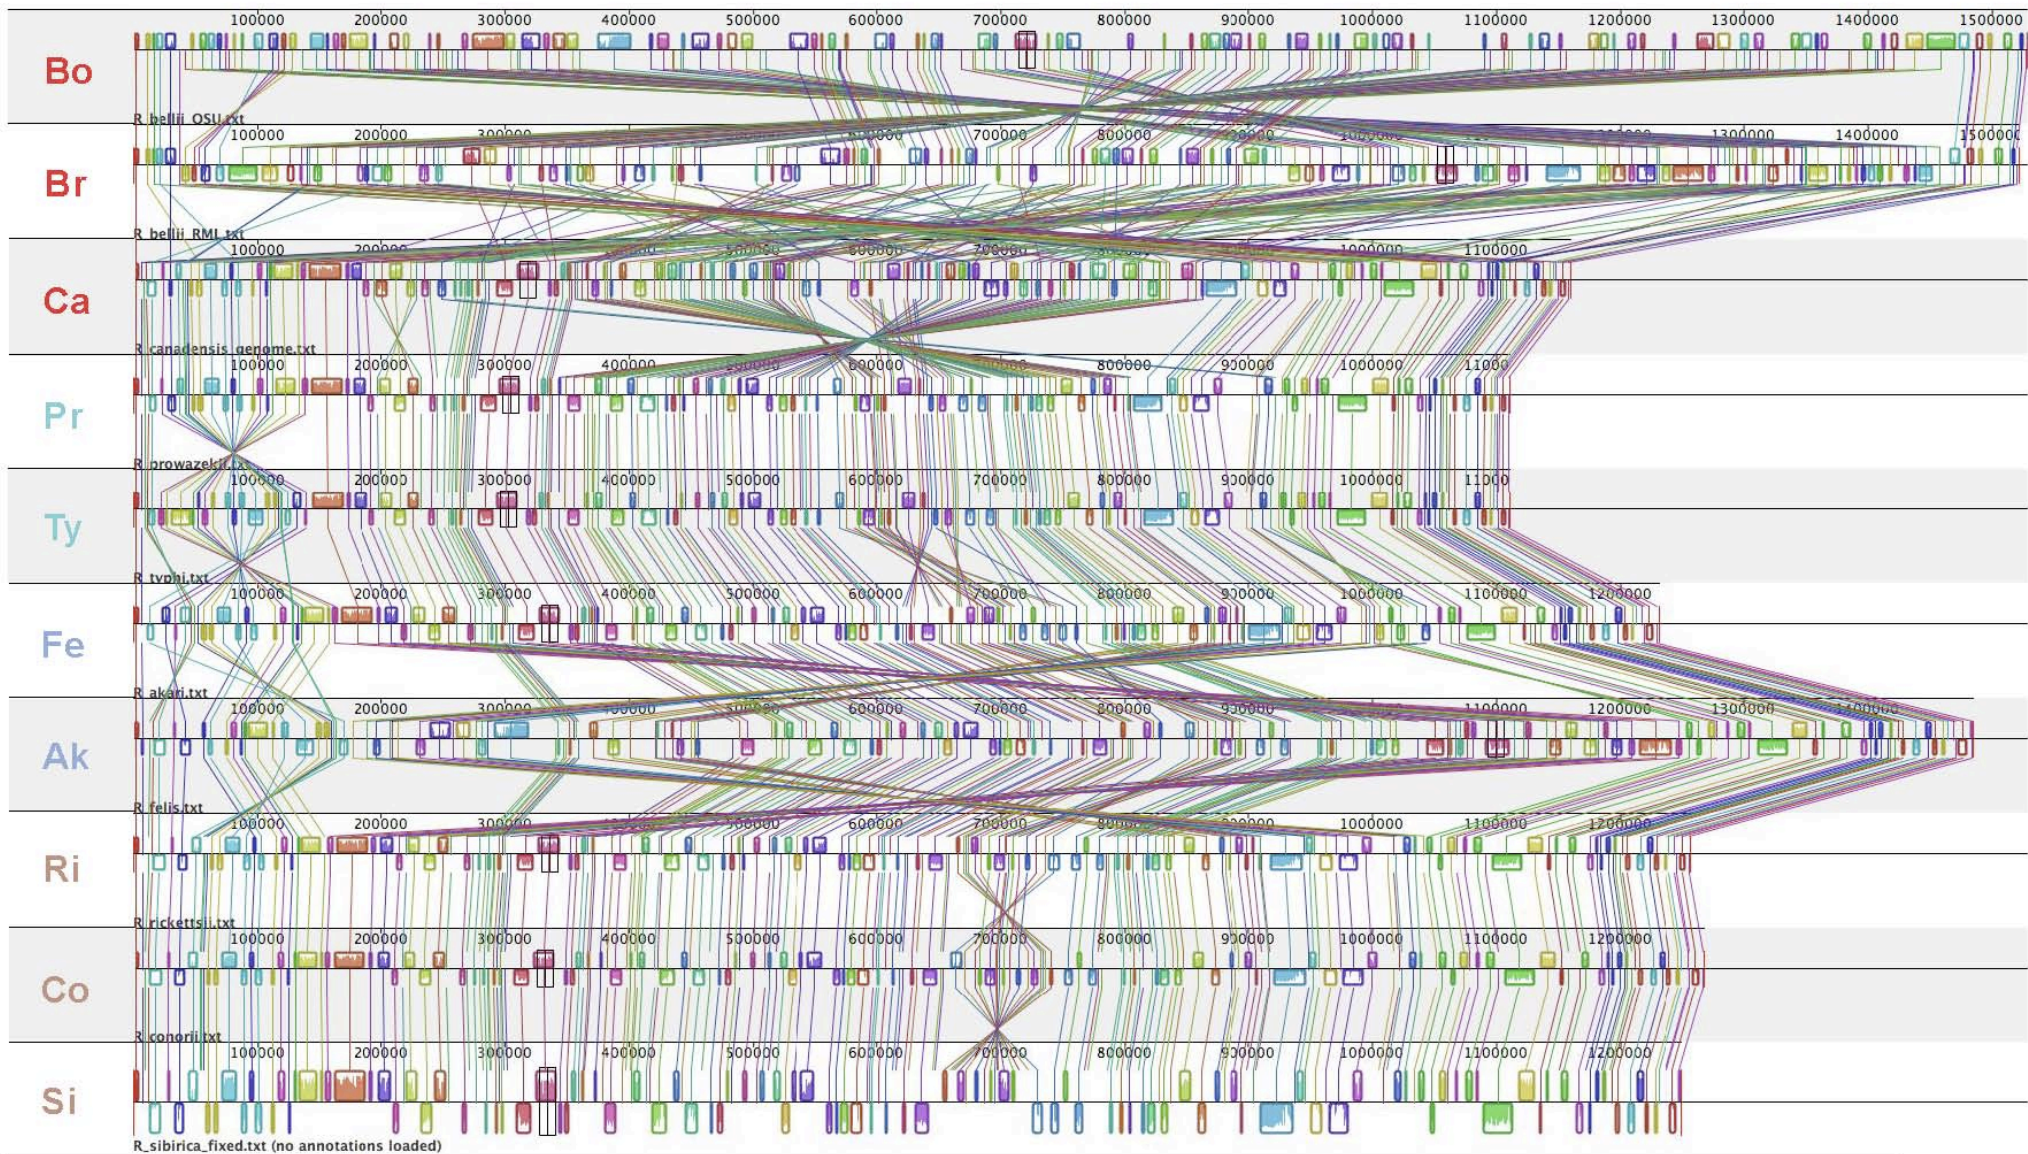

Figure S1-C

**D**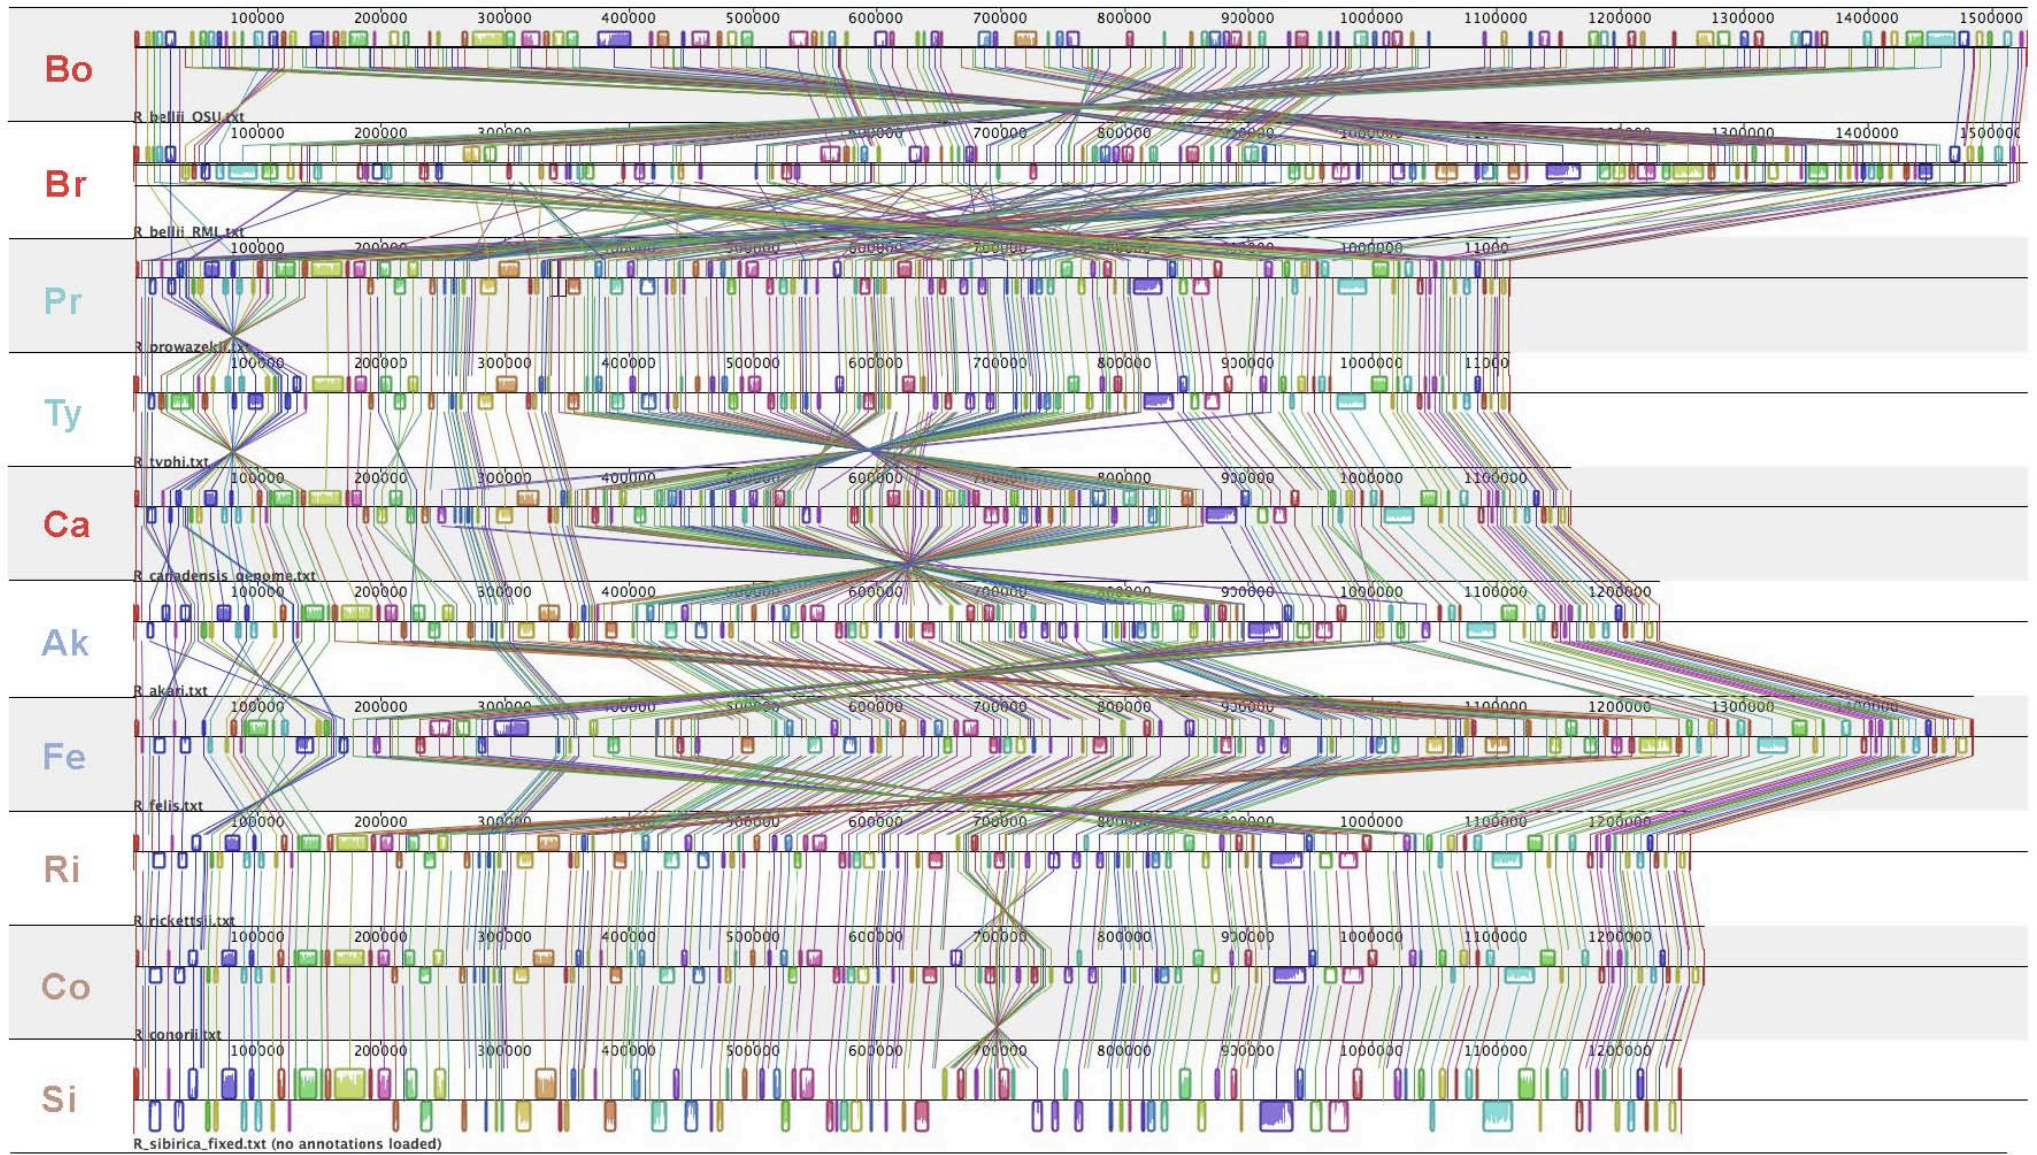

Figure S1-D

**E**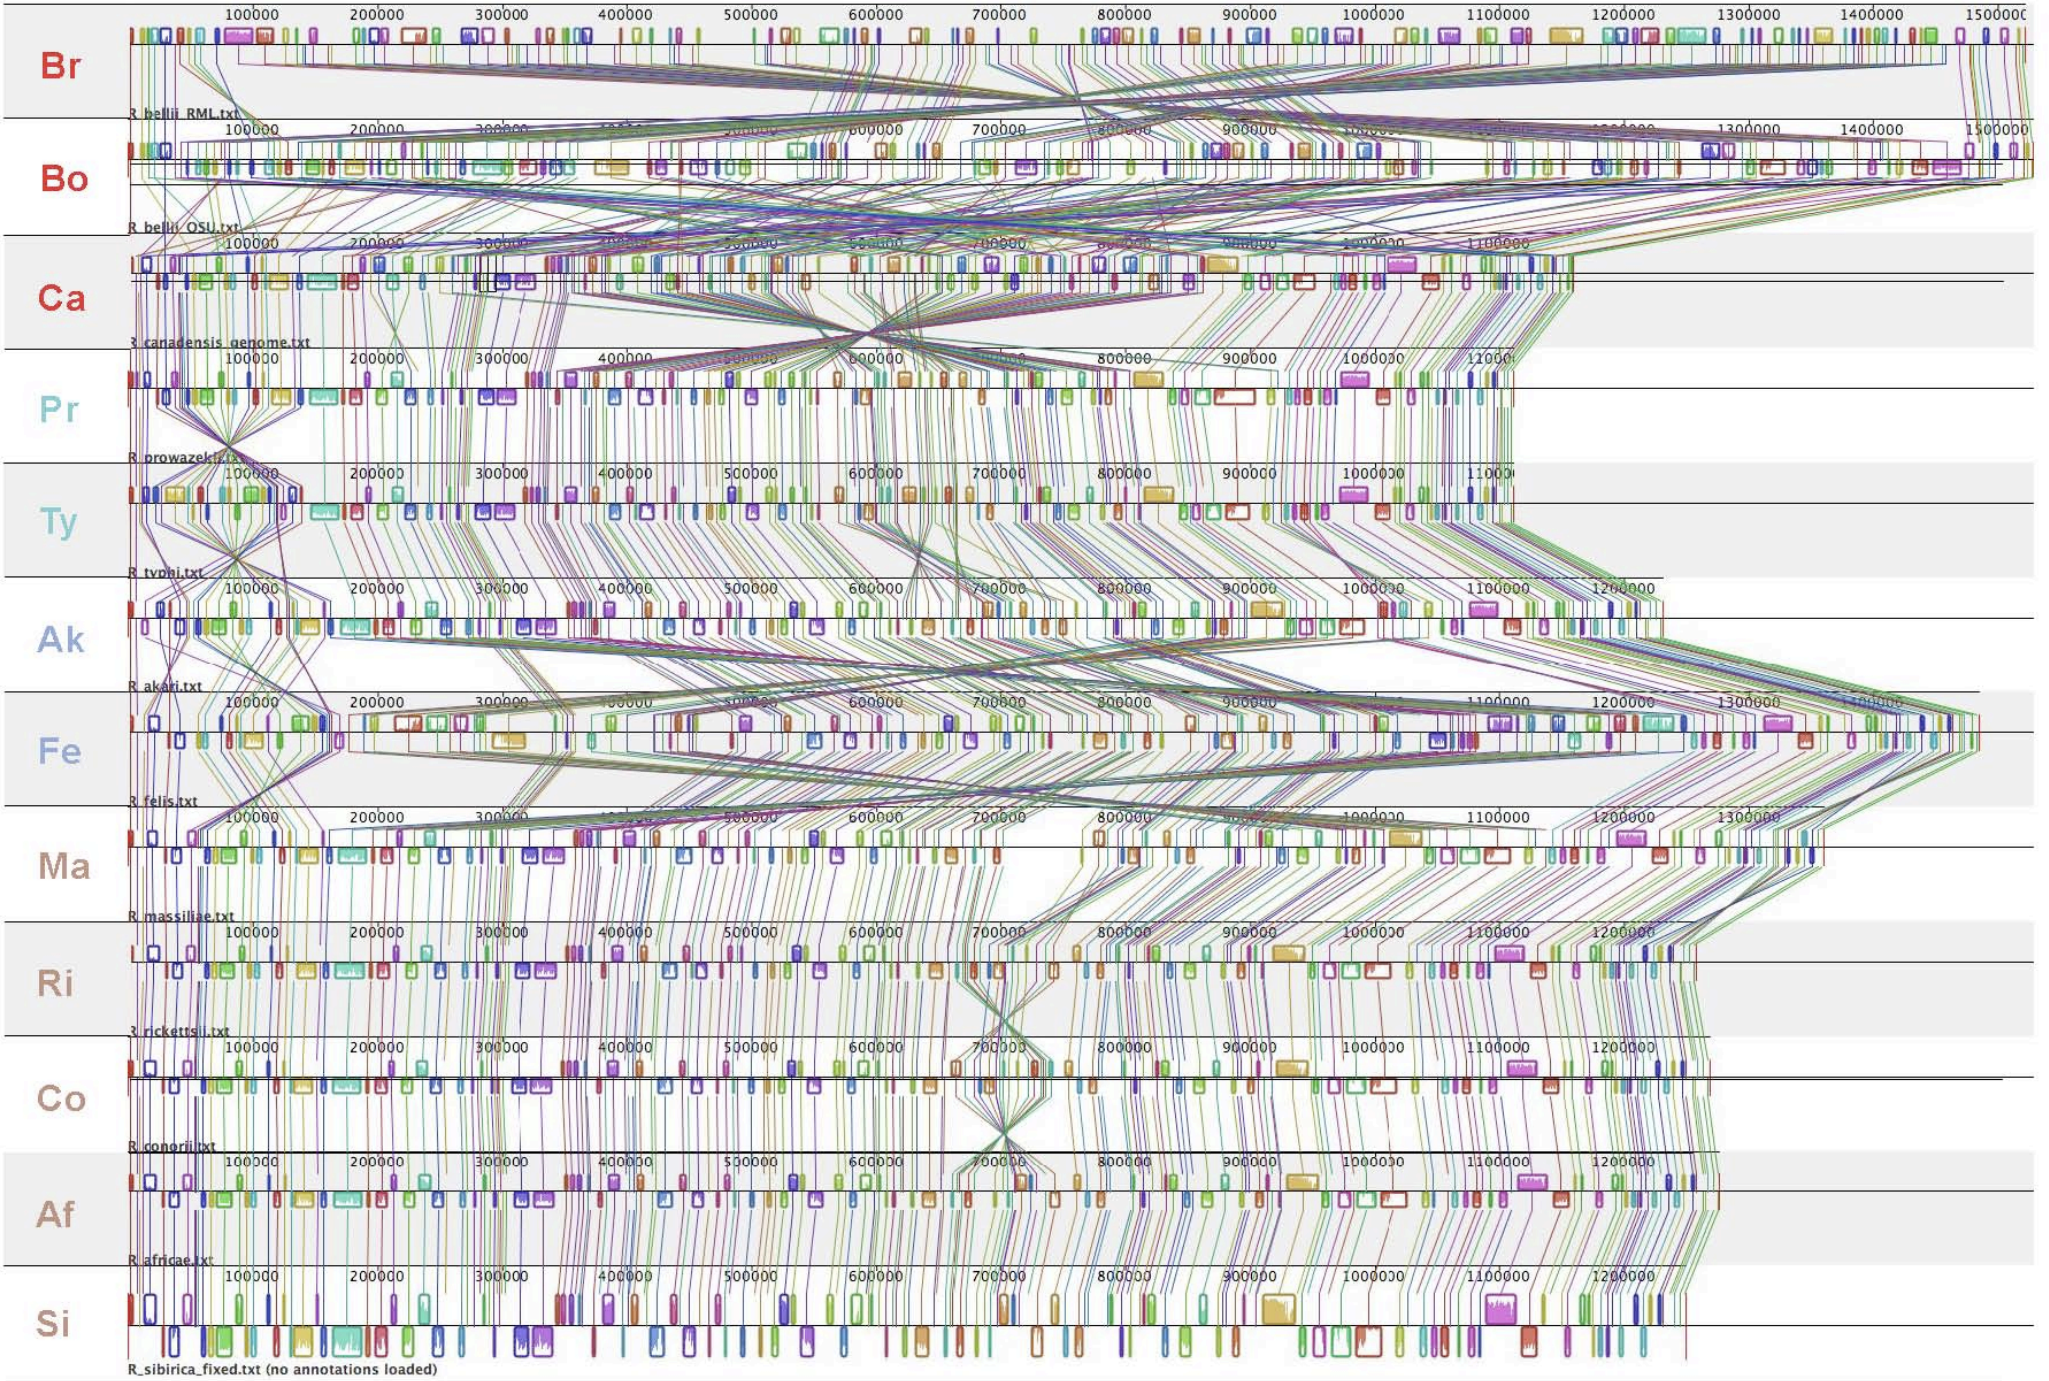

Figure S1-E
