# Supplementary material for: Rickettsia Phylogenomics: Unwinding the Intricacies of Obligate Intracellular Life
Source: PubMed Central journal article supplement (PMC2635572; doi:10.1371/journal.pone.0002018), 2008-04-16
Supplement: pone.0002018.s004.pdf [file pone.0002018.s004.pdf]

**Table S1. Distribution and characterization of predicted ORFs within 259 non-representative OGs across ten rickettsial genomes, and the results after manual curation.**

| No. ORFs | No OGs | RiOG no. | Distribution <sup>1,2</sup> |          |    |    |          |    |          |    |    |          | Designation <sup>3</sup> | Curation <sup>4</sup> |
|----------|--------|----------|-----------------------------|----------|----|----|----------|----|----------|----|----|----------|--------------------------|-----------------------|
|          |        |          | Br                          | Bo       | Ca | Pr | Ty       | Ak | Fe       | Ri | Co | Si       |                          |                       |
| 2        | 49     | 1498     | 0                           | <u>2</u> | 0  | 0  | 0        | 0  | 0        | 0  | 0  | 0        | d                        | non-rep C1OG (FS)     |
|          |        | 1499     | 0                           | <u>2</u> | 0  | 0  | 0        | 0  | 0        | 0  | 0  | 0        | d                        | non-rep C1OG (FS)     |
|          |        | 1500     | 0                           | <u>2</u> | 0  | 0  | 0        | 0  | 0        | 0  | 0  | 0        | d                        | non-rep C1OG (FS)     |
|          |        | 1501     | 0                           | <u>2</u> | 0  | 0  | 0        | 0  | 0        | 0  | 0  | 0        | d                        | non-rep C1OG (FS)     |
|          |        | 1503     | 0                           | 0        | 0  | 0  | <u>2</u> | 0  | 0        | 0  | 0  | 0        | d                        | non-rep C1OG (FS)     |
|          |        | 1504     | 0                           | 0        | 0  | 0  | 0        | 0  | 0        | 0  | 0  | <u>2</u> | d                        | non-rep C1OG (FS)     |
|          |        | 1560     | 0                           | 0        | 0  | 0  | 0        | 0  | <u>2</u> | 0  | 0  | 0        | d                        | non-rep C1OG (FS)     |
|          |        | 1564     | 0                           | 0        | 0  | 0  | 0        | 0  | <u>2</u> | 0  | 0  | 0        | d                        | non-rep C1OG (FS)     |
|          |        | 1568     | 0                           | 0        | 0  | 0  | 0        | 0  | <u>2</u> | 0  | 0  | 0        | d                        | non-rep C1OG (FS)     |
|          |        | 1569     | 0                           | 0        | 0  | 0  | 0        | 0  | <u>2</u> | 0  | 0  | 0        | d                        | non-rep C1OG (FS)     |
|          |        | 1573     | 0                           | 0        | 0  | 0  | 0        | 0  | <u>2</u> | 0  | 0  | 0        | d                        | non-rep C1OG (FS)     |
|          |        | 1574     | 0                           | 0        | 0  | 0  | 0        | 0  | <u>2</u> | 0  | 0  | 0        | d                        | non-rep C1OG (FS)     |
|          |        | 1575     | 0                           | 0        | 0  | 0  | 0        | 0  | <u>2</u> | 0  | 0  | 0        | d                        | non-rep C1OG (FS)     |
|          |        | 1577     | 0                           | 0        | 0  | 0  | 0        | 0  | <u>2</u> | 0  | 0  | 0        | d                        | non-rep C1OG (FS)     |
|          |        | 1578     | 0                           | 0        | 0  | 0  | 0        | 0  | <u>2</u> | 0  | 0  | 0        | 1 (pRF), no pRFδ         | rep C1OG (S)          |
|          |        | 1579     | 0                           | 0        | 0  | 0  | 0        | 0  | <u>2</u> | 0  | 0  | 0        | 1 (pRF), no pRFδ         | rep C1OG (S)          |
|          |        | 1580     | 0                           | 0        | 0  | 0  | 0        | 0  | <u>2</u> | 0  | 0  | 0        | 1 (pRF), no pRFδ         | rep C1OG (S)          |
|          |        | 1581     | 0                           | 0        | 0  | 0  | 0        | 0  | <u>2</u> | 0  | 0  | 0        | 1 (pRF), no pRFδ         | rep C1OG (S)          |
|          |        | 1582     | 0                           | 0        | 0  | 0  | 0        | 0  | <u>2</u> | 0  | 0  | 0        | 1 (pRF), no pRFδ         | rep C1OG (S)          |
|          |        | 1583     | 0                           | 0        | 0  | 0  | 0        | 0  | <u>2</u> | 0  | 0  | 0        | 1 (pRF), no pRFδ         | rep C1OG (S)          |
|          |        | 1584     | 0                           | 0        | 0  | 0  | 0        | 0  | <u>2</u> | 0  | 0  | 0        | 1 (pRF), no pRFδ         | rep C1OG (S)          |
|          |        | 1585     | 0                           | 0        | 0  | 0  | 0        | 0  | <u>2</u> | 0  | 0  | 0        | 1 (pRF), no pRFδ         | rep C1OG (S)          |
|          |        | 1586     | 0                           | 0        | 0  | 0  | 0        | 0  | <u>2</u> | 0  | 0  | 0        | 1 (pRF), no pRFδ         | rep C1OG (S)          |
|          |        | 1587     | 0                           | 0        | 0  | 0  | 0        | 0  | <u>2</u> | 0  | 0  | 0        | 1 (pRF), no pRFδ         | rep C1OG (S)          |
|          |        | 1588     | 0                           | 0        | 0  | 0  | 0        | 0  | <u>2</u> | 0  | 0  | 0        | 1 (pRF), no pRFδ         | rep C1OG (S)          |
|          |        | 1589     | 0                           | 0        | 0  | 0  | 0        | 0  | <u>2</u> | 0  | 0  | 0        | 1 (pRF), no pRFδ         | rep C1OG (S)          |
|          |        | 1590     | 0                           | 0        | 0  | 0  | 0        | 0  | <u>2</u> | 0  | 0  | 0        | 1 (pRF), no pRFδ         | rep C1OG (S)          |
|          |        | 1591     | 0                           | 0        | 0  | 0  | 0        | 0  | <u>2</u> | 0  | 0  | 0        | 1 (pRF), no pRFδ         | rep C1OG (S)          |
|          |        | 1592     | 0                           | 0        | 0  | 0  | 0        | 0  | <u>2</u> | 0  | 0  | 0        | 1 (pRF), no pRFδ         | rep C1OG (S)          |

|      |          |          |   |   |   |          |          |   |   |   |                       |                      |
|------|----------|----------|---|---|---|----------|----------|---|---|---|-----------------------|----------------------|
| 1593 | 0        | 0        | 0 | 0 | 0 | 0        | <u>2</u> | 0 | 0 | 0 | 1 (pRF), no pRFδ      | rep C1OG (S)         |
| 1594 | 0        | 0        | 0 | 0 | 0 | 0        | <u>2</u> | 0 | 0 | 0 | 1 (pRF), no pRFδ      | rep C1OG (S)         |
| 1595 | 0        | 0        | 0 | 0 | 0 | 0        | <u>2</u> | 0 | 0 | 0 | 1 (pRF), no pRFδ      | rep C1OG (S)         |
| 1596 | 0        | 0        | 0 | 0 | 0 | 0        | <u>2</u> | 0 | 0 | 0 | 1 (pRF), no pRFδ      | rep C1OG (S)         |
| 1597 | 0        | 0        | 0 | 0 | 0 | 0        | <u>2</u> | 0 | 0 | 0 | 1 (pRF), no pRFδ      | rep C1OG (S)         |
| 1598 | 0        | 0        | 0 | 0 | 0 | 0        | <u>2</u> | 0 | 0 | 0 | 1 (pRF), no pRFδ      | rep C1OG (S)         |
| 1599 | 0        | 0        | 0 | 0 | 0 | 0        | <u>2</u> | 0 | 0 | 0 | 1 (pRF), no pRFδ      | rep C1OG (S)         |
| 1600 | 0        | 0        | 0 | 0 | 0 | 0        | <u>2</u> | 0 | 0 | 0 | 1 (pRF), no pRFδ      | rep C1OG (S)         |
| 1601 | 0        | 0        | 0 | 0 | 0 | 0        | <u>2</u> | 0 | 0 | 0 | 1 (pRF), no pRFδ      | rep C1OG (S)         |
| 1602 | 0        | 0        | 0 | 0 | 0 | 0        | <u>2</u> | 0 | 0 | 0 | 1 (pRF), no pRFδ      | rep C1OG (S)         |
| 1603 | 0        | 0        | 0 | 0 | 0 | 0        | <u>2</u> | 0 | 0 | 0 | 1 (pRF), no pRFδ      | rep C1OG (S)         |
| 1604 | 0        | 0        | 0 | 0 | 0 | 0        | <u>2</u> | 0 | 0 | 0 | 1 (pRF), no pRFδ      | rep C1OG (S)         |
| 1605 | 0        | 0        | 0 | 0 | 0 | 0        | <u>2</u> | 0 | 0 | 0 | 1 (pRF), no pRFδ      | rep C1OG (S)         |
| 1606 | 0        | 0        | 0 | 0 | 0 | 0        | <u>2</u> | 0 | 0 | 0 | 1 (pRF), no pRFδ      | rep C1OG (S)         |
| 1607 | 0        | 0        | 0 | 0 | 0 | 0        | <u>2</u> | 0 | 0 | 0 | 1 (pRF), no pRFδ      | rep C1OG (S)         |
| 1608 | 0        | 0        | 0 | 0 | 0 | 0        | <u>2</u> | 0 | 0 | 0 | 1 (pRF), no pRFδ      | rep C1OG (S)         |
| 1609 | 0        | 0        | 0 | 0 | 0 | 0        | <u>2</u> | 0 | 0 | 0 | 1 (pRF), no pRFδ      | rep C1OG (S)         |
| 1610 | 0        | 0        | 0 | 0 | 0 | 0        | <u>2</u> | 0 | 0 | 0 | 1 (pRF), no pRFδ      | rep C1OG (S)         |
| 1740 | <u>2</u> | 0        | 0 | 0 | 0 | 0        | 0        | 0 | 0 | 0 | d                     | non-rep C1OG (FS)    |
| 2073 | 0        | 0        | 0 | 0 | 0 | <u>2</u> | 0        | 0 | 0 | 0 | d                     | non-rep C1OG (FS)    |
| 1276 | 0        | 0        | 0 | 0 | 0 | 0        | <u>3</u> | 0 | 0 | 0 | d(2)                  | non-rep C1OG (FS)    |
| 1277 | 0        | 0        | 0 | 0 | 0 | 0        | <u>3</u> | 0 | 0 | 0 | d(2)                  | non-rep C1OG (FS)    |
| 1278 | 0        | 1        | 0 | 0 | 0 | 0        | <u>2</u> | 0 | 0 | 0 | 1 (pRF), no pRFδ      | rep C2OG; A15        |
| 1279 | 0        | 0        | 0 | 0 | 0 | 0        | <u>3</u> | 0 | 0 | 0 | d (pRF), no pRFδ      | non-rep C1OG (FS)    |
| 1280 | 0        | 0        | 0 | 0 | 0 | 0        | <u>3</u> | 0 | 0 | 0 | 2 (Fe & pRF), no pRFδ | non-rep C1OG (FS)    |
| 1281 | 0        | 0        | 0 | 0 | 0 | 0        | <u>3</u> | 0 | 0 | 0 | 2 (Fe & pRF), no pRFδ | non-rep C1OG (FS)    |
| 1282 | 0        | 0        | 0 | 0 | 0 | 0        | <u>3</u> | 0 | 0 | 0 | d (pRF), no pRFδ      | non-rep C1OG (FS)    |
| 1283 | 0        | 0        | 0 | 0 | 0 | 0        | <u>3</u> | 0 | 0 | 0 | d (pRF), no pRFδ      | non-rep C1OG (FS)    |
| 1401 | 0        | 0        | 1 | 0 | 0 | 0        | <u>2</u> | 0 | 0 | 0 | 1 (pRF), no pRFδ      | rep C2OG; A12        |
| 1402 | 0        | 0        | 1 | 0 | 0 | 0        | <u>2</u> | 0 | 0 | 0 | 1 (pRF), no pRFδ      | rep C2OG; A12        |
| 1409 | 1        | <u>2</u> | 0 | 0 | 0 | 0        | 0        | 0 | 0 | 0 | s                     | rep C1OG; bellii     |
| 1419 | 1        | <u>2</u> | 0 | 0 | 0 | 0        | 0        | 0 | 0 | 0 | s                     | rep C1OG; bellii     |
| 1440 | <u>2</u> | 1        | 0 | 0 | 0 | 0        | 0        | 0 | 0 | 0 | d                     | non-rep C1OG; bellii |
| 1483 | 0        | 0        | 0 | 0 | 0 | 1        | <u>2</u> | 0 | 0 | 0 | d                     | non-rep C1OG; TRG    |

|      |          |          |          |          |          |          |          |          |          |          |          |                      |                                   |                       |
|------|----------|----------|----------|----------|----------|----------|----------|----------|----------|----------|----------|----------------------|-----------------------------------|-----------------------|
| 4    | 12       | 1156     | 0        | 0        | 0        | 0        | 0        | 0        | 0        | 1        | <u>2</u> | 1                    | s                                 | rep C1OG; SFG         |
|      |          | 1157     | 0        | 0        | 0        | 0        | 0        | 0        | 0        | <u>1</u> | <u>2</u> | <u>1</u>             | t; s; t                           | rep C1OG; SFG         |
|      |          | 1163     | 0        | 0        | 0        | 0        | 0        | 0        | 0        | <u>1</u> | <u>2</u> | <u>1</u>             | s                                 | rep C1OG; SFG         |
|      |          | 1167     | 0        | 0        | 0        | 0        | 0        | 0        | 0        | <u>2</u> | <u>1</u> | <u>1</u>             | s                                 | rep C1OG; SFG         |
|      |          | 1173     | 0        | 0        | 0        | 0        | 0        | 0        | 0        | <u>1</u> | <u>1</u> | <u>2</u>             | t; s                              | rep C1OG; SFG         |
|      |          | 1184     | 0        | 0        | <u>2</u> | 0        | 0        | 0        | 0        | 0        | <u>1</u> | <u>1</u>             | s                                 | rep C2OG; B11         |
|      |          | 1204     | 1        | 1        | 0        | 0        | 0        | 0        | <u>2</u> | 0        | 0        | 0                    | d                                 | non-rep C1OG; plasmid |
|      |          | 1209     | 1        | <u>2</u> | 0        | 0        | 0        | 0        | <u>1</u> | 0        | 0        | 0                    | s                                 | rep C1OG; plasmid     |
|      |          | 1210     | 1        | <u>2</u> | 0        | 0        | 0        | 0        | 1        | 0        | 0        | 0                    | d                                 | non-rep C1OG; plasmid |
|      |          | 1223     | 0        | 0        | 1        | 0        | 0        | 1        | <u>2</u> | 0        | 0        | 0                    | 1 (pRF), no pRF $\delta$          | rep C2OG; B15         |
|      |          | 1234     | 0        | 0        | 0        | 0        | 0        | 1        | 1        | 0        | <u>2</u> | 0                    | d                                 | non-rep C2OG; B8      |
|      |          | 1264     | 0        | 0        | 0        | 0        | 0        | <u>2</u> | 1        | 1        | 0        | 0                    | s                                 | rep C2OG; B9          |
| 5    | 28       | 1055     | 0        | 0        | 0        | 0        | 0        | 1        | <u>2</u> | 0        | <u>2</u> | s; s                 | rep C2OG; B2                      |                       |
|      |          | 1056     | 0        | 0        | 0        | 0        | 0        | 1        | <u>2</u> | 0        | <u>2</u> | s; s                 | rep C2OG; B2                      |                       |
|      |          | 1057     | 0        | 0        | 0        | 0        | 0        | 0        | <u>5</u> | 0        | 0        | 0                    | 2 (pRF; 1 s), no pRF $\delta$ (2) | non-rep C1OG (FS)     |
|      |          | 1058     | 0        | 0        | 0        | 0        | 0        | 0        | 0        | 1        | <u>2</u> | <u>2</u>             | s; s                              | rep C1OG; SFG         |
|      |          | 1059     | 0        | 0        | 0        | 0        | 0        | 0        | 1        | <u>1</u> | <u>2</u> | <u>1</u>             | t; s                              | rep C2OG; C1          |
|      |          | 1060     | 0        | 0        | 0        | 0        | 0        | 0        | <u>2</u> | 1        | 1        | <u>1</u>             | s; t                              | rep C2OG; C1          |
|      |          | 1061     | 0        | 0        | 0        | 0        | 0        | 0        | 1        | <u>1</u> | 1        | <u>2</u>             | t; s                              | rep C2OG; C1          |
|      |          | 1062     | 0        | 0        | 0        | 0        | 0        | 0        | 0        | <u>2</u> | <u>2</u> | 1                    | d; d                              | non-rep C1OG; SFG     |
|      |          | 1064     | 0        | 0        | <u>2</u> | 0        | 0        | 0        | 1        | 1        | 0        | 1                    | s                                 | rep C2OG; C10         |
|      |          | 1065     | 0        | 0        | <u>2</u> | 0        | 0        | 0        | 0        | 1        | <u>1</u> | 1                    | s; t                              | rep C2OG; C8          |
|      |          | 1066     | 0        | 0        | <u>2</u> | 0        | 0        | 0        | 0        | 1        | 1        | 1                    | s                                 | rep C2OG; C8          |
|      |          | 1067     | 0        | 0        | <u>1</u> | 0        | 0        | 0        | 0        | 1        | 1        | <u>2</u>             | t; s                              | rep C2OG; C8          |
|      |          | 1068     | 0        | 0        | 1        | 0        | 0        | 0        | <u>2</u> | 0        | 1        | 1                    | d                                 | non-rep C2OG; C9      |
|      |          | 1073     | 1        | 1        | <u>1</u> | 0        | 0        | 0        | <u>2</u> | 0        | 0        | 0                    | t; 1 (pRF), no pRF $\delta$       | rep C2OG; C28         |
|      |          | 1081     | <u>2</u> | 1        | 0        | 0        | 0        | 0        | 0        | 0        | 1        | 1                    | s                                 | rep C2OG; C18         |
|      |          | 1085     | 1        | 1        | <u>1</u> | 0        | 0        | 0        | <u>2</u> | 0        | 0        | 0                    | t; 1 (pRF), no pRF $\delta$       | rep C2OG; C28         |
|      |          | 1086     | 1        | 1        | <u>1</u> | 0        | 0        | 0        | <u>2</u> | 0        | 0        | 0                    | t; 1 (pRF), no pRF $\delta$       | rep C2OG; C28         |
|      |          | 1088     | 1        | 1        | 0        | 0        | 0        | 0        | <u>2</u> | 0        | <u>1</u> | 0                    | s; t                              | rep C2OG; C21         |
|      |          | 1091     | <u>3</u> | <u>2</u> | 0        | 0        | 0        | 0        | 0        | 0        | 0        | 0                    | d(2); d                           | non-rep C1OG; bellii  |
|      |          | 1092     | 1        | 1        | 1        | 0        | 0        | 0        | <u>2</u> | 0        | 0        | 0                    | d                                 | non-rep C2OG; C28     |
| 1098 | <u>2</u> | <u>2</u> | 0        | 0        | 0        | 0        | 1        | 0        | 0        | 0        | d; d     | non-rep C1OG; bellii |                                   |                       |
| 1100 | 1        | 1        | 0        | 0        | 0        | <u>1</u> | <u>2</u> | 0        | 0        | 0        | t; d     | non-rep C2OG; C25    |                                   |                       |
| 1108 | 1        | 1        | 0        | 0        | 0        | 1        | 0        | <u>2</u> | 0        | 0        | d        | non-rep C2OG; C22    |                                   |                       |
| 1120 | 0        | 0        | 0        | 0        | 0        | <u>2</u> | 1        | <u>2</u> | 0        | 0        | s; s     | rep C2OG; B9         |                                   |                       |

|   |    |             |                 |                 |          |                 |          |                 |                 |                 |                 |                 |                                              |                          |
|---|----|-------------|-----------------|-----------------|----------|-----------------|----------|-----------------|-----------------|-----------------|-----------------|-----------------|----------------------------------------------|--------------------------|
|   |    | 1125        | 0               | 0               | 0        | 0               | 0        | 1               | <u>4</u>        | 0               | 0               | 0               | d(3)                                         | non-rep C1OG; TRG        |
|   |    | <b>1128</b> | <b>1</b>        | <b><u>2</u></b> | <b>0</b> | <b>0</b>        | <b>0</b> | <b>1</b>        | <b>1</b>        | <b>0</b>        | <b>0</b>        | <b>0</b>        | <b>s</b>                                     | <b>rep C2OG; C25</b>     |
|   |    | <b>1132</b> | <b>0</b>        | <b>0</b>        | <b>0</b> | <b>0</b>        | <b>0</b> | <b>1</b>        | <b>0</b>        | <b><u>2</u></b> | <b>1</b>        | <b>1</b>        | <b>s</b>                                     | <b>rep C2OG; C2</b>      |
|   |    | 1134        | 0               | 0               | 0        | 0               | 0        | <u>2</u>        | 1               | 1               | 0               | 1               | d                                            | non-rep C2OG; C4         |
| 6 | 16 | 1013        | 1               | <u>2</u>        | 0        | 0               | 0        | 0               | 0               | 1               | 1               | 1               | d                                            | non-rep C2OG; D7         |
|   |    | 1014        | 1               | 1               | 0        | 0               | 0        | 0               | <u>2</u>        | 1               | 1               | 0               | d                                            | non-rep C2OG; D9         |
|   |    | 1022        | <u>2</u>        | 1               | 1        | 0               | 0        | 0               | <u>2</u>        | 0               | 0               | 0               | d; d                                         | non-rep C2OG; C28        |
|   |    | 1024        | 0               | 0               | 0        | 0               | 0        | 1               | 1               | <u>2</u>        | 1               | 1               | d                                            | non-rep C1OG; SFG        |
|   |    | <b>1029</b> | <b>0</b>        | <b>0</b>        | <b>0</b> | <b>0</b>        | <b>0</b> | <b>1</b>        | <b><u>2</u></b> | <b>1</b>        | <b><u>1</u></b> | <b>1</b>        | <b>s; t</b>                                  | <b>rep C1OG; TRG+SFG</b> |
|   |    | <b>1030</b> | <b>0</b>        | <b>0</b>        | <b>0</b> | <b>0</b>        | <b>0</b> | <b><u>1</u></b> | <b>1</b>        | <b><u>2</u></b> | <b>1</b>        | <b>1</b>        | <b>t; s</b>                                  | <b>rep C1OG; TRG+SFG</b> |
|   |    | <b>1042</b> | <b>0</b>        | <b>0</b>        | <b>0</b> | <b>0</b>        | <b>0</b> | <b><u>2</u></b> | <b>1</b>        | <b>1</b>        | <b><u>1</u></b> | <b>1</b>        | <b>s; t</b>                                  | <b>rep C1OG; TRG+SFG</b> |
|   |    | <b>1044</b> | <b>0</b>        | <b>0</b>        | <b>0</b> | <b>0</b>        | <b>0</b> | <b><u>1</u></b> | <b><u>2</u></b> | <b>1</b>        | <b>1</b>        | <b>1</b>        | <b>t; s</b>                                  | <b>rep C1OG; TRG+SFG</b> |
|   |    | <b>1049</b> | <b>0</b>        | <b>0</b>        | <b>0</b> | <b>0</b>        | <b>0</b> | <b><u>1</u></b> | <b>0</b>        | <b><u>2</u></b> | <b>1</b>        | <b><u>2</u></b> | <b>s; s</b>                                  | <b>rep C2OG; C2</b>      |
|   |    | <b>1051</b> | <b>0</b>        | <b>0</b>        | <b>0</b> | <b>0</b>        | <b>0</b> | <b>1</b>        | <b><u>2</u></b> | <b>1</b>        | <b>1</b>        | <b>1</b>        | <b>s</b>                                     | <b>rep C1OG; TRG+SFG</b> |
|   |    | <b>1053</b> | <b>1</b>        | <b>1</b>        | <b>0</b> | <b><u>2</u></b> | <b>0</b> | <b>0</b>        | <b><u>2</u></b> | <b>0</b>        | <b>0</b>        | <b>0</b>        | <b>s; s</b>                                  | <b>rep C2OG; C27</b>     |
|   |    | <b>1054</b> | <b>1</b>        | <b><u>1</u></b> | <b>0</b> | <b>1</b>        | <b>1</b> | <b>0</b>        | <b><u>2</u></b> | <b>0</b>        | <b>0</b>        | <b>0</b>        | <b>t; 1 (pRF), no pRF<math>\delta</math></b> | <b>rep C2OG; D15</b>     |
|   |    | 993         | 0               | 0               | 0        | 0               | 0        | 0               | <u>6</u>        | 0               | 0               | 0               | d(5)                                         | non-rep C1OG (FS)        |
|   |    | 994         | 0               | 0               | 0        | 0               | 0        | 0               | <u>6</u>        | 0               | 0               | 0               | d(5)                                         | non-rep C1OG (FS)        |
|   |    | 995         | 0               | 0               | 0        | 0               | 0        | 0               | <u>6</u>        | 0               | 0               | 0               | d(5)                                         | non-rep C1OG (FS)        |
|   |    | <b>996</b>  | <b>0</b>        | <b>0</b>        | <b>0</b> | <b>0</b>        | <b>0</b> | <b>0</b>        | <b>1</b>        | <b><u>2</u></b> | <b>1</b>        | <b><u>2</u></b> | <b>s; s</b>                                  | <b>rep C2OG; C1</b>      |
| 7 | 23 | 928         | 0               | 0               | 0        | 0               | 0        | 0               | <u>7</u>        | 0               | 0               | 0               | 5 (3 Fe & 2 pRF), no pRF $\delta$ (2)        | non-rep C1OG (FS)        |
|   |    | 929         | 0               | 0               | 0        | 0               | 0        | 0               | 1               | <u>2</u>        | <u>2</u>        | <u>2</u>        | d; d; d                                      | non-rep C2OG; C1         |
|   |    | <b>930</b>  | <b>1</b>        | <b>1</b>        | <b>0</b> | <b>0</b>        | <b>0</b> | <b>0</b>        | <b>1</b>        | <b><u>2</u></b> | <b>1</b>        | <b>1</b>        | <b>s</b>                                     | <b>rep C2OG; E6</b>      |
|   |    | 932         | <u>2</u>        | 1               | 0        | 0               | 0        | 0               | 0               | <u>2</u>        | 1               | 1               | d; s                                         | non-rep C2OG; D7         |
|   |    | 933         | 1               | 0               | 0        | 0               | 0        | 0               | <u>2</u>        | 1               | 1               | <u>2</u>        | d; d                                         | non-rep C2OG; D6         |
|   |    | 935         | <u>6</u>        | 1               | 0        | 0               | 0        | 0               | 0               | 0               | 0               | 0               | d(5)                                         | non-rep C1OG; bellii     |
|   |    | <b>936</b>  | <b>1</b>        | <b>1</b>        | <b>0</b> | <b>0</b>        | <b>0</b> | <b>0</b>        | <b><u>2</u></b> | <b>1</b>        | <b>1</b>        | <b>1</b>        | <b>1 (pRF), no pRF<math>\delta</math></b>    | <b>rep C2OG; E6</b>      |
|   |    | 937         | <u>6</u>        | 1               | 0        | 0               | 0        | 0               | 0               | 0               | 0               | 0               | d(5)                                         | non-rep C1OG; bellii     |
|   |    | <b>939</b>  | <b>1</b>        | <b><u>2</u></b> | <b>0</b> | <b>0</b>        | <b>0</b> | <b>0</b>        | <b>1</b>        | <b>1</b>        | <b>1</b>        | <b>1</b>        | <b>s</b>                                     | <b>rep C2OG; E6</b>      |
|   |    | <b>940</b>  | <b><u>2</u></b> | <b><u>2</u></b> | <b>0</b> | <b>0</b>        | <b>0</b> | <b>0</b>        | <b>0</b>        | <b>1</b>        | <b>1</b>        | <b>1</b>        | <b>s; s</b>                                  | <b>rep C2OG; D7</b>      |
|   |    | 942         | <u>6</u>        | 1               | 0        | 0               | 0        | 0               | 0               | 0               | 0               | 0               | d(5)                                         | non-rep C1OG; bellii     |
|   |    | <b>953</b>  | <b>0</b>        | <b>0</b>        | <b>1</b> | <b>0</b>        | <b>0</b> | <b>1</b>        | <b>1</b>        | <b>0</b>        | <b><u>2</u></b> | <b><u>2</u></b> | <b>s; s</b>                                  | <b>rep C2OG; D3</b>      |
|   |    | 954         | <u>2</u>        | 1               | 0        | 0               | 0        | 1               | 0               | 1               | 1               | 1               | d                                            | non-rep C2OG; E7         |
|   |    | <b>957</b>  | <b>0</b>        | <b>0</b>        | <b>0</b> | <b>0</b>        | <b>0</b> | <b>1</b>        | <b>1</b>        | <b>1</b>        | <b><u>2</u></b> | <b><u>2</u></b> | <b>s; s</b>                                  | <b>rep C1OG; TRG+SFG</b> |
|   |    | <b>959</b>  | <b>0</b>        | <b>1</b>        | <b>0</b> | <b>0</b>        | <b>0</b> | <b><u>2</u></b> | <b>1</b>        | <b>1</b>        | <b>1</b>        | <b>1</b>        | <b>s</b>                                     | <b>rep C2OG; E4</b>      |

|   |    |     |          |          |          |   |   |          |          |          |          |          |                       |                       |
|---|----|-----|----------|----------|----------|---|---|----------|----------|----------|----------|----------|-----------------------|-----------------------|
|   |    | 963 | 0        | 0        | 1        | 0 | 0 | 1        | 1        | 1        | 1        | <u>2</u> | s                     | rep C2OG; E3          |
|   |    | 971 | <u>2</u> | 1        | 0        | 0 | 0 | 1        | 0        | 1        | 1        | 1        | s                     | rep C2OG; E7          |
|   |    | 972 | 0        | 0        | 0        | 0 | 0 | 1        | 1        | <u>2</u> | 1        | <u>2</u> | s; s                  | rep C1OG; TRG+SFG     |
|   |    | 976 | 1        | 1        | 0        | 0 | 0 | <u>2</u> | 1        | 1        | 1        | 0        | s                     | rep C2OG; E10         |
|   |    | 981 | 0        | 0        | <u>1</u> | 0 | 0 | <u>2</u> | 1        | 1        | 1        | 1        | t; s                  | rep C2OG; E3          |
|   |    | 983 | 1        | 1        | <u>1</u> | 0 | 0 | <u>2</u> | <u>2</u> | 0        | 0        | 0        | t; s; s               | rep C1OG; AG+TRG      |
|   |    | 984 | 0        | 0        | <u>2</u> | 0 | 0 | <u>2</u> | 0        | 1        | 1        | 1        | s; s; t               | rep C2OG; D2          |
|   |    | 986 | 1        | 1        | 0        | 0 | 0 | 1        | 1        | <u>2</u> | 0        | 1        | s                     | rep C2OG; E9          |
| 8 | 21 | 863 | 1        | 1        | 0        | 0 | 0 | 0        | 1        | 1        | <u>2</u> | <u>2</u> | s; s                  | rep C2OG; E6          |
|   |    | 864 | 1        | 1        | 0        | 0 | 0 | 0        | <u>2</u> | 1        | 1        | <u>2</u> | d; s                  | non-rep C2OG; E6      |
|   |    | 865 | 1        | 1        | 0        | 0 | 0 | 0        | <u>2</u> | <u>2</u> | 1        | 1        | s; s                  | rep C2OG; E6          |
|   |    | 866 | 1        | 1        | <u>1</u> | 0 | 0 | 0        | 0        | <u>1</u> | <u>2</u> | <u>2</u> | t; t; s; s            | rep C1OG; tick        |
|   |    | 868 | 1        | 1        | 0        | 0 | 0 | <u>2</u> | 1        | 1        | 1        | 1        | s                     | rep C2OG; F3          |
|   |    | 869 | 1        | 1        | 0        | 0 | 0 | 1        | 1        | 0        | <u>2</u> | <u>2</u> | s; s                  | rep C2OG; E8          |
|   |    | 877 | 1        | 1        | 0        | 0 | 0 | 1        | 1        | <u>2</u> | 1        | 1        | s                     | rep C2OG; F3          |
|   |    | 880 | 1        | 1        | 0        | 0 | 0 | <u>2</u> | 1        | 1        | 1        | 1        | s                     | rep C2OG; F3          |
|   |    | 881 | 1        | 1        | 0        | 0 | 0 | <u>2</u> | 1        | 1        | 1        | 1        | s; t                  | rep C2OG; F3          |
|   |    | 882 | 0        | 0        | 0        | 0 | 0 | 1        | 1        | <u>2</u> | <u>2</u> | <u>2</u> | s; s; s               | rep C1OG; TRG+SFG     |
|   |    | 883 | <u>2</u> | 1        | 0        | 0 | 0 | <u>2</u> | 1        | 0        | 1        | 1        | s; s                  | rep C2OG; E8          |
|   |    | 887 | 0        | 0        | 0        | 0 | 0 | 1        | <u>4</u> | 1        | 1        | 1        | d(3)                  | non-rep C1OG; TRG+SFG |
|   |    | 891 | <u>2</u> | 1        | 0        | 0 | 0 | <u>1</u> | 1        | 1        | 1        | 1        | s; t                  | rep C2OG; F3          |
|   |    | 893 | 1        | 1        | 0        | 0 | 0 | 1        | <u>2</u> | 1        | 1        | 1        | s                     | rep C2OG; F3          |
|   |    | 898 | 1        | 1        | 0        | 0 | 0 | <u>2</u> | 1        | 1        | 1        | 1        | s                     | rep C2OG; F3          |
|   |    | 900 | 1        | <u>2</u> | 0        | 0 | 0 | 1        | <u>2</u> | 1        | 0        | 1        | s; s                  | rep C2OG; E9          |
|   |    | 903 | 0        | 0        | 0        | 0 | 0 | 1        | 1        | <u>2</u> | <u>2</u> | <u>2</u> | s; s; s               | rep C1OG; TRG+SFG     |
|   |    | 909 | 0        | 0        | 1        | 0 | 0 | <u>2</u> | 1        | <u>2</u> | 1        | 1        | s; s                  | rep C2OG; E3          |
|   |    | 912 | 1        | 1        | 0        | 0 | 0 | 1        | <u>3</u> | <u>2</u> | 0        | 0        | d(2); d               | non-rep C2OG; D13     |
|   |    | 914 | 1        | <u>2</u> | 0        | 0 | 0 | <u>1</u> | 1        | 1        | 1        | 1        | d; t                  | non-rep C2OG; F3      |
|   |    | 920 | 1        | 1        | 1        | 1 | 0 | 0        | <u>3</u> | 1        | 0        | 0        | 2 (Fe & pRF), no pRFδ | non-rep C2OG; E15     |
| 9 | 21 | 807 | 0        | 0        | <u>1</u> | 0 | 0 | 0        | <u>2</u> | <u>2</u> | <u>3</u> | 1        | t; d; s; s(2)         | non-rep C2OG; D1      |
|   |    | 808 | 0        | 0        | <u>9</u> | 0 | 0 | 0        | 0        | 0        | 0        | 0        | d(8)                  | non-rep C1OG (FS)     |
|   |    | 809 | 1        | 1        | 1        | 0 | 0 | 0        | <u>3</u> | 1        | 1        | 1        | d(2)                  | non-rep C2OG; F5      |
|   |    | 810 | 1        | 1        | <u>1</u> | 0 | 0 | 0        | 1        | <u>2</u> | <u>2</u> | 1        | t; s; s               | rep C2OG; F5          |
|   |    | 811 | 1        | 1        | 1        | 0 | 0 | 0        | 1        | <u>2</u> | 1        | <u>2</u> | s; s                  | rep C2OG; F5          |
|   |    | 812 | 1        | 1        | <u>1</u> | 0 | 0 | 0        | 1        | <u>2</u> | 1        | <u>2</u> | t; s; s               | rep C2OG; F5          |

|    |    |     |   |   |   |   |   |   |   |   |   |   |               |                   |
|----|----|-----|---|---|---|---|---|---|---|---|---|---|---------------|-------------------|
|    |    | 813 | 1 | 1 | 0 | 0 | 0 | 0 | 0 | 2 | 2 | 3 | s; s; s(2)    | rep C2OG; D7      |
|    |    | 814 | 2 | 2 | 1 | 0 | 0 | 1 | 0 | 1 | 1 | 1 | d; d; t       | non-rep C2OG; F6  |
|    |    | 816 | 1 | 2 | 1 | 0 | 0 | 1 | 1 | 1 | 1 | 1 | s             | rep C1OG; -TG     |
|    |    | 817 | 1 | 1 | 1 | 0 | 0 | 2 | 0 | 2 | 1 | 1 | s; s          | rep C2OG; F6      |
|    |    | 818 | 1 | 1 | 2 | 0 | 0 | 1 | 1 | 1 | 1 | 1 | s             | rep C1OG; -TG     |
|    |    | 819 | 1 | 1 | 2 | 0 | 0 | 1 | 1 | 1 | 1 | 1 | s             | rep C1OG; -TG     |
|    |    | 820 | 3 | 3 | 0 | 0 | 0 | 1 | 1 | 0 | 1 | 0 | d(2); d(2); t | non-rep C2OG; D12 |
|    |    | 821 | 1 | 1 | 0 | 0 | 0 | 2 | 1 | 2 | 1 | 1 | s; s          | rep C2OG; F3      |
|    |    | 822 | 1 | 1 | 1 | 0 | 0 | 1 | 2 | 1 | 1 | 1 | s             | rep C1OG; -TG     |
|    |    | 823 | 1 | 1 | 1 | 0 | 0 | 1 | 2 | 1 | 1 | 1 | t; t; d       | non-rep C1OG      |
|    |    | 824 | 1 | 1 | 1 | 0 | 0 | 1 | 1 | 2 | 1 | 1 | t; s          | rep C1OG; -TG     |
|    |    | 826 | 0 | 0 | 2 | 0 | 0 | 1 | 1 | 1 | 2 | 2 | s; s; s       | rep C2OG; E3      |
|    |    | 829 | 1 | 1 | 0 | 0 | 0 | 1 | 1 | 2 | 2 | 1 | s; s          | rep C2OG; F3      |
|    |    | 830 | 1 | 1 | 1 | 0 | 0 | 2 | 1 | 1 | 1 | 1 | s             | rep C1OG; -TG     |
|    |    | 844 | 0 | 1 | 0 | 1 | 1 | 1 | 1 | 0 | 2 | 2 | s; s          | rep C2OG; F2      |
| 10 | 17 | 388 | 1 | 1 | 1 | 2 | 1 | 1 | 1 | 0 | 1 | 1 | t; s          | rep C2OG; H7      |
|    |    | 449 | 1 | 1 | 0 | 1 | 1 | 1 | 1 | 1 | 2 | 1 | t; s; t       | rep C2OG; H3      |
|    |    | 59  | 1 | 1 | 0 | 0 | 0 | 0 | 1 | 3 | 2 | 2 | s(2); s; s    | rep C2OG; E6      |
|    |    | 60  | 1 | 1 | 1 | 0 | 0 | 0 | 1 | 2 | 2 | 2 | t; s; s; s    | rep C2OG; F5      |
|    |    | 61  | 1 | 2 | 0 | 0 | 0 | 0 | 1 | 2 | 2 | 2 | s; s; s; s    | rep C2OG; E6      |
|    |    | 62  | 1 | 1 | 1 | 0 | 0 | 2 | 1 | 2 | 1 | 1 | t; s; s       | rep C1OG; -TG     |
|    |    | 63  | 1 | 1 | 1 | 0 | 0 | 1 | 2 | 1 | 2 | 1 | t; d; s       | non-rep C1OG      |
|    |    | 64  | 1 | 2 | 0 | 0 | 0 | 1 | 1 | 2 | 1 | 2 | s; s; s       | rep C2OG; F3      |
|    |    | 65  | 1 | 1 | 0 | 0 | 0 | 1 | 1 | 2 | 2 | 2 | d; d; d       | non-rep C2OG; F3  |
|    |    | 66  | 1 | 1 | 0 | 0 | 0 | 1 | 1 | 2 | 2 | 2 | t; s; s; s    | rep C2OG; F3      |
|    |    | 67  | 1 | 1 | 1 | 0 | 0 | 2 | 1 | 1 | 1 | 2 | s; t; s       | rep C1OG; -TG     |
|    |    | 68  | 2 | 2 | 0 | 0 | 0 | 2 | 1 | 1 | 1 | 1 | s; s; s; t    | rep C2OG; F3      |
|    |    | 69  | 1 | 1 | 0 | 0 | 0 | 1 | 2 | 2 | 3 | 0 | t; s; s; s(2) | rep C2OG; E10     |
|    |    | 70  | 1 | 1 | 0 | 0 | 0 | 2 | 1 | 2 | 2 | 1 | s; s; s; t    | rep C2OG; F3      |
|    |    | 71  | 1 | 1 | 0 | 0 | 0 | 2 | 1 | 2 | 2 | 1 | s; s; s       | rep C2OG; F3      |
|    |    | 72  | 1 | 1 | 1 | 0 | 0 | 3 | 1 | 1 | 1 | 1 | t; s(2)       | rep C1OG; -TG     |
|    |    | 73  | 1 | 1 | 1 | 0 | 0 | 2 | 1 | 1 | 1 | 2 | t; s; s       | rep C1OG; -TG     |
| 11 | 24 | 35  | 1 | 1 | 0 | 0 | 0 | 0 | 1 | 2 | 3 | 3 | s; s(2); s(2) | rep C2OG; E6      |
|    |    | 36  | 1 | 1 | 1 | 0 | 0 | 0 | 1 | 2 | 3 | 2 | t; s; s(2); s | rep C2OG; F5      |
|    |    | 37  | 1 | 1 | 2 | 0 | 0 | 1 | 2 | 2 | 1 | 1 | s; s; s       | rep C1OG; -TG     |

|    |    |          |          |          |          |          |          |           |          |          |               |                    |                  |                    |
|----|----|----------|----------|----------|----------|----------|----------|-----------|----------|----------|---------------|--------------------|------------------|--------------------|
| 38 | 1  | 1        | <u>1</u> | 0        | 0        | <u>1</u> | <u>2</u> | 1         | <u>2</u> | <u>2</u> | t; t; s; s; s | rep C1OG; -TG      |                  |                    |
| 39 | 1  | 1        | <u>1</u> | 0        | 0        | <u>1</u> | <u>1</u> | <u>2</u>  | <u>2</u> | <u>2</u> | s; s; s       | rep C1OG; -TG      |                  |                    |
| 40 | 1  | 1        | 0        | 0        | 0        | <u>2</u> | 1        | <u>2</u>  | <u>2</u> | <u>2</u> | s; s; s; s    | rep C2OG; F3       |                  |                    |
| 41 | 1  | 1        | 0        | 0        | 0        | <u>1</u> | <u>2</u> | <u>2</u>  | <u>2</u> | <u>2</u> | s; s; s; s    | rep C2OG; F3       |                  |                    |
| 42 | 1  | 1        | 0        | 0        | 0        | <u>1</u> | <u>2</u> | <u>3</u>  | <u>2</u> | 1        | t; s; s; s    | rep C2OG; F3       |                  |                    |
| 43 | 1  | <u>2</u> | 1        | 1        | 1        | <u>1</u> | 1        | 1         | 1        | 1        | s             | rep C1OG; core     |                  |                    |
| 44 | 1  | <u>1</u> | <u>2</u> | 1        | 1        | 1        | 1        | 1         | 1        | 1        | s             | rep C1OG; core     |                  |                    |
| 45 | 1  | 1        | 1        | 1        | 1        | 1        | 1        | 1         | 1        | <u>2</u> | s             | rep C1OG; core     |                  |                    |
| 46 | 1  | 1        | 1        | 1        | <u>2</u> | 1        | 1        | 1         | 1        | 1        | d             | non-rep C1OG; core |                  |                    |
| 47 | 1  | <u>2</u> | 1        | 1        | 1        | 1        | 1        | 1         | 1        | 1        | s             | rep C1OG; core     |                  |                    |
| 48 | 1  | 1        | <u>2</u> | 1        | 1        | 1        | 1        | 0         | 1        | <u>2</u> | s; s          | rep C2OG; H7       |                  |                    |
| 49 | 1  | 1        | <u>2</u> | 1        | 1        | 1        | 1        | 1         | 1        | 1        | s             | rep C1OG; core     |                  |                    |
| 50 | 1  | 1        | 1        | 1        | <u>2</u> | 0        | <u>3</u> | 0         | <u>1</u> | <u>1</u> | s; s(2); t; t | rep C2OG; G7       |                  |                    |
| 51 | 1  | 1        | 1        | 1        | 1        | 1        | 1        | 0         | <u>2</u> | <u>2</u> | s; s          | rep C2OG; H7       |                  |                    |
| 52 | 1  | <u>2</u> | 1        | 1        | 1        | 1        | 1        | 1         | 1        | 1        | s             | rep C1OG; core     |                  |                    |
| 53 | 1  | 1        | 1        | 1        | 1        | <u>2</u> | 1        | 1         | 1        | 1        | s             | rep C1OG; core     |                  |                    |
| 54 | 1  | 1        | 1        | 1        | 1        | 1        | 1        | <u>2</u>  | 1        | 1        | s             | rep C1OG; core     |                  |                    |
| 55 | 1  | <u>2</u> | 1        | 1        | 1        | 1        | 1        | 1         | 1        | 1        | s             | rep C1OG; core     |                  |                    |
| 56 | 1  | 1        | 1        | 1        | 1        | 1        | <u>2</u> | 1         | 1        | 1        | d             | non-rep C1OG; core |                  |                    |
| 57 | 1  | <u>2</u> | 1        | 1        | 1        | 1        | 1        | 1         | 1        | 1        | s             | rep C1OG; core     |                  |                    |
| 58 | 1  | <u>2</u> | 1        | 1        | 1        | 1        | 1        | 1         | 1        | 1        | s             | rep C1OG; core     |                  |                    |
| 12 | 14 | 21       | 1        | 1        | <u>2</u> | 0        | 0        | 0         | 1        | <u>3</u> | <u>2</u>      | <u>2</u>           | s; s(2); s; s    | rep C2OG; F5       |
|    |    | 22       | <u>2</u> | <u>2</u> | 0        | 0        | 0        | <u>2</u>  | <u>2</u> | 1        | <u>2</u>      | 1                  | d; d; d; d; d    | non-rep C2OG; F3   |
|    |    | 23       | 0        | 0        | 0        | 0        | 1        | 1         | <u>2</u> | <u>3</u> | <u>2</u>      | <u>3</u>           | s; s(2); s; s(2) | rep C2OG; E1       |
|    |    | 24       | 1        | 1        | <u>2</u> | 0        | 0        | <u>2</u>  | <u>2</u> | 0        | <u>2</u>      | <u>2</u>           | s; s; s; s; s    | rep C2OG; F7       |
|    |    | 25       | 1        | 1        | <u>1</u> | 0        | 0        | <u>2</u>  | 1        | <u>2</u> | <u>2</u>      | <u>2</u>           | t; s; s; s; s    | rep C1OG; -TG      |
|    |    | 26       | 0        | 0        | 0        | 0        | 0        | <u>12</u> | 0        | 0        | 0             | 0                  | d(11)            | non-rep C1OG (FS)  |
|    |    | 27       | 0        | 0        | 0        | 0        | 0        | <u>12</u> | 0        | 0        | 0             | 0                  | d(11)            | non-rep C1OG (FS)  |
|    |    | 28       | <u>2</u> | 1        | 0        | 0        | 0        | <u>3</u>  | 1        | <u>2</u> | <u>2</u>      | 1                  | s; s(2); s; s    | rep C2OG; F3       |
|    |    | 29       | <u>2</u> | <u>2</u> | 1        | 1        | 1        | 1         | 1        | 1        | 1             | 1                  | s; s             | rep C1OG; core     |
|    |    | 30       | 1        | <u>3</u> | 1        | 1        | 1        | 1         | 1        | 1        | 1             | 1                  | s(2)             | rep C1OG; core     |
|    |    | 31       | 1        | 1        | 1        | 1        | 1        | <u>2</u>  | <u>2</u> | 1        | 1             | 1                  | d; d             | non-rep C1OG; core |
|    |    | 32       | <u>2</u> | 1        | 0        | 1        | 1        | <u>1</u>  | 1        | <u>2</u> | 1             | <u>2</u>           | s; t; s; s       | rep C2OG; H3       |
|    |    | 33       | 1        | 1        | <u>2</u> | 1        | 1        | <u>1</u>  | <u>2</u> | 1        | 1             | 1                  | d; d             | non-rep C1OG; core |
|    |    | 34       | <u>1</u> | <u>1</u> | 1        | <u>2</u> | 1        | <u>2</u>  | 1        | 1        | 1             | 1                  | t; t; s; s       | rep C1OG; core     |

|    |   |    |           |           |          |   |          |           |           |          |          |          |                                       |                      |                      |
|----|---|----|-----------|-----------|----------|---|----------|-----------|-----------|----------|----------|----------|---------------------------------------|----------------------|----------------------|
| 13 | 6 | 15 | <u>1</u>  | <u>1</u>  | <u>2</u> | 0 | 0        | <u>3</u>  | <u>1</u>  | <u>2</u> | <u>1</u> | <u>2</u> | s; s(2); s; s                         | rep C1OG; -TG        |                      |
|    |   | 16 | <u>2</u>  | <u>2</u>  | <u>2</u> | 0 | 0        | <u>2</u>  | <u>1</u>  | <u>1</u> | <u>2</u> | <u>1</u> | s; s; s; s; s                         | rep C1OG; -TG        |                      |
|    |   | 17 | <u>2</u>  | <u>1</u>  | <u>1</u> | 0 | 0        | <u>2</u>  | <u>1</u>  | <u>2</u> | <u>2</u> | <u>2</u> | s; t; s; s; s; s                      | rep C1OG; -TG        |                      |
|    |   | 18 | <u>2</u>  | <u>1</u>  | <u>1</u> | 0 | 0        | <u>1</u>  | <u>2</u>  | <u>2</u> | <u>2</u> | <u>2</u> | s; t; s; s; s; s                      | rep C1OG; -TG        |                      |
|    |   | 19 | <u>1</u>  | <u>1</u>  | 0        | 1 | 1        | <u>2</u>  | <u>1</u>  | <u>2</u> | <u>2</u> | <u>2</u> | d; s; s; s                            | non-rep C2OG; H3     |                      |
|    |   | 20 | <u>1</u>  | <u>1</u>  | <u>1</u> | 1 | 1        | <u>1</u>  | <u>1</u>  | <u>2</u> | <u>2</u> | <u>2</u> | s; s; s                               | rep C1OG; core       |                      |
| 14 | 5 | 10 | <u>1</u>  | <u>1</u>  | <u>2</u> | 0 | 0        | <u>1</u>  | <u>1</u>  | <u>3</u> | <u>4</u> | <u>1</u> | s; t; s(2); s(3)                      | rep C1OG; -TG        |                      |
|    |   | 11 | <u>2</u>  | <u>2</u>  | 0        | 0 | 0        | <u>1</u>  | <u>3</u>  | <u>2</u> | <u>2</u> | <u>2</u> | d; d; d(2); d; d; d                   | non-rep C2OG; F3     |                      |
|    |   | 12 | <u>2</u>  | <u>1</u>  | 0        | 0 | 0        | <u>3</u>  | <u>1</u>  | <u>2</u> | <u>2</u> | <u>3</u> | s; s(2); s; s; s(2)                   | rep C2OG; F3         |                      |
|    |   | 13 | <u>2</u>  | <u>1</u>  | <u>2</u> | 0 | 0        | <u>3</u>  | <u>1</u>  | <u>1</u> | <u>2</u> | <u>2</u> | s; s; s(2); s; s                      | rep C1OG; -TG        |                      |
|    |   | 14 | <u>1</u>  | <u>1</u>  | <u>2</u> | 1 | 1        | <u>2</u>  | <u>1</u>  | <u>1</u> | <u>2</u> | <u>2</u> | s; s; s; s                            | rep C1OG; core       |                      |
| 15 | 3 | 7  | <u>1</u>  | <u>14</u> | 0        | 0 | 0        | 0         | 0         | 0        | 0        | 0        | d(13)                                 | non-rep C1OG; bellii |                      |
|    |   | 8  | <u>12</u> | <u>3</u>  | 0        | 0 | 0        | 0         | 0         | 0        | 0        | 0        | 0                                     | d(11); d(2)          | non-rep C1OG; bellii |
|    |   | 9  | <u>2</u>  | <u>2</u>  | <u>1</u> | 1 | 1        | 0         | <u>1</u>  | <u>3</u> | <u>2</u> | <u>2</u> | s; s; t; s(2); s; s                   | rep C2OG; H6         |                      |
| 17 | 1 | 6  | 0         | 0         | 0        | 0 | 0        | <u>17</u> | 0         | 0        | 0        | d(16)    | non-rep C1OG (FS)                     |                      |                      |
| 18 | 3 | 3  | 0         | <u>18</u> | 0        | 0 | 0        | 0         | 0         | 0        | 0        | 0        | d(17)                                 | non-rep C1OG (FS)    |                      |
|    |   | 4  | <u>1</u>  | <u>2</u>  | <u>1</u> | 0 | 0        | <u>3</u>  | <u>1</u>  | <u>4</u> | <u>3</u> | <u>3</u> | s; s(2); s(3); s(2); s(2)             | rep C1OG; -TG        |                      |
|    |   | 5  | <u>1</u>  | <u>1</u>  | <u>1</u> | 1 | 1        | <u>4</u>  | <u>4</u>  | <u>2</u> | <u>1</u> | <u>2</u> | s(3); s(3); s; s                      | rep C1OG; core       |                      |
| 23 | 1 | 2  | <u>1</u>  | <u>1</u>  | <u>3</u> | 0 | <u>1</u> | <u>3</u>  | <u>1</u>  | <u>4</u> | <u>4</u> | <u>5</u> | t; t; s(2); t; s(2); s(3); s(3); s(4) | rep C2OG; H4         |                      |
| 31 | 1 | 1  | <u>2</u>  | <u>1</u>  | 0        | 0 | 0        | <u>1</u>  | <u>27</u> | 0        | 0        | 0        | d; 24 (s(3))                          | non-rep C2OG; C25    |                      |

<sup>1</sup> Underscored numbers are described sequentially (left to right) under Designation.

<sup>2</sup> Taxon abbreviations are explained in the **Figure 1** legend.

<sup>3</sup> d = gene duplication; s = split gene; t = truncated gene.

<sup>4</sup> Status after concatenation of split ORFs and removal of redundant pRF $\delta$  ORFs: rep = representative, non-rep = non-representative, C1OG = class 1 OG, C2OG = class 2 OG, (S) = singleton, (FS) = false singleton. OGs made representative after curation are bolded. Names for C1OGs follow the description in **Figure 5** and **Figure 7**. Alphanumeric following C2OGs depict less conserved distributions of OG members across the rickettsial tree (see **Figure S2**).
