# Supplementary material for: Rickettsia Phylogenomics: Unwinding the Intricacies of Obligate Intracellular Life
Source: PubMed Central journal article supplement (PMC2635572; doi:10.1371/journal.pone.0002018), 2008-04-16
Supplement: pone.0002018.s006.pdf [file pone.0002018.s006.pdf]

**Table S3. OGs present only in the *R. bellii* genomes.**

| <b>OG<sup>1</sup></b> | <b>Annotation (312)<sup>2</sup></b>                                           |
|-----------------------|-------------------------------------------------------------------------------|
| 1848                  | Angiotensinogen-1 precursor                                                   |
| 1783                  | ATPase (AAA+ superfamily)-like                                                |
| 1768                  | ATP-dependent Clp protease proteolytic subunit                                |
| 1789                  | ATP-dependent Clp protease proteolytic subunit                                |
| 1797                  | Bifunctional penicillin-binding protein 1C                                    |
| 1996                  | Caldesmon                                                                     |
| 1713                  | Cassette chromosome recombinase B                                             |
| 1948                  | COG0477: Permeases of the major facilitator superfamily                       |
| 1773                  | Deoxyribodipyrimidine photo-lyase                                             |
| 1817                  | DNA-cytosine methyltransferase                                                |
| 1998                  | Ethylene receptor 2                                                           |
| 1712                  | F-box/LRR-repeat protein 13                                                   |
| 1759                  | Filamentation induced by cAMP protein Fic                                     |
| 1920                  | Glycoprotein X precursor                                                      |
| 1876                  | Guanosine polyphosphate pyrophosphohydrolase/synthetase                       |
| 1869                  | Guanosine-3',5'-bis(diphosphate) 3'-pyrophosphohydrolase                      |
| <u>1440</u>           | GTP pyrophosphokinase                                                         |
| 2024                  | Heavy metal tolerance protein precursor                                       |
| 1771                  | Inversin                                                                      |
| 1718                  | Inversin-B                                                                    |
| 1842                  | Methionyl-tRNA synthetase                                                     |
| 1988                  | methyltransferase, FkbM family                                                |
| 1932                  | Myosin heavy chain, non-muscle                                                |
| 1813                  | O-acetyl transferase                                                          |
| 1971                  | peptide deformylase                                                           |
| 1764                  | phenylalanine-4-hydroxylase                                                   |
| 2019                  | Phenylserine dehydratase                                                      |
| 1757                  | Poly-beta-hydroxybutyrate polymerase                                          |
| 1973                  | PREDICTED: retinoblastoma binding protein 9                                   |
| 1865                  | Putative hemagglutinin protein                                                |
| 1933                  | Quaternary ammonium compound-resistance protein sugE                          |
| 1860                  | rare lipoprotein A precursor                                                  |
| 1735                  | Restriction endonuclease S subunits                                           |
| 1804                  | Restriction modification system DNA specificity domain                        |
| 1815                  | Ribosomal protein L11 methyltransferase                                       |
| 1776                  | Sulfatase                                                                     |
| 1767                  | Type I restriction enzyme EcoR124II M protein                                 |
| 1717                  | Type I restriction-modification system methyltransferase subunit              |
| 1976                  | Type I restriction-modification system methyltransferase subunit              |
| 1725                  | Type I site-specific restriction-modification system, R (restriction) subunit |
| 1812                  | UvrABC system protein C                                                       |
| 1833                  | probable ABC transporter nitrate permease                                     |
| 1907                  | ABC transporter ATP-binding protein Uup, erythromycin resistance              |
| 1818                  | ABC-type anion transport system permease component                            |
| 1944                  | sodium/pantothenate symporter                                                 |
| 1965                  | Citrate-proton symporter                                                      |
| 1845                  | MFS type sugar transporter                                                    |
| 1955                  | MFS type sugar transporter                                                    |
| 2007                  | MFS type sugar transporter                                                    |
| 1969                  | multidrug resistance protein B                                                |
| 1835                  | Reticulocyte-binding protein 1 precursor                                      |

|            |                                                                  |
|------------|------------------------------------------------------------------|
| 1734       | Outer membrane protein A precursor                               |
| 1753       | Ankyrin repeat                                                   |
| 1772       | Ankyrin repeat                                                   |
| 1808       | Ankyrin repeat                                                   |
| 1875       | Ankyrin repeat                                                   |
| 1958       | Ankyrin repeat                                                   |
| 1962       | Ankyrin repeat domain-containing protein 1                       |
| 1939       | Ankyrin repeat domain-containing protein 18A                     |
| 1798       | Ankyrin repeat domain-containing protein 28                      |
| 1897       | Ankyrin repeat domain-containing protein 36A                     |
| 1979       | Ankyrin repeat domain-containing protein 44                      |
| 1830       | Tetratricopeptide repeat-containing protein                      |
| 1861       | Tetratricopeptide repeat-containing protein                      |
| 1926       | Tetratricopeptide repeat-containing protein                      |
| 1726       | LexA repressor                                                   |
| 1715       | transcription regulator containing helix turn helix domain       |
| 1992       | Cytotoxic translational repressor of toxin-antitoxin system RelE |
| 2014       | Transcriptional activator protein yukR                           |
| 1828       | transcriptional regulator, AbrB family                           |
| 1896       | transcriptional regulator, AbrB family                           |
| 1800       | Caspase recruitment domain-containing protein 15                 |
| 1914       | Caspase recruitment domain-containing protein 15                 |
| 1982       | Caspase recruitment domain-containing protein 15                 |
| 2009       | Caspase recruitment domain-containing protein 15                 |
| 1820       | Prophage antirepressor                                           |
| <u>7</u>   | Pilin gene-inverting protein                                     |
| 1791       | type-F conjugative transfer system pilin assembly protein TrbC   |
| 1814       | Conjugative transfer protein TraE                                |
| 1741       | F pilus assembly protein TraF                                    |
| 1792       | F pilus assembly protein TraH                                    |
| 1748       | TraU                                                             |
| 1852       | Conjugative transfer protein TraV                                |
| 1849       | type-F conjugative transfer system protein TraW                  |
| 1870       | F pilin acetylation protein TraX                                 |
| 1912       | Chitinase                                                        |
| 1858       | Transposase and inactivated derivative                           |
| 1942       | Transposase and inactivated derivative                           |
| 1850       | similar to transposase                                           |
| <u>8</u>   | similar to transposase                                           |
| 1091       | similar to transposase                                           |
| <u>935</u> | similar to transposase                                           |
| <u>937</u> | similar to transposase                                           |
| <u>942</u> | similar to transposase                                           |
| 1868       | conserved hypothetical protein                                   |
| 1946       | conserved hypothetical protein                                   |
| 1827       | Hypothetical protein, conserved                                  |

<sup>1</sup> Underscored RiOGs depict non-representative OGs.

<sup>2</sup> Including 222 representative HPs and two non-representative HPs.
