# Supplementary material for: Rickettsia Phylogenomics: Unwinding the Intricacies of Obligate Intracellular Life
Source: PubMed Central journal article supplement (PMC2635572; doi:10.1371/journal.pone.0002018), 2008-04-16
Supplement: pone.0002018.s007.pdf [file pone.0002018.s007.pdf]

**Table S4. Distribution of putative toxin-antitoxin (TA) systems within the rickettsial OGs predicted by OrthoMCL\*.**

| TA System      | Toxin     | RiOG no.         | Distribution |      |    |    |    |    |    |    |    |    | Antitoxin | RiOG no.  | Distribution |      |     |    |    |    |    |    |    |    |   |
|----------------|-----------|------------------|--------------|------|----|----|----|----|----|----|----|----|-----------|-----------|--------------|------|-----|----|----|----|----|----|----|----|---|
|                |           |                  | Br           | Bo   | Ca | Pr | Ty | Ak | Fe | Ri | Co | Si |           |           | Br           | Bo   | Ca  | Pr | Ty | Ak | Fe | Ri | Co | Si |   |
| <i>relBE</i>   | RelE      | 1992             | 1            | 1    | 0  | 0  | 0  | 0  | 0  | 0  | 0  | 0  | 0         | RelB/DinJ | 1153         | 0    | 0   | 0  | 0  | 0  | 0  | 1  | 1  | 1  | 1 |
|                |           | 1251             | 1            | 1    | 0  | 0  | 0  | 1  | 1  | 0  | 0  | 0  | 1169      |           | 0            | 0    | 0   | 0  | 0  | 0  | 1  | 1  | 1  | 1  |   |
|                |           | 3672             | 0            | 0    | 0  | 0  | 0  | 0  | 1  | 0  | 0  | 0  | StbD      |           | 1273         | 0    | 0   | 0  | 0  | 0  | 0  | 1  | 1  | 0  | 1 |
|                |           | 1262             | 1            | 1    | 0  | 0  | 0  | 1  | 1  | 0  | 0  | 0  | 1256      |           | 1            | 1    | 0   | 0  | 0  | 1  | 1  | 0  | 0  | 0  |   |
|                |           | 3832             | 0            | 0    | 0  | 0  | 0  | 0  | 1  | 0  | 0  | 0  | 1118      |           | 0            | 0    | 0   | 0  | 0  | 1  | 1  | 1  | 1  | 1  |   |
|                | RelE/StbE | 1560             | 0            | 0    | 0  | 0  | 0  | 0  | 2  | 0  | 0  | 0  | StbD-like |           | 977          | 1    | 1   | 0  | 0  | 0  | 1  | 1  | 1  | 1  | 1 |
|                |           | 1487             | 0            | 0    | 1  | 0  | 0  | 1  | 1  | 0  | 0  | 0  | 2056      |           | 0            | 0    | 0   | 0  | 0  | 1  | 1  | 0  | 0  | 0  |   |
|                |           |                  |              |      |    |    |    |    |    |    |    |    | Txe/YoeB  |           | 2069         | 0    | 0   | 0  | 0  | 0  | 1  | 1  | 0  | 0  | 0 |
|                |           |                  |              |      |    |    |    |    |    |    |    |    | 1864      |           | 0            | 0    | 0   | 0  | 0  | 0  | 1  | 0  | 0  | 0  |   |
|                |           |                  |              |      |    |    |    |    |    |    |    |    | 975       |           | 1            | 1    | 0   | 0  | 0  | 1  | 1  | 1  | 1  | 1  |   |
| <i>phd/doc</i> | Doc       |                  |              |      |    |    |    |    |    |    |    |    | Phd       | 1446      | 1            | 1    | 0   | 0  | 0  | 0  | 1  | 0  | 0  | 0  |   |
|                |           |                  |              |      |    |    |    |    |    |    |    |    |           | 1352      | 0            | 0    | 0   | 0  | 0  | 0  | 1  | 0  | 1  | 1  |   |
|                |           |                  |              |      |    |    |    |    |    |    |    |    |           | 965       | 1            | 1    | 0   | 0  | 0  | 1  | 1  | 1  | 1  | 1  |   |
|                |           |                  |              |      |    |    |    |    |    |    |    |    |           | 1084      | 1            | 1    | 0   | 0  | 0  | 0  | 0  | 1  | 1  | 1  |   |
|                |           |                  |              |      |    |    |    |    |    |    |    |    |           | 1427      | 1            | 1    | 0   | 0  | 0  | 0  | 1  | 0  | 0  | 0  |   |
|                |           |                  |              |      |    |    |    |    |    |    |    |    |           | 1408      | 1            | 1    | 0   | 0  | 0  | 0  | 1  | 0  | 0  | 0  |   |
|                |           |                  |              |      |    |    |    |    |    |    |    |    |           | 1470      | 1            | 1    | 0   | 0  | 0  | 1  | 0  | 0  | 0  | 0  |   |
|                |           |                  |              |      |    |    |    |    |    |    |    |    |           | 1037      | 1            | 1    | 0   | 0  | 0  | 1  | 0  | 1  | 1  | 1  |   |
|                |           |                  |              |      |    |    |    |    |    |    |    |    |           | 3220      | 0            | 0    | 0   | 0  | 0  | 0  | 1  | 0  | 0  | 0  |   |
|                |           | <i>vapBC/vag</i> | VapC         | 1036 | 1  | 1  | 0  | 0  | 0  | 1  | 0  | 1  |           | 1         | 1            | VapB | 941 | 1  | 1  | 1  | 0  | 0  | 0  | 1  | 1 |
| 870            | 1         |                  |              | 1    | 1  | 0  | 0  | 1  | 1  | 1  | 1  | 1  |           |           |              |      |     |    |    |    |    |    |    |    |   |
| PDP            | 1435      |                  | 1            | 1    | 0  | 0  | 0  | 0  | 1  | 0  | 0  | 0  |           |           |              |      |     |    |    |    |    |    |    |    |   |
|                | 1135      |                  | 0            | 0    | ?  | 0  | 0  | 1  | 1  | 1  | 1  | 1  |           |           |              |      |     |    |    |    |    |    |    |    |   |
|                | 1004      |                  | 1            | 1    | 0  | 0  | 0  | 0  | 1  | 1  | 1  | 1  |           |           |              |      |     |    |    |    |    |    |    |    |   |
|                | 2066      |                  | 0            | 0    | 0  | 0  | 0  | 1  | 1  | 0  | 0  | 0  |           |           |              |      |     |    |    |    |    |    |    |    |   |
|                | 1466      |                  | 1            | 1    | 0  | 0  | 0  | 1  | 0  | 0  | 0  | 0  |           |           |              |      |     |    |    |    |    |    |    |    |   |
|                | 1266      |                  | 1            | 1    | 0  | 0  | 0  | 1  | 1  | 0  | 0  | 0  |           |           |              |      |     |    |    |    |    |    |    |    |   |
| <i>mazEF</i>   | mazF      | 1243             | 1            | 1    | 0  | 0  | 0  | 1  | 1  | 0  | 0  | 0  |           |           |              |      |     |    |    |    |    |    |    |    |   |
|                | PemK-like | 1087             | 1            | 1    | 0  | 0  | 0  | 0  | 0  | 1  | 1  | 1  |           |           |              |      |     |    |    |    |    |    |    |    |   |
| <i>parDE</i>   | ParE      |                  |              |      |    |    |    |    |    |    |    |    | ParD      | 1240      | 1            | 1    | 0   | 0  | 0  | 1  | 1  | 0  | 0  | 0  |   |

\* Following the seven typical TA gene families categorized by Gerdes et al. (2005).
