# Supplementary material for: Rickettsia Phylogenomics: Unwinding the Intricacies of Obligate Intracellular Life
Source: PubMed Central journal article supplement (PMC2635572; doi:10.1371/journal.pone.0002018), 2008-04-16
Supplement: pone.0002018.s008.pdf [file pone.0002018.s008.pdf]

**Table S5. Singletons present in the *R. bellii* str. RML369-C genome.**

| <b>RiOG</b> | <b>Annotation (97)<sup>1</sup></b>                              | <b>Size<sup>2</sup></b> |
|-------------|-----------------------------------------------------------------|-------------------------|
| 3504        | ATP synthase subunit alpha                                      | 251                     |
| 3066        | F-box/LRR-repeat protein 13                                     | 279                     |
| 2863        | Fibroin heavy chain precursor                                   | 180                     |
| 3167        | GTP-binding protein                                             | 199                     |
| 2378        | small GTP-binding protein domain                                | 216                     |
| 2131        | Modification methylase BsuRI                                    | 147                     |
| 2881        | NAD-specific glutamate dehydrogenase                            | 140                     |
| 3431        | Osmolarity sensor protein EnvZ                                  | 175                     |
| 3131        | Probable inorganic polyphosphate/ATP-NAD kinase                 | 65                      |
| 3452        | Protease 2                                                      | 141                     |
| 2180        | recombination protein F                                         | 40                      |
| 2621        | recombination protein F                                         | 43                      |
| 2300        | Membrane-fusion protein component of the RND family transporter | 82                      |
| 2887        | Proline/betaine transporter                                     | 265                     |
| 2211        | Outer membrane protein A precursor                              | 143                     |
| 3168        | Outer membrane protein B precursor                              | 75                      |
| 2819        | Cell surface antigen-like protein Sca11                         | 53                      |
| 3020        | patatin-like protein                                            | 84                      |
| 2213        | Pilin gene-inverting protein                                    | 211                     |
| 2209        | similar to transposase                                          | 237                     |
| 2747        | similar to transposase                                          | 210                     |
| 2838        | similar to transposase                                          | 137                     |
| 3531        | similar to transposase                                          | 274                     |
| 3105        | Transposase                                                     | 57                      |
| 2264        | conserved hypothetical protein                                  | 213                     |
| 2629        | conserved hypothetical protein                                  | 270                     |
| 2811        | Hypothetical protein, conserved                                 | 220                     |
| 3065        | Hypothetical protein, conserved                                 | 332                     |
| 3280        | Hypothetical protein, conserved                                 | 223                     |
| 3426        | Hypothetical protein, conserved                                 | 146                     |
| 3517        | Hypothetical protein, conserved                                 | 314                     |
|             | <b>Avg.</b>                                                     | <b>174.9</b>            |

<sup>1</sup> Including 65 singleton HPs, with average length of 65.78 amino acids, and one false singleton HP.

<sup>2</sup> Length in amino acids of predicted ORF.
