# Supplementary material for: Rickettsia Phylogenomics: Unwinding the Intricacies of Obligate Intracellular Life
Source: PubMed Central journal article supplement (PMC2635572; doi:10.1371/journal.pone.0002018), 2008-04-16
Supplement: pone.0002018.s009.pdf [file pone.0002018.s009.pdf]

**Table S6. Singletons and false singletons present in the *R. bellii* str. OSU 85 389 genome.**

| <b>RiOG<sup>1</sup></b> | <b>Annotation (112)<sup>2</sup></b>                                | <b>Size<sup>3</sup></b> |
|-------------------------|--------------------------------------------------------------------|-------------------------|
| 3113                    | 2,3,4,5-tetrahydropyridine-2,6-dicarboxylate N-succinyltransferase | 51                      |
| 3435                    | 30S ribosomal protein S5                                           | 51                      |
| 2418                    | Actin polymerization protein RickA                                 | 86                      |
| 2972                    | Actin polymerization protein RickA                                 | 62                      |
| 2953                    | Adenylate kinase                                                   | 93                      |
| 2548                    | Alanyl-tRNA synthetase                                             | 71                      |
| 2493                    | Tyrosyl-tRNA synthetase                                            | 206                     |
| 2396                    | Methionyl-tRNA formyltransferase                                   | 36                      |
| 2704                    | Chaperone protein hscA homolog                                     | 198                     |
| 2775                    | Filamentation induced by cAMP protein Fic                          | 215                     |
| 3332                    | Hemolysin C                                                        | 136                     |
| 2159                    | Lipoprotein releasing system, transmembrane protein                | 99                      |
| 3174                    | Peroxisomal targeting signal receptor                              | 367                     |
| 3382                    | predicted amidophosphoribosyltransferase                           | 34                      |
| 2119                    | Putative hemagglutinin protein                                     | 112                     |
| 3255                    | Ribonuclease HI                                                    | 46                      |
| 2253                    | RNA polymerase sigma factor rpoD                                   | 36                      |
| 2405                    | RNA polymerase sigma factor rpoD                                   | 105                     |
| 3087                    | Type I restriction enzyme EcoEI M protein                          | 107                     |
| 2345                    | Type I restriction-modification system, M subunit                  | 72                      |
| 2456                    | UbiD family decarboxylases                                         | 55                      |
| 2387                    | Putrescine-ornithine antiporter                                    | 115                     |
| 2847                    | Putrescine-ornithine antiporter                                    | 99                      |
| 2170                    | Proline/betaine transporter                                        | 153                     |
| 2311                    | Pilin gene-inverting protein                                       | 249                     |
| 2755                    | Leucine-rich repeat protein                                        | 33                      |
| 2654                    | Transposase and inactivated derivative                             | 121                     |
| <u>3</u>                | Transposase and inactivated derivative                             | NA                      |
| 2759                    | conserved hypothetical protein                                     | 169                     |
| 2764                    | Conserved hypothetical protein                                     | 115                     |
| 2891                    | conserved hypothetical protein                                     | 118                     |
| 3177                    | Conserved hypothetical protein                                     | 597                     |
| 3219                    | conserved hypothetical protein                                     | 286                     |
| 2269                    | Hypothetical protein, conserved                                    | 566                     |
|                         | <b>Avg.</b>                                                        | <b>147.24</b>           |

<sup>1</sup> Underscored RiOGs depict non-representative OGs.

<sup>2</sup> Including 79 singleton HPs, with average length of 76.70 amino acids, and four false singleton HPs.

<sup>3</sup> Length in amino acids of predicted singleton ORFs; lengths of false singletons not applicable.
