# Supplementary material for: Rickettsia Phylogenomics: Unwinding the Intricacies of Obligate Intracellular Life
Source: PubMed Central journal article supplement (PMC2635572; doi:10.1371/journal.pone.0002018), 2008-04-16
Supplement: pone.0002018.s011.pdf [file pone.0002018.s011.pdf]

**Table S8. Singletons present in the *R. prowazekii* str. Madrid E genome.**

| <b>RiOG</b> | <b>Annotation (68)<sup>1</sup></b>               | <b>Size<sup>2</sup></b> |
|-------------|--------------------------------------------------|-------------------------|
| 2320        | 190 kDa antigen precursor, putative              | 138                     |
| 2664        | 190 kDa antigen precursor, putative              | 165                     |
| 2818        | Ankyrin Repeat family protein                    | 107                     |
| 3482        | Antigenic heat-stable 120 kDa protein            | 247                     |
| 2708        | Lipid A export ATP-binding/permease protein msbA | 121                     |
| 2888        | MFS type sugar transporter, putative             | 43                      |
| 3485        | putative methyltransferase                       | 250                     |
| 2309        | tRNA pseudouridine synthase B                    | 126                     |
| 3481        | ubiquinone biosynthesis protein, putative        | 96                      |
| 2204        | Hypothetical protein, conserved                  | 91                      |
| 2347        | Hypothetical protein, conserved                  | 60                      |
| 2717        | Hypothetical protein, conserved                  | 67                      |
|             | <b>Avg.</b>                                      | <b>125.92</b>           |

<sup>1</sup> Including 56 singleton HPs, with average length of 63.11 amino acids.

<sup>2</sup> Length in amino acids of predicted ORF.
