# Supplementary material for: Rickettsia Phylogenomics: Unwinding the Intricacies of Obligate Intracellular Life
Source: PubMed Central journal article supplement (PMC2635572; doi:10.1371/journal.pone.0002018), 2008-04-16
Supplement: pone.0002018.s012.pdf [file pone.0002018.s012.pdf]

**Table S9. Singletons present in the *R. typhi* str. Wilmington genome.**

| <b>RIOG</b> | <b>Annotation (56)<sup>1</sup></b>          | <b>Size<sup>2</sup></b> |
|-------------|---------------------------------------------|-------------------------|
| 2639        | CYTOCHROME C OXIDASE POLYPEPTIDE III (coxC) | 38                      |
| 3068        | Hypothetical protein, conserved             | 42                      |
| 2319        | Ribonuclease PH                             | 51                      |
| 2615        | SURFEIT LOCUS PROTEIN 1 (surf1)             | 58                      |
|             | <b>Avg.</b>                                 | <b>47.25</b>            |

<sup>1</sup> Including 52 singleton HPs, with average length of 42 amino acids, and one false singleton HP.

<sup>2</sup> Length in amino acids of predicted singleton ORFs; lengths of false singletons not applicable.
