# Supplementary material for: Rickettsia Phylogenomics: Unwinding the Intricacies of Obligate Intracellular Life
Source: PubMed Central journal article supplement (PMC2635572; doi:10.1371/journal.pone.0002018), 2008-04-16
Supplement: pone.0002018.s014.pdf [file pone.0002018.s014.pdf]

**Table S11. Singletons and false singletons present only in the *R. felis* genome.**

| <b>RiOG<sup>1</sup></b> | <b>Annotation (312)<sup>2</sup></b>                                                | <b>Size<sup>3</sup></b> |
|-------------------------|------------------------------------------------------------------------------------|-------------------------|
| 3322                    | Alanyl-tRNA synthetase                                                             | 235                     |
| 2601                    | Alpha-latrotoxin precursor                                                         | 406                     |
| 2406                    | ATP-dependent protease La                                                          | 815                     |
| 2831                    | ATP-dependent RNA helicase drs1                                                    | 78                      |
| 3536                    | biotin synthase                                                                    | 309                     |
| 2230                    | Caspase recruitment domain-containing protein 15                                   | 234                     |
| 2718                    | Cephalosporin hydroxylase                                                          | 40                      |
| 3238                    | Chaperone clpB                                                                     | 118                     |
| 2291                    | COG0419: ATPase involved in DNA repair                                             | 54                      |
| <u>1057</u>             | COG0847: DNA polymerase III, epsilon subunit and related 3'-5' exonucleases        | NA                      |
| <u>1601</u>             | Type I restriction-modification system methyltransferase subunit                   | NA                      |
| 3173                    | COG0477: Permeases of the major facilitator superfamily                            | 45                      |
| 3258                    | COG0493: NADPH-dependent glutamate synthase beta chain and related oxidoreductases | 38                      |
| 2721                    | COG0605: Superoxide dismutase                                                      | 43                      |
| 2604                    | COG1752: Predicted esterase of the alpha-beta hydrolase superfamily                | 37                      |
| 3161                    | D-beta-hydroxybutyrate dehydrogenase                                               | 46                      |
| 2829                    | Dehydrogenase/reductase SDR family member 4                                        | 84                      |
| 2643                    | Dimethyladenosine transferase                                                      | 36                      |
| 2202                    | Excinuclease ABC subunit C                                                         | 100                     |
| 2773                    | short chain dehydrogenase                                                          | 124                     |
| 3472                    | Thermostable carboxypeptidase 1                                                    | 181                     |
| <u>1596</u>             | Cell division cycle protein 27 homolog                                             | NA                      |
| 2952                    | Fic family protein                                                                 | 83                      |
| 3387                    | Fic family protein                                                                 | 127                     |
| 3478                    | Fic family protein                                                                 | 56                      |
| 3216                    | gp84                                                                               | 92                      |
| 2531                    | GTP pyrophosphokinase                                                              | 140                     |
| 2842                    | GTP pyrophosphokinase                                                              | 172                     |
| 3061                    | GTP pyrophosphokinase                                                              | 204                     |
| 2476                    | Putative GTP pyrophosphokinase                                                     | 238                     |
| <u>1595</u>             | thymidylate kinase                                                                 | NA                      |
| 3503                    | Leucine-rich repeats (LRRs), ribonuclease inhibitor (RI)-like subfamily protein    | 102                     |
| 2100                    | metallophosphoesterase                                                             | 253                     |
| 3076                    | Mg chelatase-related protein                                                       | 46                      |
| 2894                    | Penicillin acylase precursor                                                       | 377                     |
| 2970                    | Citrate-proton symporter                                                           | 425                     |
| 2401                    | ABC transporter ATP-binding protein                                                | 274                     |
| 2680                    | High-affinity choline transporter 1                                                | 984                     |
| 2967                    | MFS-type transporter                                                               | 397                     |
| 2492                    | PROLINE/BETAIN TRANSPORTER (proP2)                                                 | 79                      |
| 2394                    | Proline/betaine transporter                                                        | 307                     |
| 3284                    | Proline/betaine transporter                                                        | 276                     |
| 2106                    | 101 kDa malaria antigen                                                            | 352                     |
| 3050                    | Chitinase A precursor                                                              | 442                     |
| <u>1587</u>             | Patatin T5 precursor                                                               | NA                      |
| 3082                    | Ankyrin repeat domain-containing protein 28                                        | 305                     |
| <u>1597</u>             | Ankyrin repeat protein                                                             | NA                      |
| 3352                    | Ankyrin-2                                                                          | 124                     |

|             |                                                                                          |      |
|-------------|------------------------------------------------------------------------------------------|------|
| <u>1586</u> | Ankyrin-2                                                                                | NA   |
| 2930        | Chain A, Crystal Structure Of E3_19 An Designed Ankyrin Repeat Protein , protein related | 181  |
| 2928        | PREDICTED: similar to ankyrin 2,3/unc44                                                  | 1179 |
| 2168        | Outer membrane protein A precursor                                                       | 103  |
| 2524        | Outer membrane protein A precursor                                                       | 333  |
| 3051        | Outer membrane protein A precursor                                                       | 476  |
| 3124        | Outer membrane protein A precursor                                                       | 105  |
| 3516        | Outer membrane protein A precursor                                                       | 28   |
| 3370        | cell surface antigen Sca12                                                               | 46   |
| 3457        | cell surface antigen Sca12                                                               | 77   |
| 3490        | cell surface antigen Sca12                                                               | 179  |
| <u>1594</u> | Spore protein SP21                                                                       | NA   |
| <u>1280</u> | Spore protein SP21                                                                       | NA   |
| <u>1579</u> | COG3706: Response regulator containing a CheY-like receiver domain and a GGDEF domain    | NA   |
| 2545        | COG2944: Predicted transcriptional regulator                                             | 43   |
| <u>1283</u> | COG1396: Predicted transcriptional regulators                                            | NA   |
| 3048        | addiction module toxin, Txe/YoeB family                                                  | 86   |
| 2342        | Cytotoxic translational repressor of toxin-antitoxin (TA) system RelE                    | 92   |
| <u>1560</u> | Addiction module toxin, RelE/StbE                                                        | NA   |
| <u>1610</u> | ParA family protein                                                                      | NA   |
| 2400        | ParB-like partition proteins                                                             | 252  |
| 2670        | Plasmid stabilization system                                                             | 90   |
| 2359        | stability protein                                                                        | 211  |
| <u>1606</u> | TraA                                                                                     | NA   |
| <u>1588</u> | Conjugative transfer protein TraG                                                        | NA   |
| 2402        | Rickettsial palindromic element (RPE) domain                                             | 54   |
| 2902        | Rickettsial palindromic element (RPE) domain                                             | 52   |
| 2908        | Rickettsial palindromic element (RPE) domain                                             | 41   |
| 3268        | Rickettsial palindromic element (RPE) domain                                             | 39   |
| 3097        | TPR repeat                                                                               | 213  |
| 3538        | Transposable element Tc1 transposase                                                     | 155  |
| <u>993</u>  | Insertion sequence IS5376 putative ATP-binding protein                                   | NA   |
| <u>1281</u> | putative transposase                                                                     | NA   |
| <u>994</u>  | Putative transposase for insertion sequence element IS5376                               | NA   |
| <u>1578</u> | transposase                                                                              | NA   |
| <u>928</u>  | Probable transposase for transposon Tn903                                                | NA   |
| 3146        | Probable transposase for insertion sequence element                                      | 53   |
| <u>1602</u> | ISBma2, transposase                                                                      | NA   |
| <u>1585</u> | Transposase for insertion sequence element IS1328                                        | NA   |
| <u>1591</u> | Transposase for insertion sequence element IS1328                                        | NA   |
| <u>995</u>  | Transposase for insertion sequence element IS21                                          | NA   |
| <u>1282</u> | Transposon Tn917 resolvase                                                               | NA   |
| 2428        | Trichohyalin                                                                             | 216  |
| 2630        | Uncharacterized phage-associated protein                                                 | 213  |
| 2096        | Conserved hypothetical protein                                                           | 219  |
| 2226        | conserved hypothetical protein                                                           | 131  |
| 2281        | Conserved hypothetical protein                                                           | 147  |
| 2427        | Conserved hypothetical protein                                                           | 247  |
| 2473        | Conserved hypothetical protein                                                           | 138  |
| 2515        | Conserved hypothetical protein                                                           | 139  |
| 2537        | Conserved hypothetical protein                                                           | 157  |
| 2584        | Conserved hypothetical protein                                                           | 282  |
| 2600        | Conserved hypothetical protein                                                           | 310  |
| 2638        | Conserved hypothetical protein                                                           | 234  |

|             |                                     |               |
|-------------|-------------------------------------|---------------|
| 2682        | Conserved hypothetical protein      | 107           |
| 3091        | Conserved hypothetical protein      | 273           |
| 3147        | Conserved hypothetical protein      | 94            |
| 3210        | Conserved hypothetical protein      | 94            |
| 3234        | Conserved hypothetical protein      | 437           |
| 3394        | Conserved hypothetical protein      | 195           |
| 3436        | Conserved hypothetical protein      | 169           |
| 3544        | Conserved hypothetical protein      | 136           |
| <u>1581</u> | conserved hypothetical protein      | NA            |
| <u>1583</u> | Conserved hypothetical protein      | NA            |
| <u>1589</u> | Conserved hypothetical protein      | NA            |
| <u>1603</u> | Conserved hypothetical protein      | NA            |
| 2248        | Hypothetical protein, conserved     | 48            |
| 2399        | Hypothetical protein, conserved     | 179           |
| 2540        | Hypothetical protein, conserved     | 254           |
| 2549        | Hypothetical protein, conserved     | 32            |
| 3403        | Hypothetical protein, conserved     | 349           |
| 3439        | Hypothetical protein, conserved     | 35            |
| 3345        | protein of unknown function DUF1016 | 175           |
| 2873        | predicted protein                   | 146           |
| 3520        | Orf12                               | 82            |
|             | <b>Avg.</b>                         | <b>193.66</b> |

<sup>1</sup> Underscored RiOGs depict non-representative OGs.

<sup>2</sup> Including 218 singleton HPs, with average length of 68.20 amino acids, and 25 false singleton HPs.

<sup>3</sup> Length in amino acids of predicted singleton ORFs; lengths of false singletons not applicable.
