# Supplementary material for: Rickettsia Phylogenomics: Unwinding the Intricacies of Obligate Intracellular Life
Source: PubMed Central journal article supplement (PMC2635572; doi:10.1371/journal.pone.0002018), 2008-04-16
Supplement: pone.0002018.s015.pdf [file pone.0002018.s015.pdf]

**Table S12. Singletons present in the *R. rickettsii* str. Sheila Smith CWPP genome.**

| <b>RiOG</b> | <b>Annotation (153)<sup>1</sup></b>                                 | <b>Size<sup>2</sup></b> |
|-------------|---------------------------------------------------------------------|-------------------------|
| 2252        | 30S ribosomal protein S1                                            | 149                     |
| 2288        | AAA+ superfamily protein                                            | 64                      |
| 2898        | ABC-type multidrug transport system, ATPase and permease components | 76                      |
| 2709        | Acetoacetyl-CoA reductase                                           | 53                      |
| 2236        | Ankyrin repeat                                                      | 31                      |
| 2668        | Ankyrin repeat                                                      | 49                      |
| 3057        | Ankyrin repeat                                                      | 88                      |
| 2128        | Conserved hypothetical protein                                      | 105                     |
| 3420        | Conserved hypothetical protein                                      | 85                      |
| 3380        | Dihydrofolate reductase FoaA                                        | 45                      |
| 2681        | Hypothetical protein, conserved                                     | 66                      |
| 3334        | Hypothetical protein, conserved                                     | 39                      |
| 2426        | methylated-DNA-[protein]-cysteine S-methyltransferase               | 52                      |
| 3393        | MFS type sugar transporter                                          | 58                      |
| 2251        | plasmid maintenance system antidote protein                         | 46                      |
| 3200        | Poly-beta-hydroxyalkanoate depolymerase                             | 36                      |
| 3304        | Prophage antirepressor                                              | 46                      |
| 3088        | Pyrrroquinoline quinone (Coenzyme PQQ) biosynthesis protein C       | 37                      |
| 3299        | Rickettsial palindromic element (RPE) domain                        | 50                      |
| 2395        | S-adenosylmethionine synthetase                                     | 64                      |
| 3125        | similarity to methylated-DNA--protein-cysteine methyltransferase    | 41                      |
| 3326        | sodium/pantothenate symporter                                       | 67                      |
| 2612        | Superfamily I DNA and RNA helicase                                  | 97                      |
| 2921        | Vegetative cell wall protein gp1 precursor                          | 63                      |
|             | <b>Avg.</b>                                                         | <b>62.79</b>            |

<sup>1</sup> Including 129 singleton HPs, with average length of 52.02 amino acids.

<sup>2</sup> Length in amino acids of predicted ORF.
