# Supplementary material for: Rickettsia Phylogenomics: Unwinding the Intricacies of Obligate Intracellular Life
Source: PubMed Central journal article supplement (PMC2635572; doi:10.1371/journal.pone.0002018), 2008-04-16
Supplement: pone.0002018.s016.pdf [file pone.0002018.s016.pdf]

**Table S13. Singletons present in the *R. conorii* str. Malish 7 genome.**

| <b>RiOG</b> | <b>Annotation (97)<sup>1</sup></b>                                  | <b>Size<sup>2</sup></b> |
|-------------|---------------------------------------------------------------------|-------------------------|
| 2768        | 3-hydroxyacyl-CoA dehydrogenase FadB                                | 70                      |
| 3139        | AAA+ superfamily protein                                            | 58                      |
| 2797        | ABC-type multidrug transport system, ATPase and permease components | 90                      |
| 3223        | Acetate kinase                                                      | 83                      |
| 2984        | Ankyrin repeat                                                      | 87                      |
| 2675        | COG0419: ATPase involved in DNA repair                              | 82                      |
| 2310        | COG0457: FOG: TPR repeat                                            | 40                      |
| 3241        | COG1835: Predicted acyltransferases                                 | 97                      |
| 2553        | COG3243: Poly(3-hydroxyalkanoate) synthetase                        | 87                      |
| 2284        | COG5430: Uncharacterized secreted protein                           | 63                      |
| 2511        | Hypothetical protein, conserved                                     | 40                      |
| 3488        | Hypothetical protein, conserved                                     | 40                      |
| 2429        | Mg chelatase-related protein                                        | 67                      |
| 3083        | Proline/betaine transporter                                         | 77                      |
| 2813        | Prolyl endopeptidase precursor                                      | 53                      |
| 2383        | Putative multidrug resistance protein 22                            | 131                     |
| 3199        | Rickettsial palindromic element (RPE) domain                        | 36                      |
| 3496        | RND efflux system, outer membrane protein                           | 59                      |
| 2833        | Tellurite resistance protein-related protein                        | 46                      |
| 2589        | Type I restriction-modification system methyltransferase subunit    | 58                      |
|             | <b>Avg.</b>                                                         | <b>68.2</b>             |

<sup>1</sup> Including 77 singleton HPs, with average length of 53.84 amino acids.

<sup>2</sup> Length in amino acids of predicted ORF.
