# Supplementary material for: Rickettsia Phylogenomics: Unwinding the Intricacies of Obligate Intracellular Life
Source: PubMed Central journal article supplement (PMC2635572; doi:10.1371/journal.pone.0002018), 2008-04-16
Supplement: pone.0002018.s017.pdf [file pone.0002018.s017.pdf]

**Table S14. Singletons present in the *R. sibirica* str. 246 genome.**

| <b>RiOG</b> | <b>Annotation (114)<sup>1</sup></b>                              | <b>Size<sup>2</sup></b> |
|-------------|------------------------------------------------------------------|-------------------------|
| 2241        | Acetyltransferase                                                | 26                      |
| 2487        | COG0666: FOG: Ankyrin repeat                                     | 75                      |
| 2440        | COG1835: Predicted acyltransferases                              | 82                      |
| 2772        | ComEC/Rec2-related protein                                       | 43                      |
| 3486        | Competence protein F                                             | 38                      |
| 2279        | Glycosyltransferase                                              | 34                      |
| 2365        | Heme exporter protein A                                          | 34                      |
| 2776        | Lipid A export ATP-binding/permease protein msbA                 | 65                      |
| 2261        | Os02g0189700                                                     | 79                      |
| 2181        | Periplasmic divalent cation tolerance protein                    | 43                      |
| 2285        | Probable tRNA-dihydrouridine synthase                            | 82                      |
| 3126        | Proline/betaine transporter                                      | 41                      |
| 3134        | Rickettsial palindromic element (RPE) domain                     | 48                      |
| 3437        | S-adenosylmethionine synthetase                                  | 69                      |
| 2419        | similarity to cell surface antigen                               | 113                     |
| 2243        | similarity to methylated-DNA--protein-cysteine methyltransferase | 46                      |
| 2305        | similarity to type I restriction enzyme restriction subunit      | 45                      |
| 2918        | Vegetative cell wall protein gp1 precursor                       | 59                      |
| 2137        | Hypothetical protein, conserved                                  | 58                      |
| 2780        | Hypothetical protein, conserved                                  | 36                      |
| 3534        | Hypothetical protein, conserved                                  | 74                      |
|             | <b>Avg.</b>                                                      | <b>56.67</b>            |

<sup>1</sup> Including 93 singleton HPs, with average length of 45.06 amino acids, and one false singleton.

<sup>2</sup> Length in amino acids of predicted singleton ORFs; lengths of false singletons not applicable.
