# Supplementary material for: Rickettsia Phylogenomics: Unwinding the Intricacies of Obligate Intracellular Life
Source: PubMed Central journal article supplement (PMC2635572; doi:10.1371/journal.pone.0002018), 2008-04-16
Supplement: pone.0002018.s018.pdf [file pone.0002018.s018.pdf]

**Table S15. Sequences retrieved from GenBank for *R. helvetica* and *R. australis* used in the phylogenetic analyses shown in Figure 9 and Figure S13.**

| <b>Gene</b>                                    | <b>RiOG</b> | <b><i>R. helvetica</i></b> | <b><i>R. australis</i></b> |
|------------------------------------------------|-------------|----------------------------|----------------------------|
| citrate synthase                               | 175         | Q59741                     | P51039                     |
| co-chaperonin GroES                            | 335         | ABD93985                   | NA                         |
| chaperonin GroEL                               | 336         | ABD93984                   | NA                         |
| VirB4 protein precursor                        | 225         | ABG74480                   | ABG74462                   |
| recombinase A                                  | 245         | ABG74458                   | ABG74444                   |
| molecular chaperone DnaK                       | 667         | ABG74418                   | ABG74428                   |
| Chromosomal replication initiator protein DnaA | 356         | ABG74394                   | ABG74398                   |
| ATP synthase alpha subunit                     | 208         | AAM93518                   | ABG74366                   |
| 190 KD antigen precursor (sca1)                | 797         | AAU06440                   | AAU06437                   |
| DNA polymerase III subunit alpha               | 230         | CAB56077                   | NA                         |
| DNA polymerase I                               | 231         | Q9RLB6                     | NA                         |
| Cell division protein FTSY                     | 232         | CAB56072                   | NA                         |
| Cell surface antigen Sca4                      | 432         | AAL23857                   | Q9AJ64                     |
| DNA-directed RNA polymerase beta subunit       | 701         | AAM93506                   | NA                         |
| Elongation factor EF-Tu                        | 305         | Q8KT99                     | NA                         |
| Elongation factor EF-G                         | 708         | Q8KTB4                     | NA                         |
