# Supplementary material for: Rickettsia Phylogenomics: Unwinding the Intricacies of Obligate Intracellular Life
Source: PLoS One. 2008 Apr 16;3(4):e2018. doi: 10.1371/journal.pone.0002018 (PMC2635572; doi:10.1371/journal.pone.0002018)
Supplement: Table S2 — Distribution and characterization of predicted ORFs within 259 non-representative OGs across ten rickettsial genomes, and the results after manual curation. (0.18 MB PDF) [file pone.0002018.s005.pdf]

**Table S2. Seven hundred-fifty two core rickettsial OGs predicted across ten analyzed genomes.**

**A: RNA processing and modification (6; 1%)**

| <b>RiOG<sup>1</sup></b> | <b>Annotation</b>                           |
|-------------------------|---------------------------------------------|
| 300                     | ATP-dependent RNA helicase dbp2             |
| 767                     | glucose-inhibited division protein A        |
| 166                     | Maturase K                                  |
| 204                     | RNA modification enzyme, MiaB family        |
| 304                     | RNA methyltransferase, TrmH family, group 3 |
| 434                     | YihY family protein                         |

**B: Chromatin structure and dynamics (3; <1%)**

| <b>RiOG<sup>1</sup></b> | <b>Annotation</b>           |
|-------------------------|-----------------------------|
| 536                     | Centrosome protein 55       |
| 679                     | DNA-binding protein HU      |
| 414                     | DNA-binding protein HU-like |

**C: Energy production and conversion (67; 9%)**

| <b>RiOG<sup>1</sup></b> | <b>Annotation</b>                                       |
|-------------------------|---------------------------------------------------------|
| 58                      | Acyl-CoA desaturase                                     |
| 212                     | aconitate hydratase 1                                   |
| 793                     | ATP synthase F0, A subunit                              |
| 208                     | ATP synthase F1, alpha subunit                          |
| 210                     | ATP synthase F1, beta subunit                           |
| 209                     | ATP synthase F1, gamma subunit                          |
| 207                     | ATP synthase F1, delta subunit                          |
| 211                     | ATP synthase F1, epsilon subunit                        |
| 792                     | ATP synthase protein I                                  |
| 794                     | ATP synthase protein 9, mitochondrial                   |
| 795                     | ATP synthase B' chain                                   |
| 796                     | ATP synthase B chain, sodium ion specific               |
| 527                     | Citrate-proton symporter                                |
| 175                     | citrate synthase I                                      |
| 600                     | Cytochrome b                                            |
| 217                     | Cytochrome c biogenesis ATP-binding export protein ccmA |
| 365                     | Cytochrome c-type biogenesis protein ccmE               |
| <u>30</u>               | Cytochrome c-type biogenesis protein cycK               |
| 599                     | Cytochrome c1, heme protein, mitochondrial precursor    |
| 613                     | Cytochrome c                                            |
| 662                     | Cytochrome c oxidase subunit 3                          |
| 643                     | Cytochrome d ubiquinol oxidase subunit I                |
| 642                     | cytochrome d ubiquinol oxidase, subunit II              |
| 206                     | dihydrolipoamide dehydrogenase                          |
| 189                     | Ferredoxin-2                                            |
| 655                     | 2Fe-2S ferredoxin                                       |
| 762                     | iron-sulfur cluster assembly accessory protein          |
| 442                     | FeS cluster assembly scaffold IscU                      |
| 443                     | iron-sulfur cluster assembly accessory protein          |
| 303                     | fumarate hydratase, class II                            |
| 364                     | Inorganic pyrophosphatase                               |
| 387                     | 2-polyprenyl-6-methoxyphenol 4-hydroxylase              |

|     |                                                                                  |
|-----|----------------------------------------------------------------------------------|
| 462 | dihydrolipoamide dehydrogenase                                                   |
| 469 | isopentenyl-diphosphate delta-isomerase, type 2                                  |
| 478 | Glycerol-3-phosphate dehydrogenase [NAD(P)+]                                     |
| 133 | NADH dehydrogenase [ubiquinone] 1 alpha subcomplex subunit 12                    |
| 542 | NADH (or F420H2) dehydrogenase, subunit C                                        |
| 543 | NADH dehydrogenase I, D subunit                                                  |
| 541 | NADH-quinone oxidoreductase chain A                                              |
| 117 | NADH-quinone oxidoreductase, B subunit                                           |
| 544 | NADH-quinone oxidoreductase, E subunit                                           |
| 593 | NAD(P)H-quinone oxidoreductase chain 5, chloroplast                              |
| 724 | NADH-quinone oxidoreductase, F subunit                                           |
| 214 | NADH-quinone oxidoreductase, chain G                                             |
| 216 | NADH-quinone oxidoreductase, chain I                                             |
| 220 | NADH-quinone oxidoreductase chain J                                              |
| 137 | NADH-quinone oxidoreductase chain K                                              |
| 215 | NADH-ubiquinone oxidoreductase chain 1                                           |
| 75  | proton-translocating NADH-quinone oxidoreductase, chain N                        |
| 218 | proton-translocating NADH-quinone oxidoreductase, chain M                        |
| 108 | NAD(P) transhydrogenase, mitochondrial precursor                                 |
| 751 | NAD(P) transhydrogenase, mitochondrial precursor                                 |
| 161 | NAD(P) transhydrogenase subunit alpha                                            |
| 528 | phosphate acetyltransferase                                                      |
| 44  | Phosphate acetyltransferase                                                      |
| 609 | Pyruvate dehydrogenase E1 component subunit alpha, mitochondrial precursor       |
| 608 | Pyruvate dehydrogenase E1 component subunit beta, mitochondrial precursor        |
| 409 | pyruvate dehydrogenase complex dihydrolipoamide acetyltransferase                |
| 671 | 2-oxoglutarate dehydrogenase, E1 component                                       |
| 672 | 2-oxoglutarate dehydrogenase, E2 component, dihydrolipoamide succinyltransferase |
| 712 | succinate dehydrogenase, flavoprotein subunit                                    |
| 713 | succinate dehydrogenase, hydrophobic membrane anchor protein                     |
| 714 | succinate dehydrogenase, cytochrome b556 subunit                                 |
| 777 | succinate dehydrogenase and fumarate reductase iron-sulfur protein               |
| 487 | succinyl-CoA synthetase, alpha subunit                                           |
| 486 | succinyl-CoA synthetase, beta subunit                                            |
| 763 | 3-deoxy-8-phosphooctulonate synthase                                             |
| 601 | ubiquinol-cytochrome c reductase, iron-sulfur subunit                            |
| 338 | ubiquinone biosynthesis O-methyltransferase                                      |
| 291 | ubiquinone/menaquinone biosynthesis methyltransferases                           |

**cf: Combined functions (22; 3%)**

| <b>RiOG<sup>1</sup></b> | <b>Annotation</b>                                                                                             |
|-------------------------|---------------------------------------------------------------------------------------------------------------|
| 347                     | ribonuclease P protein component; ( <b>A</b> and <b>J</b> )                                                   |
| 198                     | tyrosine recombinase XerC; ( <b>B</b> and <b>D</b> )                                                          |
| 538                     | tyrosine recombinase XerD; ( <b>B</b> and <b>D</b> )                                                          |
| 605                     | isocitrate dehydrogenase; ( <b>C</b> and <b>E</b> )                                                           |
| 526                     | malate dehydrogenase, NAD-dependent; ( <b>C</b> and <b>E</b> )                                                |
| 219                     | proton-translocating NADH-quinone oxidoreductase, chain L; ( <b>C</b> and <b>P</b> )                          |
| 489                     | dihydrodipicolinate synthase; ( <b>E</b> and <b>M</b> )                                                       |
| 379                     | COG0591: Na <sup>+</sup> /proline symporter; ( <b>E</b> and <b>R</b> )                                        |
| 803                     | COG0493: NADPH-dependent glutamate synthase beta chain and related oxidoreductases; ( <b>E</b> and <b>R</b> ) |
| 694                     | Amino-acid-binding protein aabA precursor; ( <b>E</b> and <b>T</b> )                                          |
| 523                     | 3-deoxy-D-manno-octulosonate cytidyltransferase; ( <b>G</b> and <b>M</b> )                                    |
| 292                     | 2-polyprenylphenol 6-hydroxylase; ( <b>H</b> and <b>C</b> )                                                   |
| 243                     | acyl carrier protein; ( <b>I</b> and <b>Q</b> )                                                               |

|     |                                                                                     |
|-----|-------------------------------------------------------------------------------------|
| 359 | transcription-repair coupling factor; ( <b>L</b> and <b>K</b> )                     |
| 88  | Phosphatidate cytidyltransferase; ( <b>M</b> and <b>I</b> )                         |
| 91  | COG0526: Thiol-disulfide isomerase and thioredoxins; ( <b>O</b> and <b>C</b> )      |
| 475 | thioredoxin-disulfide reductase; ( <b>O</b> and <b>C</b> )                          |
| 412 | COG0500: SAM-dependent methyltransferases; ( <b>Q</b> and <b>R</b> )                |
| 742 | COG0500: SAM-dependent methyltransferases; ( <b>Q</b> and <b>R</b> )                |
| 283 | ATP-dependent Clp protease, ATP-binding subunit ClpX; ( <b>U</b> and <b>O</b> )     |
| 583 | Guanosine-5'-triphosphate,3'-diphosphate pyrophosphatase; ( <b>T</b> and <b>K</b> ) |
| 202 | BolA protein homolog; ( <b>V</b> and <b>D</b> )                                     |

#### **D: Cell cycle control, mitosis and meiosis (11; 2%)**

| <b>RiOG<sup>1</sup></b> | <b>Annotation</b>                   |
|-------------------------|-------------------------------------|
| 614                     | cell division protein FtsA          |
| 194                     | DNA translocase ftsK                |
| 382                     | Cell division protein FtsL          |
| 110                     | Cell division protein ftsQ homolog  |
| 76                      | cell division protein FtsW          |
| 302                     | cell division protein FtsZ          |
| 698                     | Chromosome partitioning protein     |
| 766                     | ParB-like partition proteins        |
| 516                     | intracellular septation protein A   |
| 200                     | septum formation protein Maf        |
| 493                     | COG2919: Septum formation initiator |

#### **E: Amino acid transport and metabolism (19; 3%)**

| <b>RiOG<sup>1</sup></b> | <b>Annotation</b>                                                                       |
|-------------------------|-----------------------------------------------------------------------------------------|
| 573                     | amino acid transporter                                                                  |
| 675                     | Excitatory amino acid transporter 2                                                     |
| 711                     | amino acid ABC transporter, permease protein, 3-TM region, His/Glu/Gln/Arg/opine family |
| 743                     | Aspartate aminotransferase                                                              |
| 251                     | aspartate kinase                                                                        |
| 567                     | aspartate-semialdehyde dehydrogenase                                                    |
| 441                     | cysteine desulfurase IscS                                                               |
| 181                     | DAP2-like protein                                                                       |
| 84                      | diaminopimelate epimerase                                                               |
| 695                     | dihydrodipicolinate reductase                                                           |
| 435                     | Glutamine synthetase                                                                    |
| 157                     | Glutamine transport ATP-binding protein glnQ                                            |
| 248                     | NAD-specific glutamate dehydrogenase                                                    |
| 127                     | Nitrogen assimilation regulatory protein ntrX                                           |
| 444                     | putrescine-ornithine antiporter                                                         |
| 261                     | Serine hydroxymethyltransferase 2                                                       |
| 152                     | succinyl-diaminopimelate desuccinylase                                                  |
| 659                     | 2,3,4,5-tetrahydropyridine-2,6-dicarboxylate N-succinyltransferase                      |
| 471                     | Threonine dehydratase biosynthetic                                                      |

#### **F: Nucleotide transport and metabolism (17; 2%)**

| <b>RiOG<sup>1</sup></b> | <b>Annotation</b>              |
|-------------------------|--------------------------------|
| 325                     | adenylate kinases              |
| 431                     | ADP/ATP carrier protein family |
| 448                     | ADP/ATP carrier protein family |
| 525                     | ADP/ATP carrier protein family |

|     |                                                          |
|-----|----------------------------------------------------------|
| 264 | ADP/ATP carrier protein family                           |
| 770 | ADP/ATP carrier protein family                           |
| 524 | CTP synthase                                             |
| 415 | cytidylate kinase                                        |
| 187 | cytosine deaminase                                       |
| 756 | deoxycytidine triphosphate deaminase                     |
| 241 | Guanylate kinase                                         |
| 768 | Nucleoside diphosphate kinase                            |
| 639 | Phosphoribosylaminoimidazole-succinocarboxamide synthase |
| 120 | thymidylate kinase                                       |
| 578 | thymidylate synthase, flavin-dependent                   |
| 510 | dUTP diphosphatase                                       |
| 689 | uridylate kinase                                         |

### **G: Carbohydrate transport and metabolism (15; 2%)**

| <b>RiOG<sup>1</sup></b> | <b>Annotation</b>                                              |
|-------------------------|----------------------------------------------------------------|
| 276                     | Beta-hexosaminidase A precursor                                |
| 551                     | Capsular polysaccharide biosynthesis glycosyl transferase capM |
| 555                     | Capsular polysaccharide biosynthesis protein capD              |
| 556                     | dTDP-4-dehydrorhamnose reductase                               |
| 369                     | HAD-superfamily subfamily IIA hydrolase, TIGR01459             |
| 623                     | Inositol-1-monophosphatase                                     |
| 424                     | Phosphomannomutase                                             |
| <u>33</u>               | Proline/betaine transporter                                    |
| 147                     | Proline/betaine transporter                                    |
| 249                     | Proline/betaine transporter                                    |
| 287                     | proline/betaine transporter                                    |
| 749                     | Proline/betaine transporter                                    |
| 437                     | pyruvate, phosphate dikinase                                   |
| 427                     | sugar isomerase, KpsF/GutQ family                              |
| 769                     | Sugar phosphate permease                                       |
| 579                     | sugar-phosphate isomerases, RpiB/LacA/LacB family              |

### **H: Coenzyme transport and metabolism (19; 3%)**

| <b>RiOG<sup>1</sup></b> | <b>Annotation</b>                                                  |
|-------------------------|--------------------------------------------------------------------|
| 178                     | 5-aminolevulinic acid synthase                                     |
| 402                     | Delta-aminolevulinic acid dehydratase                              |
| 406                     | biotin--acetyl-CoA-carboxylase ligase                              |
| 463                     | biotin synthesis protein BioC                                      |
| 113                     | Coproporphyrinogen III oxidase, mitochondrial precursor            |
| 143                     | dephospho-CoA kinase                                               |
| 145                     | ferrochelataase                                                    |
| 404                     | FolC bifunctional protein                                          |
| 419                     | FolD bifunctional protein                                          |
| 85                      | GTP cyclohydrolase I                                               |
| 151                     | lipoate-protein ligase B                                           |
| 142                     | lipoic acid synthetase                                             |
| 446                     | Octaprenyl-diphosphate synthase                                    |
| 286                     | 4-hydroxybenzoate polyprenyl transferase                           |
| 400                     | polyprenyl P-hydroxybenzoate and phenylacrylic acid decarboxylases |
| 457                     | porphobilinogen deaminase                                          |
| 673                     | COG0720: 6-pyruvoyl-tetrahydropterin synthase                      |
| 663                     | Ubiquinone biosynthesis protein COQ7 homolog                       |
| 116                     | uroporphyrinogen decarboxylase                                     |

**I: Lipid transport and metabolism (16; 2%)**

| <b>RiOG<sup>1</sup></b> | <b>Annotation</b>                                                       |
|-------------------------|-------------------------------------------------------------------------|
| 3455                    | 1-acyl-sn-glycerol-3-phosphate acyltransferase 1, chloroplast precursor |
| 40                      | acylglycerophosphoethanolamine acyltransferase                          |
| 801                     | beta-hydroxyacyl-(acyl-carrier-protein) dehydratase FabZ                |
| 773                     | CDP-diacylglycerol--glycerol-3-phosphate 3-phosphatidyltransferase      |
| 620                     | CDP-diacylglycerol--serine O-phosphatidyltransferase                    |
| 78                      | Dolichol kinase                                                         |
| 535                     | Enoyl-[acyl-carrier-protein] reductase [NADH]                           |
| 519                     | Lipid A export ATP-binding/permease protein msbA                        |
| 265                     | malonyl CoA-acyl carrier protein transacylase                           |
| 155                     | COG0671: Membrane-associated phospholipid phosphatase                   |
| 254                     | Phosphatidylglycerophosphatase A                                        |
| 373                     | phosphopantetheine--protein transferase domain                          |
| 621                     | phosphatidylserine decarboxylase homolog                                |
| 290                     | polyhydroxyalkanoate depolymerase, intracellular                        |
| 341                     | Propionyl-CoA carboxylase beta chain, mitochondrial precursor           |
| 342                     | Propionyl-CoA carboxylase alpha chain, mitochondrial precursor          |

**J: Translation**

| <b>RiOG<sup>1</sup></b> | <b>Annotation (118; 16%)</b>                                                   |
|-------------------------|--------------------------------------------------------------------------------|
| 119                     | Sua5/YciO/YrdC/YwIC family protein                                             |
| 173                     | pseudouridine synthase, RluA family                                            |
| 193                     | methionine aminopeptidase, type I                                              |
| 233                     | Small protein A homolog precursor                                              |
| 460                     | Ribonuclease D                                                                 |
| 494                     | COG0349: Ribonuclease D                                                        |
| 334                     | ribonuclease PH                                                                |
| 344                     | rpsU-divergently transcribed protein                                           |
| 353                     | peptidyl-tRNA hydrolase                                                        |
| 410                     | peptide chain release factor 1                                                 |
| 597                     | peptide chain release factor 2                                                 |
| 134                     | peptide deformylase                                                            |
| 418                     | ribosomal subunit interface protein                                            |
| 447                     | Mitochondrial ribosomal protein VAR1                                           |
| 92                      | SsrA-binding protein                                                           |
| 484                     | ribosome-binding factor A                                                      |
| 548                     | 16S rRNA processing protein RimM                                               |
| 690                     | ribosome recycling factor                                                      |
| 692                     | glutamyl-tRNA(Gln) and/or aspartyl-tRNA(Asn) amidotransferase, A subunit       |
| 693                     | glutamyl-tRNA(Gln) and/or aspartyl-tRNA(Asn) amidotransferase, B subunit       |
| 691                     | glutamyl-tRNA(Gln) and/or aspartyl-tRNA(Asn) amidotransferase, C subunit       |
| 757                     | COG0154: Asp-tRNAAsn/Glu-tRNA Gln amidotransferase A subunit, related amidases |
| 428                     | Polyribonucleotide nucleotidyltransferase                                      |
| 172                     | methyltransferase, HemK family                                                 |
| 684                     | Ribosomal RNA large subunit methyltransferase J                                |
| 646                     | S-adenosylmethionine:tRNA ribosyltransferase-isomerase                         |
| 298                     | dimethyladenosine transferase                                                  |
| 273                     | queuine tRNA-ribosyltransferase                                                |
| 498                     | MiaB-like tRNA modifying enzyme                                                |
| 416                     | ribosomal protein S1                                                           |
| 746                     | ribosomal protein S2                                                           |
| 312                     | ribosomal protein S3                                                           |

|           |                                 |
|-----------|---------------------------------|
| 550       | ribosomal protein S4            |
| 321       | ribosomal protein S5            |
| 782       | ribosomal protein S6            |
| 709       | ribosomal protein S7            |
| 318       | 30S ribosomal protein S8        |
| 627       | 30S ribosomal protein S9        |
| 306       | ribosomal protein S10           |
| 327       | 30S ribosomal protein S11       |
| 710       | ribosomal protein S12           |
| 326       | 30S ribosomal protein S13       |
| 317       | 30S ribosomal protein S14       |
| 429       | ribosomal protein S15           |
| 150       | ribosomal protein S16           |
| 314       | 30S ribosomal protein S17       |
| 781       | ribosomal protein S18           |
| 310       | ribosomal protein S19           |
| 330       | ribosomal protein S20           |
| 345       | ribosomal protein S21           |
| 704       | ribosomal protein L1            |
| 309       | ribosomal protein L2            |
| 307       | 50S ribosomal protein L3        |
| 308       | 50S ribosomal protein L4        |
| 316       | 50S ribosomal protein L5        |
| 319       | 50S ribosomal protein L6        |
| 702       | ribosomal protein L7/L12        |
| 780       | ribosomal protein L9            |
| 703       | 50S ribosomal protein L10       |
| 705       | ribosomal protein L11           |
| 628       | ribosomal protein L13           |
| 315       | ribosomal protein L14           |
| 323       | ribosomal protein L15           |
| 313       | ribosomal protein L16           |
| 329       | ribosomal protein L17           |
| 320       | ribosomal protein L18           |
| 727       | ribosomal protein L19           |
| 349       | ribosomal protein L20           |
| 253       | ribosomal protein L21           |
| 311       | ribosomal protein L22           |
| 139       | 50S ribosomal protein L23       |
| 352       | ribosomal protein L25, Ctc-form |
| 252       | ribosomal protein L27           |
| 735       | ribosomal protein L28           |
| 140       | ribosomal protein L29           |
| 322       | ribosomal protein L30           |
| 97        | 50S ribosomal protein L31       |
| 234       | ribosomal protein L32           |
| 149       | ribosomal protein L33           |
| 348       | ribosomal protein L34           |
| 350       | ribosomal protein L35           |
| 466       | 50S ribosomal protein L36       |
| <u>47</u> | alanyl-tRNA synthetase          |
| 760       | arginyl-tRNA synthetase         |
| 697       | aspartyl-tRNA synthetase        |
| 747       | cysteinyl-tRNA synthetase       |
| 337       | glutamyl-tRNA synthetase        |
| 562       | glutamyl-tRNA synthetase        |

|     |                                                              |
|-----|--------------------------------------------------------------|
| 170 | glycyl-tRNA synthetase, alpha subunit                        |
| 171 | glycyl-tRNA synthetase, beta subunit                         |
| 572 | histidyl-tRNA synthetase                                     |
| 343 | isoleucyl-tRNA synthetase                                    |
| 55  | leucyl-tRNA synthetase                                       |
| 779 | tRNA(Ile)-lysine synthetase                                  |
| 530 | lysyl-tRNA synthetase                                        |
| 288 | methionyl-tRNA synthetase                                    |
| 648 | methionyl-tRNA formyltransferase                             |
| 82  | phenylalanyl-tRNA synthetase, alpha subunit                  |
| 497 | phenylalanyl-tRNA synthetase, beta subunit                   |
| 522 | prolyl-tRNA synthetase                                       |
| 226 | seryl-tRNA synthetase                                        |
| 638 | threonyl-tRNA synthetase                                     |
| 389 | tyrosyl-tRNA synthetase                                      |
| 456 | tryptophanyl-tRNA synthetase                                 |
| 285 | valyl-tRNA synthetase                                        |
| 728 | tRNA (guanine-N1)-methyltransferase                          |
| 798 | tRNA-nucleotidyltransferase 1, mitochondrial precursor       |
| 165 | tRNA pseudouridine synthase A                                |
| 247 | tRNA modification GTPase TrmE                                |
| 423 | tRNA delta(2)-isopentenylpyrophosphate transferase           |
| 430 | tRNA pseudouridine synthase B                                |
| 458 | tRNA-modifying protein ygfZ                                  |
| 574 | tRNA (5-methylaminomethyl-2-thiouridylate)-methyltransferase |
| 708 | translation elongation factor G                              |
| 624 | translation elongation factor P                              |
| 201 | translation initiation factor IF-1                           |
| 393 | translation initiation factor IF-2                           |
| 408 | translation initiation factor IF-3                           |
| 745 | translation elongation factor Ts                             |
| 305 | translation elongation factor Tu                             |

#### **K: Transcription (14; 2%)**

| <b>RiOG<sup>1</sup></b> | <b>Annotation</b>                                     |
|-------------------------|-------------------------------------------------------|
| 299                     | Cold shock-like protein 7.0                           |
| 328                     | DNA-directed RNA polymerase, alpha subunit            |
| 700                     | DNA-directed RNA polymerase, beta" subunit            |
| 701                     | DNA-directed RNA polymerase, beta subunit             |
| 372                     | DNA-directed RNA polymerase, omega subunit            |
| 162                     | transcription elongation factor GreA                  |
| 199                     | RNA polymerase-binding protein DksA                   |
| 164                     | RNA polymerase sigma factor RpoD                      |
| 754                     | Transcriptional regulatory protein pmrA               |
| 706                     | transcription termination/antitermination factor NusG |
| 93                      | transcription antitermination factor NusB             |
| 392                     | transcription termination factor NusA                 |
| 413                     | transcription termination factor Rho                  |
| 576                     | alternative sigma factor RpoH                         |

#### **L: Replication, recombination and repair (52; 7%)**

| <b>RiOG<sup>1</sup></b> | <b>Annotation</b>                                           |
|-------------------------|-------------------------------------------------------------|
| 331                     | Bacterial chromosomal replication initiator protein, family |
| 356                     | chromosomal replication initiator protein DnaA              |

|           |                                                     |
|-----------|-----------------------------------------------------|
| 520       | Holliday junction DNA helicase RuvA                 |
| 89        | Holliday junction DNA helicase RuvB                 |
| 721       | crossover junction endodeoxyribonuclease RuvC       |
| 148       | DNA mismatch repair protein MutL                    |
| 580       | DNA mismatch repair protein MutS                    |
| 231       | DNA polymerase I                                    |
| 230       | DNA polymerase III, alpha subunit                   |
| 496       | DNA polymerase III, beta subunit                    |
| <u>46</u> | DNA polymerase III, subunits gamma and tau          |
| 678       | DNA polymerase III subunit delta                    |
| 664       | COG1466: DNA polymerase III, delta subunit          |
| 268       | DNA polymerase III, epsilon subunit                 |
| 153       | COG2927: DNA polymerase III, chi subunit            |
| 163       | DNA primase                                         |
| 385       | DNA double-strand break repair rad50 ATPase         |
| <u>20</u> | DNA double-strand break repair rad50 ATPase         |
| 396       | DNA repair protein RadA                             |
| 245       | recA protein                                        |
| 789       | DNA replication and repair protein RecF             |
| <u>52</u> | COG1200: RecG-like helicase                         |
| 411       | single-stranded-DNA-specific exonuclease RecJ       |
| 395       | DNA repair protein RecO                             |
| 670       | DNA repair protein RecN                             |
| 472       | COG0419: ATPase involved in DNA repair              |
| 481       | recombination protein RecR                          |
| 284       | DNA recombination protein rmuC homolog              |
| 183       | excinuclease ABC, A subunit                         |
| 652       | excinuclease ABC, B subunit                         |
| 378       | excinuclease ABC, C subunit                         |
| 294       | exodeoxyribonuclease III                            |
| 610       | exodeoxyribonuclease III                            |
| 295       | exodeoxyribonuclease VII, large subunit             |
| 546       | exodeoxyribonuclease VII, small subunit             |
| 258       | endonuclease III                                    |
| 266       | ATP-dependent helicase                              |
| 399       | replicative DNA helicase                            |
| 473       | ATP-dependent DNA helicase PcrA                     |
| 271       | Ribonuclease HI                                     |
| 653       | Ribonuclease HII                                    |
| 95        | ribonuclease III                                    |
| 274       | DNA ligase, NAD-dependent                           |
| 289       | hydrolase, TatD family                              |
| 649       | DNA gyrase, A subunit                               |
| 370       | DNA gyrase, B subunit                               |
| 401       | primosomal protein N"                               |
| 421       | ribonucleoside-diphosphate reductase, alpha subunit |
| 422       | Ribonucleoside-diphosphate reductase small chain B  |
| 545       | DNA-3-methyladenine glycosylase                     |
| 561       | DNA topoisomerase I                                 |
| 758       | DNA topoisomerase IV, A subunit                     |
| 633       | DNA topoisomerase IV, B subunit                     |
| 174       | uracil-DNA glycosylase, family 4                    |
| 182       | single-strand binding protein                       |

**M: Cell wall/membrane biogenesis (63; 9%)**

**RiOG<sup>1</sup>****Annotation**

|     |                                                                    |
|-----|--------------------------------------------------------------------|
| 611 | D-alanyl-D-alanine carboxypeptidase precursor                      |
| 615 | D-alanine--D-alanine ligase                                        |
| 739 | alanine racemase                                                   |
| 81  | HtrB proetin                                                       |
| 103 | Glycosyltransferase                                                |
| 474 | Glycosyltransferase                                                |
| 278 | COG0438: Glycosyltransferase                                       |
| 499 | COG0438: Glycosyltransferase                                       |
| 109 | Membrane protein                                                   |
| 176 | GTP-binding protein Obg/CgtA                                       |
| 722 | GTP-binding protein Era                                            |
| 596 | GTP-binding protein LepA                                           |
| 607 | GTP-binding protein TypA                                           |
| 354 | GTP-binding protein YchF                                           |
| 277 | outer membrane autotransporter barrel domain                       |
| 549 | Outer membrane assembly protein                                    |
| 636 | Outer membrane protein tolC precursor                              |
| 686 | Outer membrane protein assembly factor yaeT precursor              |
| 797 | outer membrane autotransporter barrel domain                       |
| 185 | 17 kDa surface antigen precursor                                   |
| 339 | 29 kDa membrane protein in psaA 5'region                           |
| 191 | Opacity protein, putative                                          |
| 192 | Phospho-N-acetylmuramoyl-pentapeptide-transferase                  |
| 205 | penicillin-binding protein, 1A family                              |
| 383 | Penicillin-binding protein 2                                       |
| 384 | Penicillin-binding protein                                         |
| 518 | penicillin-binding protein dacF precursor                          |
| 236 | peptidoglycan-associated lipoprotein                               |
| 279 | lipoprotein releasing system, transmembrane protein, LolC/E family |
| 517 | rare lipoprotein A                                                 |
| 534 | apolipoprotein N-acyltransferase                                   |
| 100 | prolipoprotein diacylglycerol transferase                          |
| 641 | Lipopolysaccharide core biosynthesis glycosyl transferase kdtX     |
| 540 | COG3307: Lipid A core - O-antigen ligase and related enzymes       |
| 238 | cell shape determining protein, MreB/Mrl family                    |
| 239 | rod shape-determining protein MreC                                 |
| 595 | rod shape-determining protein RodA                                 |
| 242 | 3-oxoacyl-[acyl-carrier-protein] synthase 2                        |
| 235 | 3-oxoacyl-(acyl-carrier-protein) synthase III                      |
| 244 | 3-oxoacyl-(acyl-carrier-protein) reductase                         |
| 275 | tetraacyldisaccharide 4"-kinase                                    |
| 296 | Organic solvent tolerance protein precursor                        |
| 505 | Membrane proteins related to metalloendopeptidases                 |
| 685 | membrane-associated zinc metalloprotease, putative                 |
| 362 | phospho-N-acetylmuramoyl-pentapeptide-transferase                  |
| 371 | UDP-N-acetylglucosamine 1-carboxyvinyltransferase                  |
| 360 | UDP-N-acetylmuramyl-tripeptide synthetases                         |
| 361 | UDP-N-acetylmuramoyl-tripeptide--D-alanyl-D-alanine ligase         |
| 229 | UDP-glucose 6-dehydrogenase                                        |
| 112 | UDP-N-acetylenolpyruvoylglucosamine reductase                      |
| 104 | UDP-N-acetylglucosamine 2-epimerase                                |
| 502 | UDP-N-acetylmuramoylalanine--D-glutamate ligase                    |
| 612 | UDP-3-O-acyl N-acetylglucosamine deacetylase                       |
| 616 | UDP-N-acetylmuramate--alanine ligase                               |

|     |                                                                                                                    |
|-----|--------------------------------------------------------------------------------------------------------------------|
| 800 | UDP-3-O-[3-hydroxymyristoyl] glucosamine N-acyltransferase                                                         |
| 802 | acyl-[acyl-carrier-protein]--UDP-N-acetylglucosamine O-acyltransferase                                             |
| 381 | S-adenosyl-methyltransferase MraW                                                                                  |
| 468 | Bifunctional protein glmU                                                                                          |
| 492 | undecaprenyl diphosphate synthase                                                                                  |
| 501 | undecaprenyldiphospho-muramoylpentapeptide beta-N-acetylglucosaminyltransferase                                    |
| 509 | COG0741: Soluble lytic murein transglycosylase and related regulatory proteins (some contain LysM/invasin domains) |
| 634 | Vegetative cell wall protein gp1 precursor                                                                         |
| 101 | Periplasmic protein TonB                                                                                           |

#### **N: Cell motility (1; <1%)**

| <b>RiOG<sup>1</sup></b> | <b>Annotation</b>                                      |
|-------------------------|--------------------------------------------------------|
| 454                     | COG5622: Protein required for attachment to host cells |

#### **O: Posttranslational modification, protein turnover, chaperones (36; 5%)**

| <b>RiOG<sup>1</sup></b> | <b>Annotation</b>                                           |
|-------------------------|-------------------------------------------------------------|
| 136                     | Fe-S protein assembly co-chaperone HscB                     |
| 335                     | 10 kDa chaperonin 5                                         |
| 106                     | ATP-dependent protease hslV                                 |
| 417                     | ATP-dependent Clp protease, proteolytic subunit ClpP        |
| 784                     | Chaperone clpB                                              |
| 668                     | chaperone protein DnaJ                                      |
| 654                     | Chaperone protein dnaK                                      |
| 667                     | chaperone protein DnaK                                      |
| 336                     | chaperonin GroEL                                            |
| 179                     | Chaperone protein htpG                                      |
| 632                     | carboxyl-terminal protease                                  |
| 470                     | ATP-dependent protease La                                   |
| 559                     | Membrane protease subunit, stomatin/prohibitin-like protein |
| 565                     | heat shock protein HslVU, ATPase subunit HslU               |
| 594                     | Protease 2                                                  |
| 666                     | heat shock protease                                         |
| 716                     | protease Do                                                 |
| 177                     | trigger factor                                              |
| 445                     | Aminopeptidase P                                            |
| 195                     | COG0760: Parvulin-like peptidyl-prolyl isomerase            |
| 560                     | Peroxiredoxin-1                                             |
| 259                     | glutaredoxin homolog                                        |
| 651                     | glutaredoxin 3                                              |
| 438                     | Glutathione S-transferase                                   |
| 297                     | Parvulin-like peptidyl-prolyl isomerase, putative           |
| 531                     | Disulfide bond formation protein DsbB                       |
| 791                     | Protein-disulfide isomerase                                 |
| 488                     | COG1651: Protein-disulfide isomerase                        |
| 513                     | COG1047: FKBP-type peptidyl-prolyl cis-trans isomerases 2   |
| 301                     | HIRA-interacting protein 5                                  |
| 333                     | Protein grpE                                                |
| 351                     | Organic radical activating enzyme                           |
| 374                     | Protein export protein PrsA precursor                       |
| 420                     | Thioredoxin reductase                                       |
| 805                     | thioredoxin                                                 |
| 778                     | ATP-dependent metalloprotease FtsH                          |

**P: Inorganic ion transport and metabolism (14; 2%)**

| <b>RiOG<sup>1</sup></b> | <b>Annotation</b>                                                              |
|-------------------------|--------------------------------------------------------------------------------|
| 144                     | Metal ABC transporter substrate-binding lipoprotein precursor                  |
| 184                     | Ferric cations import ATP-binding protein fbpC                                 |
| 186                     | cation diffusion facilitator family transporter                                |
| 223                     | Tellurium resistance protein terC                                              |
| 368                     | magnesium transporter                                                          |
| 405                     | Superoxide dismutase [Fe]                                                      |
| 515                     | FTR1 family protein                                                            |
| 564                     | lipid-A-disaccharide synthase                                                  |
| 604                     | monovalent cation/proton antiporter, MnhG/PhaG subunit                         |
| 94                      | COG1863: Multisubunit Na <sup>+</sup> /H <sup>+</sup> antiporter, MnhE subunit |
| 603                     | Na <sup>(+)</sup> /H <sup>(+)</sup> antiporter subunit B                       |
| 590                     | Na <sup>(+)</sup> /H <sup>(+)</sup> antiporter subunit C                       |
| 591                     | Na <sup>(+)</sup> /H <sup>(+)</sup> antiporter subunit D                       |
| 592                     | Na <sup>(+)</sup> /H <sup>(+)</sup> antiporter subunit D                       |

**Q: Secondary metabolites biosynthesis, transport and catabolism (2; <1%)**

| <b>RiOG<sup>1</sup></b> | <b>Annotation</b>                                                                         |
|-------------------------|-------------------------------------------------------------------------------------------|
| <u>14</u>               | metabolite:proton symporter family protein                                                |
| 512                     | Protocatechuate 3,4-dioxygenase beta chain                                                |
| 740                     | ABC-type transport system involved in resistance to organic solvents, auxiliary component |

**R: General function prediction only (67; 9%)**

| <b>RiOG<sup>1</sup></b> | <b>Annotation</b>                                                  |
|-------------------------|--------------------------------------------------------------------|
| 256                     | ABC-type transport systems periplasmic component                   |
| 272                     | ABC transporter substrate binding protein                          |
| 425                     | Probable ABC transporter ATP-binding protein in ntrA/rpoN 5'region |
| 532                     | ABC transporter permease protein                                   |
| 533                     | ABC transporter substrate binding protein, family                  |
| 738                     | ABC transporter permease protein                                   |
| 765                     | ABC transporter, putative                                          |
| 293                     | small GTP-binding protein domain                                   |
| 734                     | GTP-binding conserved hypothetical protein                         |
| <u>29</u>               | GTP pyrophosphokinase                                              |
| 390                     | hemolysin A                                                        |
| 263                     | Hemolysin C                                                        |
| 197                     | Phospholipase D (PLD) superfamily protein                          |
| 355                     | Patatin B1 precursor                                               |
| 547                     | Extracellular matrix protein 33 precursor                          |
| 190                     | Putative outer surface protein                                     |
| 606                     | Outer membrane protein, putative                                   |
| 160                     | Outer membrane lipoprotein-sorting protein, putative               |
| <u>5</u>                | outer membrane autotransporter barrel domain                       |
| <u>34</u>               | outer membrane autotransporter barrel domain                       |
| 750                     | Putative outer membrane protein RP075 precursor                    |
| 483                     | Predicted membrane protein                                         |
| 786                     | Putative colicin V production membrane protein                     |
| 363                     | integral membrane protein MviN                                     |
| <u>45</u>               | putative TIM-barrel protein, nifR3 family                          |
| 167                     | COG0687: Spermidine/putrescine-binding periplasmic protein         |
| 83                      | Probable transcriptional regulatory protein silR                   |

|           |                                                                     |
|-----------|---------------------------------------------------------------------|
| 240       | Predicted transcriptional regulator                                 |
| 282       | exsB protein                                                        |
| 790       | putative CarD-like transcriptional regulator                        |
| 74        | Bacterial SH3-like region, putative                                 |
| 154       | Predicted permeases                                                 |
| 237       | Predicted permeases                                                 |
| 332       | Putative permease perM homolog                                      |
| 477       | Predicted permease                                                  |
| 529       | Predicted permease                                                  |
| 657       | TRAP transporter solute receptor, TAXI family                       |
| 775       | Small-conductance mechanosensitive channel, putative                |
| 99        | chromosome partitioning protein, putative                           |
| 453       | COG2945: Predicted hydrolase of the alpha/beta superfamily          |
| 552       | Predicted hydrolase or acyltransferase                              |
| 156       | Metal-dependent hydrolase of the beta-lactamase superfamily I       |
| 626       | Probable (di)nucleoside polyphosphate hydrolase                     |
| <u>53</u> | Predicted esterase of the alpha-beta hydrolase superfamily          |
| 761       | deoxyguanosinetriphosphate triphosphohydrolase, putative            |
| 115       | COG0457: FOG: TPR repeat                                            |
| 465       | invasion protein homolog                                            |
| 105       | Protein cyaY                                                        |
| 440       | Probable cysteine desulfurase 1                                     |
| 783       | metalloendopeptidase, putative, glycoprotease family                |
| 87        | Nitrilotriacetate monooxygenase component B                         |
| 132       | putative ribosomal-protein-alanine N-acetyltransferase              |
| 196       | UbiD family decarboxylases                                          |
| 260       | Carboxylesterase 1                                                  |
| 508       | LD-carboxypeptidase A, putative                                     |
| <u>56</u> | Protein bioY                                                        |
| 366       | Protein senC                                                        |
| 676       | putative oxygen-independent coproporphyrinogen III oxidase          |
| 682       | Protein COQ10 B, mitochondrial precursor                            |
| 394       | Putative glycoprotein endopeptidase                                 |
| 432       | Antigenic heat-stable 120 kDa protein                               |
| 436       | Putative aldolase class 2 protein CC1201                            |
| 461       | 5,10-methenyltetrahydrofolate synthetase                            |
| 480       | Probable inorganic polyphosphate/ATP-NAD kinase                     |
| 490       | Putative branched-chain-amino-acid aminotransferase                 |
| 511       | Putative signal peptide peptidase sppA                              |
| 575       | Lactosylceramide 4-alpha-galactosyltransferase                      |
| 598       | Probable Hsp20-family chaperone                                     |
| 647       | Putative ATPase n2B                                                 |
| 650       | ATP-binding cassette sub-family B member 7, mitochondrial precursor |
| 660       | MJ0042 family finger-like domain                                    |
| 699       | Probable cytosol aminopeptidase                                     |
| 737       | Probable ribonucleotide transport ATP-binding protein mkl           |
| <u>54</u> | Ran-binding protein 2-like 4                                        |

**rpe: Rickettsial palindromic element-containing protein (19; 1%)**

| <b>RiOG<sup>1</sup></b> | <b>Annotation</b>                            |
|-------------------------|----------------------------------------------|
| 77                      | Rickettsial palindromic element (RPE) domain |
| 90                      | Rickettsial palindromic element (RPE) domain |
| 397                     | Rickettsial palindromic element (RPE) domain |
| 451                     | Rickettsial palindromic element (RPE) domain |
| 506                     | Rickettsial palindromic element (RPE) domain |

|     |                                              |
|-----|----------------------------------------------|
| 507 | Rickettsial palindromic element (RPE) domain |
| 719 | Rickettsial palindromic element (RPE) domain |
| 720 | Rickettsial palindromic element (RPE) domain |
| 744 | Rickettsial palindromic element (RPE) domain |
| 776 | Rickettsial palindromic element (RPE) domain |

**S: Function unknown (93; 13%)**

| <b>RiOG<sup>1</sup></b> | <b>Annotation</b>    |
|-------------------------|----------------------|
| <u>31</u>               | Hypothetical protein |
| <u>43</u>               | Hypothetical protein |
| 107                     | hypothetical protein |
| 114                     | Hypothetical protein |
| 121                     | Hypothetical protein |
| 126                     | Hypothetical protein |
| 128                     | Hypothetical protein |
| 135                     | Hypothetical protein |
| 141                     | Hypothetical protein |
| 168                     | Hypothetical protein |
| 169                     | Hypothetical protein |
| 180                     | Hypothetical protein |
| 221                     | Hypothetical protein |
| 222                     | Hypothetical protein |
| 224                     | Hypothetical protein |
| 250                     | Hypothetical protein |
| 280                     | Hypothetical protein |
| 357                     | hypothetical protein |
| 376                     | Hypothetical protein |
| 386                     | Hypothetical protein |
| 426                     | Hypothetical protein |
| 433                     | hypothetical protein |
| 439                     | Hypothetical protein |
| 464                     | Hypothetical protein |
| 476                     | Hypothetical protein |
| 479                     | Hypothetical protein |
| 482                     | Hypothetical protein |
| 485                     | Hypothetical protein |
| 495                     | Hypothetical protein |
| 500                     | Hypothetical protein |
| 503                     | Hypothetical protein |
| 514                     | Hypothetical protein |
| 553                     | Hypothetical protein |
| 566                     | Hypothetical protein |
| 581                     | hypothetical protein |
| 587                     | Hypothetical protein |
| 618                     | hypothetical protein |
| 622                     | Hypothetical protein |
| 635                     | Hypothetical protein |
| 637                     | Hypothetical protein |
| 640                     | hypothetical protein |
| 644                     | Hypothetical protein |
| 656                     | Hypothetical protein |
| 665                     | Hypothetical protein |
| 683                     | Hypothetical protein |
| 687                     | Hypothetical protein |
| 696                     | hypothetical protein |

|     |                                                        |
|-----|--------------------------------------------------------|
| 736 | Hypothetical protein                                   |
| 752 | Hypothetical protein                                   |
| 759 | Hypothetical protein                                   |
| 764 | Hypothetical protein                                   |
| 785 | Hypothetical protein                                   |
| 398 | conserved hypothetical protein                         |
| 79  | conserved hypothetical protein TIGR00726               |
| 102 | conserved hypothetical protein TIGR00278               |
| 146 | conserved hypothetical protein TIGR00701               |
| 158 | conserved hypothetical protein TIGR02281               |
| 159 | conserved hypothetical protein TIGR00103               |
| 257 | conserved hypothetical protein TIGR00096               |
| 262 | conserved hypothetical protein TIGR00043               |
| 467 | conserved hypothetical protein TIGR01033               |
| 557 | conserved hypothetical protein TIGR00250               |
| 563 | conserved hypothetical protein TIGR00247               |
| 799 | conserved hypothetical protein TIGR00150               |
| 681 | conserved hypothetical protein TIGR00046               |
| 391 | UPF0090 protein yhbC                                   |
| 669 | UPF0169 lipoprotein Xf0938 precursor                   |
| 715 | UPF0176 protein RHE_CH03638                            |
| 726 | UPF0335 protein RPA4190                                |
| 787 | UPF0301 protein SPO0296                                |
| 806 | UPF0085 protein Erum2050/ERWE_CDS_02070                |
| 558 | UPF0141 inner membrane protein yhbX                    |
| 130 | UPF0053 protein HI0107                                 |
| 111 | COG1434: Uncharacterized conserved protein             |
| 213 | COG3671: Predicted membrane protein                    |
| 269 | COG3494: Uncharacterized protein conserved in bacteria |
| 270 | COG3814: Uncharacterized protein conserved in bacteria |
| 377 | COG2847: Uncharacterized protein conserved in bacteria |
| 407 | COG5346: Predicted membrane protein                    |
| 539 | COG4765: Uncharacterized protein conserved in bacteria |
| 537 | Uncharacterized protein L183                           |
| 741 | Uncharacterized protein RC0123 precursor               |
| 771 | Uncharacterized lipoprotein RC0077 precursor           |
| 772 | Uncharacterized protein RP050 precursor                |
| 521 | unnamed protein product                                |
| 358 | Protein of unknown function DUF339, putative           |
| 459 | Protein C6orf96                                        |
| 617 | DUF2-containing protein                                |
| 129 | iojap homolog                                          |
| 228 | Asparagine-rich protein                                |
| 380 | Protein mraZ                                           |
| 403 | Myosin heavy chain, clone 203                          |
| 582 | Toxin B                                                |
| 629 | WD40-like repeat                                       |
| 753 | NADPH-dependent 7-cyano-7-deazaguanine reductase       |

#### **T: Transduction mechanisms (9; 1%)**

| <b>RiOG<sup>1</sup></b> | <b>Annotation</b>                        |
|-------------------------|------------------------------------------|
| 227                     | AmpG protein                             |
| 450                     | AmpG-related permease                    |
| 346                     | Nitrogen regulation protein ntrY homolog |
| 491                     | Osmolarity sensor protein EnvZ           |

|     |                                                                  |
|-----|------------------------------------------------------------------|
| 631 | Sensor protein gacS                                              |
| 625 | diguanylate cyclase (GGDEF) domain                               |
| 658 | Universal stress protein UspA                                    |
| 246 | COG0642: Signal transduction histidine kinase                    |
| 788 | COG0643: Chemotaxis protein histidine kinase and related kinases |

#### **U: Intracellular trafficking and secretion (46; 6%)**

| <b>RiOG<sup>1</sup></b> | <b>Annotation</b>                                                   |
|-------------------------|---------------------------------------------------------------------|
| 661                     | VirB2-like protein                                                  |
| 733                     | Type IV secretory system protein VirB3, putative                    |
| 225                     | type IV secretion/conjugal transfer ATPase, VirB4 family            |
| 732                     | type IV secretion/conjugal transfer ATPase, VirB4 family            |
| 584                     | Protein virD4                                                       |
| 729                     | Protein virB6                                                       |
| 96                      | TrbL/VirB6 plasmid Conjugative transfer protein                     |
| 730                     | COG3704: Type IV secretory pathway, VirB6 components                |
| 731                     | TrbL/VirB6 plasmid Conjugative transfer protein                     |
| <u>57</u>               | COG3704: Type IV secretory pathway, VirB6 components                |
| 586                     | VirB8                                                               |
| 588                     | VirB8 protein                                                       |
| 589                     | P-type conjugative transfer protein VirB9                           |
| 123                     | VirB9 protein precursor                                             |
| 585                     | Protein virB10                                                      |
| 122                     | P-type DNA transfer ATPase VirB11                                   |
| 125                     | COG1175: ABC-type sugar transport systems, permease components      |
| 602                     | COG0747: ABC-type dipeptide transport system, periplasmic component |
| 80                      | preprotein translocase, YajC subunit                                |
| 86                      | O-antigen export system permease protein rfbA                       |
| 804                     | O-antigen export system ATP-binding protein rfbB                    |
| 98                      | S-adenosylmethionine transporter                                    |
| 124                     | Heme exporter protein B                                             |
| 131                     | Lipoprotein-releasing system ATP-binding protein lolD               |
| 188                     | heme exporter protein CcmC                                          |
| 267                     | Surfeit locus protein 1                                             |
| 554                     | efflux transporter, RND family, MFP subunit                         |
| 138                     | Sec-independent protein translocase TatC                            |
| 255                     | twin-arginine translocation protein, TatA/E family                  |
| 568                     | type I secretion system ATPase                                      |
| 569                     | type I secretion membrane fusion protein, HlyD family               |
| 571                     | protein TolQ                                                        |
| 570                     | protein TolR                                                        |
| 577                     | Tol-Pal system beta propeller repeat protein TolB                   |
| 630                     | tol-pal system protein YbgF                                         |
| 232                     | signal recognition particle-docking protein FtsY                    |
| 677                     | signal recognition particle protein                                 |
| 723                     | signal peptidase I                                                  |
| 504                     | signal peptidase II                                                 |
| 375                     | preprotein translocase, SecA subunit                                |
| 755                     | protein-export protein SecB                                         |
| 367                     | protein-export membrane protein SecD                                |
| 707                     | preprotein translocase, SecE subunit                                |
| 725                     | protein-export membrane protein SecF                                |
| 748                     | preprotein translocase, SecG subunit                                |
| 324                     | preprotein translocase, SecY subunit                                |
| 774                     | Inner membrane protein oxaA                                         |

**V: Defense mechanisms (11; 2%)**

| <b>RiOG<sup>1</sup></b> | <b>Annotation</b>                                                     |
|-------------------------|-----------------------------------------------------------------------|
| 717                     | HflC protein                                                          |
| 718                     | HflK protein                                                          |
| 452                     | HemY-like protein                                                     |
| 118                     | Multisubunit Na <sup>+</sup> /H <sup>+</sup> antiporter, MnhF subunit |
| 203                     | potassium efflux system protein                                       |
| 688                     | drug resistance transporter, EmrB/QacA subfamily                      |
| <u>49</u>               | Bicyclomycin resistance protein                                       |
| 281                     | Multidrug resistance protein 3                                        |
| 619                     | Multidrug resistance protein A                                        |
| 645                     | Multidrug resistance ABC transporter ATP-binding protein              |
| 674                     | Divalent-cation tolerance protein cutA                                |
| 680                     | Hydrophobe/amphiphile efflux-1 HAE1 family protein                    |

<sup>1</sup>Underscored RiOGs depict non-representative OGs.
