# Supplementary material for: Rickettsia Phylogenomics: Unwinding the Intricacies of Obligate Intracellular Life
Source: PLoS One. 2008 Apr 16;3(4):e2018. doi: 10.1371/journal.pone.0002018 (PMC2635572; doi:10.1371/journal.pone.0002018)
Supplement: Table S7 — Singletons and false singletons present in the R. bellii str. OSU 85 389 genome. (0.06 MB PDF) [file pone.0002018.s010.pdf]

**Table S7. Singletons and false singletons present in the *R. canadensis* str. McKiel genome.**

| <b>RiOG<sup>1</sup></b> | <b>Annotation (175)<sup>2</sup></b>                                                                       | <b>Size<sup>3</sup></b> |
|-------------------------|-----------------------------------------------------------------------------------------------------------|-------------------------|
| 3398                    | AAA+ superfamily protein                                                                                  | 58                      |
| 3400                    | Putative AAA+ superfamily ATPase                                                                          | 65                      |
| 3541                    | Putative AAA+ superfamily ATPase                                                                          | 43                      |
| 2613                    | putative ATPase                                                                                           | 107                     |
| 3428                    | acetoacetyl-CoA reductase                                                                                 | 45                      |
| 2337                    | ALANINE DEHYDROGENASE (pntAA)                                                                             | 39                      |
| 2474                    | COG1012: NAD-dependent aldehyde dehydrogenases                                                            | 97                      |
| 2472                    | Retinal dehydrogenase 2                                                                                   | 49                      |
| 2335                    | NAD(P) transhydrogenase subunit alpha                                                                     | 40                      |
| 3070                    | NAD(p) transhydrogenase subunit beta                                                                      | 44                      |
| 3316                    | NAD(p) transhydrogenase subunit beta                                                                      | 68                      |
| 2223                    | Nucleotidyltransferase                                                                                    | 33                      |
| 2191                    | Predicted glutamine amidotransferase                                                                      | 89                      |
| 2566                    | Type I site-specific restriction-modification system, R (restriction) subunit                             | 56                      |
| 2389                    | ABC transporter ATP-binding protein Uup                                                                   | 61                      |
| 3359                    | ABC transporter ATP-binding protein Uup                                                                   | 100                     |
| 2532                    | ABC-type multidrug transport system, ATPase and permease components                                       | 36                      |
| 2859                    | COG2984: ABC-type uncharacterized transport system, periplasmic component                                 | 42                      |
| 3160                    | MFS type sugar transporter                                                                                | 53                      |
| 3153                    | MFS-type transporter                                                                                      | 54                      |
| 2091                    | Proline/betaine transporter                                                                               | 49                      |
| 2344                    | Variable membrane protein-like protein                                                                    | 46                      |
| 3171                    | COG4953: Membrane carboxypeptidase/penicillin-binding protein PbpC                                        | 63                      |
| 2255                    | COG2982: Uncharacterized protein involved in outer membrane biogenesis                                    | 87                      |
| 3033                    | Outer membrane assembly protein                                                                           | 33                      |
| 3311                    | Outer membrane protein B precursor                                                                        | 87                      |
| 2645                    | Cell surface antigen-like protein Sca13                                                                   | 66                      |
| 2685                    | Cell surface antigen-like protein Sca7                                                                    | 62                      |
| 2722                    | Cell surface antigen-like protein Sca7                                                                    | 56                      |
| 3178                    | Cell surface antigen-like protein Sca7                                                                    | 76                      |
| 2219                    | Ankyrin                                                                                                   | 109                     |
| 3463                    | Tetratricopeptide repeat-containing protein                                                               | 57                      |
| 2140                    | Conjugal transfer protein TraA                                                                            | 69                      |
| 2141                    | Conjugal transfer protein TraA                                                                            | 84                      |
| 2421                    | Conjugal transfer protein TraA                                                                            | 77                      |
| 3034                    | Conjugal transfer protein TraA                                                                            | 72                      |
| 3163                    | Conjugal transfer protein TraA                                                                            | 48                      |
| 3278                    | Conjugal transfer protein TraA                                                                            | 60                      |
| 3468                    | Conjugal transfer protein TraA                                                                            | 82                      |
| 2965                    | Microcin C7 resistance protein                                                                            | 46                      |
| 3286                    | Microcin C7 resistance protein                                                                            | 74                      |
| 3418                    | Antigenic heat-stable 120 kDa protein                                                                     | 47                      |
| 3395                    | NT (nucleotidyltransferase) domain and HEPN (higher eukaryotes and prokaryotes nucleotide-binding) domain | 43                      |
| 808                     | Transposase IS200-like                                                                                    | NA                      |
| 2900                    | COG5304: Uncharacterized protein conserved in bacteria                                                    | 61                      |

|      |                                            |                   |
|------|--------------------------------------------|-------------------|
| 3374 | COG3177: Uncharacterized conserved protein | 52                |
| 2597 | COG4285: Uncharacterized conserved protein | 39                |
|      |                                            | <b>Avg. 61.39</b> |

<sup>1</sup> Underscored RiOGs depict non-representative OGs.

<sup>2</sup> Including 129 singleton HPs, with average length of 53.49 amino acids.

<sup>3</sup> Length in amino acids of predicted singleton ORFs.
