# Supplementary material for: Rickettsia Phylogenomics: Unwinding the Intricacies of Obligate Intracellular Life
Source: PLoS One. 2008 Apr 16;3(4):e2018. doi: 10.1371/journal.pone.0002018 (PMC2635572; doi:10.1371/journal.pone.0002018)
Supplement: Table S10 — Singletons present in the R. typhi str. Wilmington genome. (0.05 MB PDF) [file pone.0002018.s013.pdf]

**Table S10. Singletons and false singletons present in the *R. akari* str. Hartford genome.**

| <b>RiOG<sup>1</sup></b> | <b>Annotation (284)<sup>2</sup></b>                                 | <b>Size<sup>3</sup></b> |
|-------------------------|---------------------------------------------------------------------|-------------------------|
| 2382                    | Acetylglutamate kinase                                              | 53                      |
| 2963                    | Acetylglutamate kinase                                              | 55                      |
| 2853                    | Acetyltransferase                                                   | 30                      |
| 2451                    | alanine racemase                                                    | 64                      |
| 2919                    | alanine racemase                                                    | 74                      |
| 2246                    | ATP-binding cassette sub-family B member 7, mitochondrial           | 59                      |
| 2610                    | ATP-binding cassette sub-family B member 7, mitochondrial           | 66                      |
| 2663                    | ATP-binding cassette sub-family B member 7, mitochondrial precursor | 73                      |
| 3180                    | COG0350: Methylated DNA-protein cysteine methyltransferase          | 37                      |
| 2158                    | COG0616: Periplasmic serine proteases (ClpP class)                  | 50                      |
| 2586                    | COG0616: Periplasmic serine proteases (ClpP class)                  | 59                      |
| 2851                    | COG1043: Acyl-                                                      | 29                      |
| 3089                    | D-alanyl-D-alanine dipeptidase                                      | 35                      |
| 2598                    | D-beta-hydroxybutyrate dehydrogenase                                | 58                      |
| 2324                    | NADH dehydrogenase I chain H                                        | 56                      |
| 2640                    | NADH dehydrogenase subunit N                                        | 99                      |
| 2229                    | DNA methylase N-4/N-6                                               | 64                      |
| 3505                    | DNA methylase N-4/N-6                                               | 41                      |
| 3501                    | DNA modification methylase-like                                     | 44                      |
| 3251                    | Formamidopyrimidine-DNA glycosylase                                 | 64                      |
| 3318                    | Putative 3-methyladenine DNA glycosylase                            | 50                      |
| 2656                    | Glycosyltransferase                                                 | 51                      |
| 3078                    | Ribose-phosphate pyrophosphokinase                                  | 52                      |
| 3288                    | GTP pyrophosphokinase                                               | 111                     |
| 3289                    | GTP pyrophosphokinase                                               | 109                     |
| 2517                    | Guanosine polyphosphate pyrophosphohydrolase/synthetase             | 44                      |
| 3321                    | Guanosine polyphosphate pyrophosphohydrolase/synthetase homolog     | 57                      |
| 3162                    | Guanosine-3',5'-bis(diphosphate) 3'-pyrophosphohydrolase            | 80                      |
| 3432                    | Guanosine-3,5-bis(diphosphate) 3-pyrophosphohydrolase               | 61                      |
| 2978                    | Predicted ATPase                                                    | 45                      |
| 3498                    | Pyrroloquinoline quinone (Coenzyme PQQ) biosynthesis protein C      | 60                      |
| 2588                    | Magnesium and cobalt transport protein CorA                         | 57                      |
| 3204                    | Magnesium and cobalt transport protein CorA                         | 37                      |
| 2522                    | ABC transporter ATP-binding protein                                 | 71                      |
| 2184                    | MFS type sugar transporter                                          | 61                      |
| 2376                    | MFS type sugar transporter                                          | 31                      |
| 2855                    | MFS type sugar transporter                                          | 185                     |
| 2525                    | Na <sup>+</sup> /H <sup>+</sup> antiporter NhaA                     | 34                      |
| 2220                    | Hydrophobe/amphiphile efflux-1 HAE1 family protein                  | 61                      |
| 2485                    | Hydrophobe/amphiphile efflux-1 HAE1 family protein                  | 39                      |
| 2605                    | Hydrophobe/amphiphile efflux-1 HAE1 family protein                  | 106                     |
| 3152                    | Hydrophobe/amphiphile efflux-1 HAE1 family protein                  | 76                      |
| 2650                    | Efflux transporter, RND family, MFP subunit                         | 84                      |
| 2458                    | RND family efflux transporter                                       | 94                      |
| 3510                    | Transporter                                                         | 102                     |
| 3116                    | outer membrane protein A                                            | 32                      |
| 2130                    | Outer membrane protein A precursor                                  | 163                     |
| 2940                    | Outer membrane protein A precursor                                  | 67                      |
| 2101                    | Cell surface antigen-like protein Sca10                             | 128                     |
| 2497                    | Cell surface antigen-like protein Sca10                             | 45                      |
| 2971                    | Cell surface antigen-like protein Sca10                             | 52                      |

|             |                                                                                                           |              |
|-------------|-----------------------------------------------------------------------------------------------------------|--------------|
| 3222        | Cell surface antigen-like protein Sca10                                                                   | 38           |
| 2206        | Cell surface antigen-like protein Sca7                                                                    | 75           |
| 2370        | Cell surface antigen-like protein Sca7                                                                    | 72           |
| 2457        | Cell surface antigen-like protein Sca7                                                                    | 69           |
| 3064        | Cell surface antigen-like protein Sca7                                                                    | 73           |
| 2222        | Cell surface antigen-like protein Sca8                                                                    | 71           |
| 2785        | Cell surface antigen-like protein Sca8                                                                    | 103          |
| 2810        | Cell surface antigen-like protein Sca8                                                                    | 53           |
| 2988        | Multidrug resistance protein mdtB                                                                         | 110          |
| 2454        | Microcin C7 resistance protein                                                                            | 42           |
| 2224        | COG3210: Large exoproteins involved in heme utilization or adhesion                                       | 41           |
| 2183        | invasion protein homolog                                                                                  | 49           |
| 3184        | Growth inhibitor                                                                                          | 34           |
| 2287        | Leucine-rich repeats (LRRs), ribonuclease inhibitor (RI)-like subfamily protein                           | 38           |
| 2420        | NT (nucleotidyltransferase) domain and HEPN (higher eukaryotes and prokaryotes nucleotide-binding) domain | 81           |
| 3408        | plasmid maintenance system antidote protein, XRE family                                                   | 51           |
| 3543        | Conjugal transfer protein TraD                                                                            | 45           |
| 2799        | Phage portal protein                                                                                      | 67           |
| 3296        | Transposase                                                                                               | 65           |
| 2738        | Transposase and inactivated derivative                                                                    | 36           |
| 2556        | transposase Tn5                                                                                           | 41           |
| 2860        | transposase Tn5                                                                                           | 97           |
| 3069        | transposase Tn5                                                                                           | 49           |
| 2212        | Transposase, IS982 family                                                                                 | 73           |
| <u>26</u>   | Transposase, IS200 family protein                                                                         | NA           |
| 2871        | Conserved hypothetical protein                                                                            | 105          |
| 3366        | Conserved hypothetical protein                                                                            | 189          |
| 2177        | Hypothetical protein, conserved                                                                           | 38           |
| 2674        | Hypothetical protein, conserved                                                                           | 35           |
| 2784        | Hypothetical protein, conserved                                                                           | 52           |
| 2837        | Hypothetical protein, conserved                                                                           | 33           |
| 3484        | Hypothetical protein, conserved                                                                           | 46           |
| <b>Avg.</b> |                                                                                                           | <b>64.95</b> |

<sup>1</sup> Underscored RiOGs depict non-representative OGs.

<sup>2</sup> Including 202 singleton HPs, with average length of 68.20 amino acids, and 2 false singleton HPs.

<sup>3</sup> Length in amino acids of predicted singleton ORFs; lengths of false singletons not applicable.
